# Supplementary material for: Xanthone Biosynthetic Pathway in Plants: A Review
Source: Frontiers journal article supplement (doi:10.3389/fpls.2022.809497), 2022-04-08
Supplement: Table_1.XLS [file Table_1.XLS]

## Sheet: DNP Export
Supplementary Table 1. Xanthones obtained from the Dictionary of Natural Products (accessed in July 2020).
Details	Chemical Name	Molecular Formula
📖	6-Acetyl-1,3,7-trihydroxyxanthone	C15H10O6
📖	6-Acetyl-1,3,7-trihydroxyxanthone; Tri-Me ether	C18H16O6
📖	2-Acetyl-6,7,8-trihydroxyxanthone-3-carboxylic acid	C16H10O8
📖	2-Acetyl-6,7,8-trihydroxyxanthone-3-carboxylic acid; 7-Me ether, Me ester	C18H14O8
📖	2-Acetyl-6,7,8-trihydroxyxanthone-3-carboxylic acid; 6,7-Methylene ether, Me ester	C18H12O8
📖	Acredinone C	C35H32O10
📖	Acremoxanthone B	C33H24O12
📖	Acremoxanthone B; O-De-Ac	C31H22O11
📖	Acremoxanthone B; 9a-Deoxy	C33H24O11
📖	Acremoxanthone G	C31H22O11
📖	Acuminol A	C15H8O4
📖	Acuminol A; 6-Hydroxy	C15H8O5
📖	Acumitin	C29H22O6
📖	Adamaxanthone	C19H16O5
📖	Adamaxanthone; (ξ)-form	C19H16O5
📖	Ajamxanthone	C25H24O4
📖	Ajamxanthone; (S)-form	C25H24O4
📖	Allanxanthone B	C28H30O6
📖	Alvaxanthone	C23H24O6
📖	Amauroamoienin	C46H54O7
📖	Antibiotic BE 13793X	C47H56O20
📖	Antibiotic BE 13793X; Aglycone	C28H24O11
📖	Antibiotic FD 594	C47H56O20
📖	Antibiotic MSO 901809	C47H56O20
📖	Antibiotic MSO 901809; Aglycone	C28H24O11
📖	Antibiotic TAN 2421A1	C18H12Cl2O8S
📖	Antibiotic TAN 2421A1; Bisdechloro	C18H14O8S
📖	Antibiotic TAN 2421A1; 5-Dechloro	C18H13ClO8S
📖	Antibiotic TAN 2421A1; 7-Dechloro	C18H13ClO8S
📖	Apetalinone B	C28H30O5
📖	Arixanthomycin A	C37H37NO14
📖	Arixanthomycin A; Aglycone	C28H21NO10
📖	Arixanthomycin A; Aglycone, 6-Me ether	C29H23NO10
📖	Artoindonesianin C	C26H22O8
📖	Artomunoxanthentrione	C26H20O7
📖	Artonin Q	C31H30O8
📖	Artonin Q; (+)-form	C31H30O8
📖	Artonin Q; (±)-form	C31H30O8
📖	Artonin Q; (±)-form, Δ1'-Isomer, 3'-hydroperoxy	C31H30O10
📖	Artonol B	C24H20O7
📖	Artorigidin C	C30H28O7
📖	Asperversin A	C47H58O10
📖	Asperxanthone	C18H12O6
📖	Atroviolacone A	C22H20O6
📖	Austocystin A	C19H13ClO6
📖	Austocystin A; O4-De-Me	C18H11ClO6
📖	Austocystin A; 4,6-Di-O-de-Me	C17H9ClO6
📖	Austocystin A; 2,3-Dihydro, O6-de-Me	C18H13ClO6
📖	Austocystin A; 2,3-Dihydro, O4-De-Me	C18H13ClO6
📖	Austocystin F	C17H10O7
📖	Austocystin F; 8-Chloro, 4-Me ether	C18H11ClO7
📖	Austocystin F; 2,3-Dihydro	C17H12O7
📖	Austocystin F; 2,3-Dihydro, 3a-Me ether	C18H14O7
📖	Austocystin F; 3a-Me ether	C18H12O7
📖	Austocystin F; 4-Me ether	C18H12O7
📖	Austocystin H	C22H18O7
📖	Austocystin H; 3a-Deoxy, 2',3'-dihydro, 3'-hydroxy	C22H20O7
📖	Austocystin H; 3a-Deoxy, 2',3'-dihydro, 3'-hydroxy, 4-Me ether	C23H22O7
📖	Austocystin H; 2',3'-Dihydro, 3'-hydroxy	C22H20O8
📖	Austocystin H; 2',3'-Dihydro, 3'-hydroxy, 4-Me ether	C23H22O8
📖	Austradixanthone	C30H22O13
📖	Bangangxanthone A	C23H22O6
📖	Bangangxanthone A; (+)-form	C23H22O6
📖	Bangangxanthone A; (+)-form, 8-Deoxy	C23H22O5
📖	Batukinaxanthone	C28H30O5
📖	Beccarixanthone T	C29H32O6
📖	Bigarcinenone A	C56H62O13
📖	Bigarcinenone B	C36H28O11
📖	Bijaponicaxanthone	C36H28O13
📖	Bijaponicaxanthone; Diastereomer	C36H28O13
📖	Bijaponicaxanthone; Diastereomer, 6-deoxy	C36H28O12
📖	Bijaponicaxanthone C	C36H30O13
📖	Bikaverin	C20H14O8
📖	Bikaverin; 8-O-De-Me	C19H12O8
📖	Bikaverin; 6-Deoxy	C20H14O7
📖	1,5-Bis(3,7-dimethyl-2,6-octadienyl)-2,3,6,8-tetrahydroxyxanthone	C33H40O6
📖	1,5-Bis(3,7-dimethyl-2,6-octadienyl)-2,3,6,8-tetrahydroxyxanthone; (Z,Z)-form	C33H40O6
📖	1,5-Bis(3,7-dimethyl-2,6-octadienyl)-2,3,6,8-tetrahydroxyxanthone; (Z,Z)-form, 2-Me ether	C34H42O6
📖	Biyouxanthone D	C28H32O6
📖	Biyouxanthone D; (+)-form	C28H32O6
📖	Borhavine	C20H18O7
📖	Bracteaxanthone II	C23H24O7
📖	Bracteaxanthone IV	C19H18O7
📖	Bracteaxanthone IV; 1'ξ-Hydroxy	C19H18O8
📖	Buanmycin	C30H27NO12
📖	Butyraxanthone E	C18H16O6
📖	Calabaxanthone	C24H24O5
📖	Calabaxanthone; O-De-Me	C23H22O5
📖	Calabaxanthone; O-De-Me, 12-hydroxy	C23H22O6
📖	Calabaxanthone; O-De-Me, 9-methoxy	C24H24O6
📖	Calabaxanthone; Demethoxy, 2',3'-dihydro, 3',10-dihydroxy	C23H24O6
📖	Calabaxanthone; Demethoxy, 3,4-dihydro, 10-hydroxy	C23H24O5
📖	Calabaxanthone; Demethoxy, 9,10-dihydroxy	C23H22O6
📖	Calabaxanthone; Demethoxy, 9-hydroxy	C23H22O5
📖	Calabaxanthone; Demethoxy, 10-hydroxy	C23H22O5
📖	Calabaxanthone; Demethoxy, 2',3,3',4-tetrahydro, 3',10-dihydroxy	C23H26O6
📖	Calabaxanthone; 2',3'-Dihydro, 3',9-dihydroxy	C24H26O7
📖	Calabaxanthone; 3,4-Dihydro, 3,9-dihydroxy	C24H26O7
📖	Calabaxanthone; 3,4-Dihydro, 9-hydroxy	C24H26O6
📖	Calabaxanthone; 3,4-Dihydro, 4R-methoxy, 3S,9-dihydroxy	C25H28O8
📖	Calabaxanthone; 3,4-Dihydro, 3R,4R,9-trihydroxy	C24H26O8
📖	Calabaxanthone; 3,4-Dihydro, 3S,4R,9-trihydroxy	C24H26O8
📖	Calabaxanthone; 3,9-Dihydroxy	C24H24O7
📖	Calabaxanthone; 9-Hydroxy	C24H24O6
📖	Calabaxanthone; Δ3'-Isomer, 3,4-dihydro, 9-hydroxy	C24H26O6
📖	Calabaxanthone; 2',3,3',4-Tetrahydro, 3',9-dihydroxy	C24H28O7
📖	Caledonixanthone F	C19H18O7
📖	Caledonixanthone F; (±)-form	C19H18O7
📖	Caledonixanthone H	C18H16O5
📖	Caledonixanthone H; 1'-Epimer	C18H16O5
📖	Caledonixanthone H; 8-Hydroxy	C18H16O6
📖	Caledonixanthone L	C23H22O8
📖	Caledonixanthone M	C23H22O6
📖	Calixanthomycin A	C36H38O13
📖	Calophinone	C28H28O6
📖	Calophylixanthone A	C18H18O4
📖	Calothwaitesixanthone	C23H22O5
📖	Caloxanthone I	C28H28O6
📖	Caloxanthone A	C23H22O6
📖	Caloxanthone A; 8,9-Di-Me ether	C25H26O6
📖	Caloxanthone A; 8-Me ether	C24H24O6
📖	Caloxanthone A; 9-Me ether	C24H24O6
📖	Caloxanthone B	C24H26O6
📖	Caloxanthone B; (+)-form	C24H26O6
📖	Caloxanthone B; (+)-form, 2'',3''-Dihydro, 2''ξ,3''-dihydroxy	C24H28O8
📖	Caloxanthone B; (+)-form, 2'',3''-Dihydro, 3''-hydroxy	C24H28O7
📖	Caloxanthone B; (+)-form, Δ1''-Isomer, 3''-hydroxy	C24H26O7
📖	Caloxanthone B; (+)-form, Δ3''-Isomer, 2''ξ-hydroxy	C24H26O7
📖	Caloxanthone B; (+)-form, Δ3''-Isomer, 2''-oxo	C24H24O7
📖	Caloxanthone D	C23H22O8
📖	Caloxanthone F	C18H16O5
📖	Caloxanthone F; 7-Deoxy	C18H16O4
📖	Caloxanthone H	C18H18O6
📖	Caloxanthone J	C28H30O6
📖	Caloxanthone L	C23H24O5
📖	Caloxanthone Q	C20H18O8
📖	Caloxanthone Q; (+)-form	C20H18O8
📖	Calozeyloxanthone	C23H22O5
📖	Calycinoxanthone D	C23H24O6
📖	Calycinoxanthone D; (+)-form	C23H24O6
📖	Castochrin	C32H22O12S
📖	Cervinomycin A1	C29H23NO9
📖	Chaetoxanthone A	C20H18O7
📖	Chaetoxanthone A; 3'-Deoxy	C20H18O6
📖	Chaetoxanthone C	C20H19ClO6
📖	Chaetoxanthone D	C21H22O6
📖	Chinexanthone A	C29H24O11
📖	Chiratanin	C30H22O13
📖	7-Chloro-2-(3-furanyl)-1,3,8-trimethoxyxanthone	C20H15ClO6
📖	7-Chloro-1,2,3,6-tetrahydroxyxanthone	C13H7ClO6
📖	7-Chloro-1,2,3,6-tetrahydroxyxanthone; 6-Me ether	C14H9ClO6
📖	2-Chloro-1,3,6-trihydroxy-8-methylxanthone	C14H9ClO5
📖	2-Chloro-1,3,6-trihydroxy-8-methylxanthone; 3,6-Di-Me ether	C16H13ClO5
📖	2-Chloro-1,3,6-trihydroxy-8-methylxanthone; 6-Me ether	C15H11ClO5
📖	2-Chloro-1,3,6-trihydroxy-8-methylxanthone; Tri-Me ether	C17H15ClO5
📖	2-Chloro-1,5,8-trihydroxy-6-methylxanthone	C14H9ClO5
📖	2-Chloro-1,5,8-trihydroxy-6-methylxanthone; 5,8-Di-Me ether	C16H13ClO5
📖	2-Chloro-1,5,8-trihydroxy-6-methylxanthone; 5-Me ether	C15H11ClO5
📖	2-Chloro-3,6,8-trihydroxy-1-methylxanthone	C14H9ClO5
📖	2-Chloro-3,6,8-trihydroxy-1-methylxanthone; 3-Me ether	C15H11ClO5
📖	4-Chloro-1,3,6-trihydroxy-8-methylxanthone	C14H9ClO5
📖	4-Chloro-1,3,6-trihydroxy-8-methylxanthone; 3,6-Di-Me ether	C16H13ClO5
📖	4-Chloro-1,3,6-trihydroxy-8-methylxanthone; 3-Me ether	C15H11ClO5
📖	4-Chloro-1,3,6-trihydroxy-8-methylxanthone; 6-Me ether	C15H11ClO5
📖	4-Chloro-1,3,6-trihydroxy-8-methylxanthone; Tri-Me ether	C17H15ClO5
📖	4-Chloro-3,6,8-trihydroxy-1-methylxanthone	C14H9ClO5
📖	4-Chloro-3,6,8-trihydroxy-1-methylxanthone; 3,6-Di-Me ether	C16H13ClO5
📖	4-Chloro-3,6,8-trihydroxy-1-methylxanthone; 3-Me ether	C15H11ClO5
📖	4-Chloro-3,6,8-trihydroxy-1-methylxanthone; 6-Me ether	C15H11ClO5
📖	5-Chloro-1,4,8-trihydroxy-3-methylxanthone	C14H9ClO5
📖	5-Chloro-1,4,8-trihydroxy-3-methylxanthone; 1,4-Di-Me ether	C16H13ClO5
📖	5-Chloro-1,4,8-trihydroxy-3-methylxanthone; 4-Me ether	C15H11ClO5
📖	Citreaglycon A	C27H20O11
📖	Citreaglycon A; 6-Deoxy	C27H20O10
📖	Citreamicin δ; 6,17-Hydroquinone, 7,8-dihydro	C30H25NO11
📖	Citreamicin θA	C30H25NO11
📖	Citreamicin θA; 19-Epimer	C30H25NO11
📖	Cochinchinone I	C28H30O5
📖	Cochinchinone I; 1',2'-Dihydro	C28H32O5
📖	Cochinchinone J	C28H30O5
📖	Cochinensoxanthone	C28H32O6
📖	Cordatooblonguxanthone	C18H16O4
📖	Cowagarcinone A	C34H42O6
📖	Cowagarcinone D	C28H30O6
📖	Cowagarcinone D; 4''-Hydroxy(Z-)	C28H30O7
📖	Cowaxanthone C	C29H32O6
📖	Cowaxanthone C; O-De-Me	C28H30O6
📖	Cowaxanthone E	C25H26O7
📖	Cratopruniforone	C25H24O5
📖	Cratoxyarborenone D	C23H22O7
📖	Cratoxyarborenone D; (ξ)-form	C23H22O7
📖	Cratoxylumxanthone B	C28H32O6
📖	Cratoxyxanthone	C48H50O13
📖	Cratoxyxanthone; 7-O-De-Me	C47H48O13
📖	Cratoxyxanthone; Diepimer	C48H50O13
📖	Cratoxyxanthone; (1''→5')-Isomer	C48H50O13
📖	Cudracuspixanthone C	C24H26O6
📖	Cudracuspixanthone C; Epimer, 5-deoxy, 7-hydroxy	C24H26O6
📖	Cudratricusxanthone I	C18H16O6
📖	Cudratricusxanthone I; 8-Deoxy, 6-hydroxy	C18H16O6
📖	Cudratricusxanthone A	C23H24O6
📖	Cudratricusxanthone A; 2',3'-Dihydro, 3'-hydroxy	C23H26O7
📖	Cudratricusxanthone A; Δ3'-Isomer, 2'ξ-hydroxy	C23H24O7
📖	Cudratricusxanthone A; Δ3'-Isomer, 2'ξ-hydroxy, 6-Me ether	C24H26O7
📖	Cudratricusxanthone A; Δ3'-Isomer, 2'-oxo	C23H22O7
📖	Cudratricusxanthone A; Δ3'-Isomer, 2'-oxo, 2-Me ether	C24H24O7
📖	Cudratricusxanthone A; 2-Me ether	C24H26O6
📖	Cudratricusxanthone A; 6-Me ether	C24H26O6
📖	Cudratricusxanthone D	C23H22O6
📖	Cudratricusxanthone D; 3-Deoxy	C23H22O5
📖	Cudratricusxanthone D; 2-Deoxy, 4-hydroxy	C23H22O6
📖	Cudratricusxanthone D; 3-Deoxy, 4-hydroxy	C23H22O6
📖	Cudratricusxanthone D; Δ3'-Isomer, 2-deoxy, 2'S,4-dihydroxy	C23H22O7
📖	Cudratricusxanthone F	C23H24O6
📖	Cudratricusxanthone H	C23H22O6
📖	Cudratricusxanthone H; 6-Deoxy	C23H22O5
📖	Cudratricusxanthone H; 5-Deoxy, 7-hydroxy	C23H22O6
📖	Cudratricusxanthone J	C23H24O6
📖	Cudratricusxanthone J; 2',3'-Dihydro, 3'-hydroxy	C23H26O7
📖	Cudratricusxanthone J; Δ3'-Isomer, 2'ξ,3''-dihydroxy, 2-Me ether	C24H26O8
📖	Cudratricusxanthone J; Δ3'-Isomer, 3''-hydroxy, 2'-oxo, 2-Me ether	C24H24O8
📖	Cudratrixanthone V	C30H30O7
📖	Cudratrixanthone B	C23H22O6
📖	Cudratrixanthone B; 1'',2''-Dihydro, 2''ξ-hydroxy	C23H24O7
📖	Cudratrixanthone B; 3'-Hydroxy	C23H22O7
📖	Cudratrixanthone H	C23H24O6
📖	Cudratrixanthone H; (ξ)-form	C23H24O6
📖	Cudratrixanthone L	C20H16O6
📖	Cudratrixanthone L; (ξ)-form	C20H16O6
📖	Cudratrixanthone M	C23H24O7
📖	Cudratrixanthone M; (2ξ,7ξ)-form	C23H24O7
📖	Cudratrixanthone M; (2ξ,7ξ)-form, 1R*-Hydroxy	C23H24O8
📖	Cudratrixanthone M; (2ξ,7ξ)-form, 1R*-Methoxy	C24H26O8
📖	Cudratrixanthone N	C23H22O6
📖	Cudratrixanthone N; (ξ)-form	C23H22O6
📖	Cudratrixanthone N; (ξ)-form, 3''-Hydroxy	C23H22O7
📖	Cudratrixanthone O	C23H20O6
📖	Cudratrixanthone W	C30H30O7
📖	Cudraxanthone I	C23H22O5
📖	Cudraxanthone I; 9-Deoxy, 11-hydroxy	C23H22O5
📖	Cudraxanthone I; 2',3'-Dihydro, 2',3'-dihydroxy	C23H24O7
📖	Cudraxanthone I; 10-Hydroxy	C23H22O6
📖	Cudraxanthone I; Δ3'-Isomer, 2'ξ-hydroxy	C23H22O6
📖	Cudraxanthone I; 10-Methoxy, 9-deoxy	C24H24O5
📖	Cudraxanthone A	C23H20O5
📖	Cudraxanthone A; 3-Hydroxy	C23H20O6
📖	Cudraxanthone A; 3-Methoxy, 1',1'',2',2''-tetrahydro	C24H26O6
📖	Cudraxanthone B	C23H22O6
📖	Cudraxanthone E	C24H26O6
📖	Cudraxanthone E; O-De-Me	C23H24O6
📖	Cudraxanthone E; O-De-Me, 6-Me ether	C24H26O6
📖	Cudraxanthone J	C23H24O6
📖	Cudraxanthone K	C23H22O6
📖	Cudraxanthone L	C23H24O6
📖	Cudraxanthone L; Δ3'-Isomer, 2'ξ-hydroxy	C23H24O7
📖	Cudraxanthone M	C23H24O6
📖	Cudraxanthone M; Δ3'-Isomer, 2'ξ-hydroxy	C23H24O7
📖	Cudraxanthone O	C23H22O7
📖	Cudraxanthone O; 3''-Alcohol	C23H22O6
📖	Cudraxanthone R	C23H24O7
📖	Cudraxanthone S	C18H16O6
📖	Cudraxanthone S; 3-Me ether	C19H18O6
📖	Cudraxanthone S; 6-O-(3-Methyl-2-butenyl)	C23H24O6
📖	Cudraxanthone U	C28H20O10
📖	Cycloisoemericellin	C25H26O5
📖	Dalienxanthone A	C20H20O9
📖	Dalienxanthone A; 8-O-De-Me	C19H18O9
📖	Dalienxanthone A; 8-O-De-Me, 3-Me ether	C20H20O9
📖	Dalienxanthone A; 4-Methoxy, 8-O-de-Me, 3-Me ether	C21H22O10
📖	Dalienxanthone A; 4-Methoxy, 3-deoxy, 8-O-de-Me	C20H20O9
📖	Dalienxanthone A; 5-Methoxy, 3-deoxy, 4-hydroxy	C21H22O10
📖	Dehydrocycloguanandin	C18H14O4
📖	Dehydrocycloguanandin; 8-Deoxy	C18H14O3
📖	Dehydrocycloguanandin; 8-Deoxy, 12-hydroxy(2R-)	C18H14O4
📖	Dehydrocycloguanandin; 3,4-Dihydro	C18H16O4
📖	Dehydrocycloguanandin; 3,4-Dihydro, 8-deoxy, 3-hydroxy	C18H16O4
📖	Dehydrocycloguanandin; 3,4-Dihydro, 3-hydroxy	C18H16O5
📖	Dehydrocycloguanandin; 3,4-Dihydro, 10-methoxy, 3R,11-dihydroxy	C19H18O7
📖	Dehydrocycloguanandin; 10-Hydroxy	C18H14O5
📖	Dehydrocycloguanandin; 11-Hydroxy	C18H14O5
📖	Delicoferone B	C28H22O11
📖	3',4'-Deoxypsorospermin	C19H16O5
📖	3',4'-Deoxypsorospermin; (R)-form	C19H16O5
📖	3',4'-Deoxypsorospermin; (R)-form, 3',4'-Dihydro, 3'-hydroxy, 4'-chloro	C19H17ClO6
📖	3',4'-Deoxypsorospermin; (R)-form, 3',4'-Dihydro, 3'-hydroxy, 5-Me ether	C20H20O6
📖	5,7-Dichloro-2,8-dihydroxy-1,3-dimethylxanthone	C15H10Cl2O4
📖	5,7-Dichloro-2,8-dihydroxy-1,3-dimethylxanthone; 2-Me ether	C16H12Cl2O4
📖	2,4-Dichloro-1,3,6-trihydroxy-8-methylxanthone	C14H8Cl2O5
📖	2,4-Dichloro-1,3,6-trihydroxy-8-methylxanthone; 3,6-Di-Me ether	C16H12Cl2O5
📖	2,4-Dichloro-1,3,6-trihydroxy-8-methylxanthone; 6-Me ether	C15H10Cl2O5
📖	2,4-Dichloro-1,3,6-trihydroxy-8-methylxanthone; Tri-Me ether	C17H14Cl2O5
📖	2,4-Dichloro-1,5,8-trihydroxy-6-methylxanthone	C14H8Cl2O5
📖	2,4-Dichloro-1,5,8-trihydroxy-6-methylxanthone; 5,8-Di-Me ether	C16H12Cl2O5
📖	2,4-Dichloro-1,5,8-trihydroxy-6-methylxanthone; 5-Me ether	C15H10Cl2O5
📖	2,4-Dichloro-3,6,8-trihydroxy-1-methylxanthone	C14H8Cl2O5
📖	2,4-Dichloro-3,6,8-trihydroxy-1-methylxanthone; 6-Me ether	C15H10Cl2O5
📖	2,5-Dichloro-1,3,6-trihydroxy-8-methylxanthone	C14H8Cl2O5
📖	2,5-Dichloro-1,3,6-trihydroxy-8-methylxanthone; 3,6-Di-Me ether	C16H12Cl2O5
📖	2,5-Dichloro-1,3,6-trihydroxy-8-methylxanthone; 3-Me ether	C15H10Cl2O5
📖	2,5-Dichloro-1,3,6-trihydroxy-8-methylxanthone; 6-Me ether	C15H10Cl2O5
📖	2,5-Dichloro-3,6,8-trihydroxy-1-methylxanthone	C14H8Cl2O5
📖	2,7-Dichloro-1,3,6-trihydroxy-8-methylxanthone	C14H8Cl2O5
📖	2,7-Dichloro-1,3,6-trihydroxy-8-methylxanthone; 3,6-Di-Me ether	C16H12Cl2O5
📖	2,7-Dichloro-1,3,6-trihydroxy-8-methylxanthone; 3-Me ether	C15H10Cl2O5
📖	2,7-Dichloro-1,3,6-trihydroxy-8-methylxanthone; 6-Me ether	C15H10Cl2O5
📖	2,7-Dichloro-1,3,6-trihydroxy-8-methylxanthone; Tri-Me ether	C17H14Cl2O5
📖	4,5-Dichloro-1,3,6-trihydroxy-8-methylxanthone	C14H8Cl2O5
📖	4,5-Dichloro-1,3,6-trihydroxy-8-methylxanthone; 3,6-Di-Me ether	C16H12Cl2O5
📖	4,5-Dichloro-1,3,6-trihydroxy-8-methylxanthone; 3-Me ether	C15H10Cl2O5
📖	4,5-Dichloro-1,3,6-trihydroxy-8-methylxanthone; 6-Me ether	C15H10Cl2O5
📖	4,5-Dichloro-1,3,6-trihydroxy-8-methylxanthone; Tri-Me ether	C17H14Cl2O5
📖	2,4-Diglucosyl-1,3,6,7-tetrahydroxyxanthone	C25H28O16
📖	2,4-Diglucosyl-1,3,6,7-tetrahydroxyxanthone; 3,6,7-Tri-Me ether	C28H34O16
📖	Dihydroartoindonesianin C	C25H24O6
📖	2,3-Dihydro-4,7-dihydroxy-2-(1-hydroxy-1-methylethyl)-5H-furo[3,2-b]xanthen-5-one	C18H16O6
📖	2,3-Dihydro-4,7-dihydroxy-2-(1-hydroxy-1-methylethyl)-5H-furo[3,2-b]xanthen-5-one; 1'-Deoxy, 1',2'-didehydro	C18H14O5
📖	2,3-Dihydro-4,7-dihydroxy-2-(1-hydroxy-1-methylethyl)-5H-furo[3,2-b]xanthen-5-one; (-)-form	C18H16O6
📖	1,2-Dihydro-5,12-dihydroxy-1,1,2,10,10-pentamethyl-4-(3-methyl-2-butenyl)-6H,10H-furo[3,2-h]pyrano[3,2-b]xanthen-6-one	C28H30O6
📖	2,3-Dihydro-6,8,11-trihydroxy-2-(1-hydroxy-1-methylethyl)-5H-furo[3,2-b]xanthen-5-one	C18H16O7
📖	2,3-Dihydro-6,8,11-trihydroxy-2-(1-hydroxy-1-methylethyl)-5H-furo[3,2-b]xanthen-5-one; (S)-form	C18H16O7
📖	2,3-Dihydro-6,8,11-trihydroxy-2-(1-hydroxy-1-methylethyl)-5H-furo[3,2-b]xanthen-5-one; (S)-form, 1'-Deoxy, 1',2'-didehydro	C18H14O6
📖	1,2-Dihydro-1,8,10-trihydroxy-2-(1-hydroxy-1-methylethyl)-9-(3-methyl-2-butenyl)-11H-furo[3,2-a]xanthen-11-one	C23H24O7
📖	1,2-Dihydro-1,8,10-trihydroxy-2-(1-hydroxy-1-methylethyl)-9-(3-methyl-2-butenyl)-11H-furo[3,2-a]xanthen-11-one; 1'-Deoxy, 7-hydroxy	C23H24O7
📖	1,2-Dihydro-1,8,10-trihydroxy-2-(1-hydroxy-1-methylethyl)-9-(3-methyl-2-butenyl)-11H-furo[3,2-a]xanthen-11-one; 1'-Deoxy, 7-hydroxy, 1-Me ether	C24H26O7
📖	1,2-Dihydro-1,8,10-trihydroxy-2-(1-hydroxy-1-methylethyl)-9-(3-methyl-2-butenyl)-11H-furo[3,2-a]xanthen-11-one; 1',3'-Dideoxy, 3',4'-didehydro, 7-hydroxy	C23H22O6
📖	1,2-Dihydro-5,9,10-trihydroxy-1,1,2-trimethyl-6H-furo[2,3-c]xanthen-6-one	C18H16O6
📖	1,2-Dihydro-5,9,10-trihydroxy-1,1,2-trimethyl-6H-furo[2,3-c]xanthen-6-one; (-)-form	C18H16O6
📖	1,2-Dihydro-5,9,10-trihydroxy-1,1,2-trimethyl-6H-furo[2,3-c]xanthen-6-one; (-)-form, 10-Me ether	C19H18O6
📖	1,2-Dihydro-5,9,10-trihydroxy-1,1,2-trimethyl-6H-furo[2,3-c]xanthen-6-one; (ξ)-form	C18H16O6
📖	1,2-Dihydro-5,9,10-trihydroxy-1,1,2-trimethyl-6H-furo[2,3-c]xanthen-6-one; (ξ)-form, 10-Deoxy, 8-hydroxy	C18H16O6
📖	1,2-Dihydro-5,9,10-trihydroxy-1,1,2-trimethyl-6H-furo[2,3-c]xanthen-6-one; (ξ)-form, 9,10-Di-Me ether	C20H20O6
📖	1,2-Dihydro-5,9,10-trihydroxy-1,1,2-trimethyl-6H-furo[2,3-c]xanthen-6-one; (ξ)-form, 8-Hydroxy	C18H16O7
📖	1,2-Dihydro-5,9,10-trihydroxy-1,1,2-trimethyl-6H-furo[2,3-c]xanthen-6-one; (ξ)-form, 9-Me ether	C19H18O6
📖	1,8-Dihydroxy-3,7-dimethoxy-4-[3-methyl-4-(4-methyl-5-oxo-2H-furan-2-yl)-2-butenyloxy]xanthone	C25H24O9
📖	6,11-Dihydroxy-2,2-dimethylpyrano[3,2-c]xanthen-7(2H)-one	C18H14O5
📖	6,11-Dihydroxy-3,3-dimethyl-3H,7H-pyrano[2,3-c]xanthen-7-one	C18H14O5
📖	6,11-Dihydroxy-3,3-dimethyl-3H,7H-pyrano[2,3-c]xanthen-7-one; 8-Hydroxy	C18H14O6
📖	6,11-Dihydroxy-3,3-dimethyl-3H,7H-pyrano[2,3-c]xanthen-7-one; 5-Methoxy	C19H16O6
📖	1,3-Dihydroxy-6,7-dimethylxanthone	C15H12O4
📖	1,3-Dihydroxy-6,7-dimethylxanthone; 1-O-β-D-Glucopyranoside	C21H22O9
📖	6,8-Dihydroxy-1,7-diprenylxanthone-2-carboxylic acid	C24H24O6
📖	1,5-Dihydroxy-6-(2-hydroxyethyl)xanthone-3-carboxylic acid	C16H12O7
📖	1,5-Dihydroxy-6-(2-hydroxyethyl)xanthone-3-carboxylic acid; Me ester	C17H14O7
📖	1,5-Dihydroxy-6-(2-hydroxyethyl)xanthone-3-carboxylic acid; 1-Me ether, Me ester	C18H16O7
📖	4,8-Dihydroxy-6-(2-hydroxyethyl)xanthone-1-carboxylic acid	C16H12O7
📖	4,8-Dihydroxy-6-(2-hydroxyethyl)xanthone-1-carboxylic acid; 2'-Ac, Me ester	C19H16O8
📖	4,8-Dihydroxy-6-(2-hydroxyethyl)xanthone-1-carboxylic acid; 4-Me ether, 2'-Ac, Me ester	C20H18O8
📖	4,8-Dihydroxy-6-(2-hydroxyethyl)xanthone-3-carboxylic acid	C16H12O7
📖	4,8-Dihydroxy-6-(2-hydroxyethyl)xanthone-3-carboxylic acid; 5-Hydroxy, 4-Me ether, Me ester	C18H16O8
📖	4,8-Dihydroxy-6-(2-hydroxyethyl)xanthone-3-carboxylic acid; 4-Me ether, Me ester	C18H16O7
📖	2,8-Dihydroxy-1-(hydroxymethyl)-3-methyl-7-prenylxanthone	C20H20O5
📖	2,8-Dihydroxy-1-(hydroxymethyl)-3-methyl-7-prenylxanthone; 2-O-(3-Methyl-2-butenyl)	C25H28O5
📖	1,3-Dihydroxy-8-(hydroxymethyl)-6-methylxanthone	C15H12O5
📖	1,3-Dihydroxy-8-(hydroxymethyl)-6-methylxanthone; 3-Me ether	C16H14O5
📖	1,6-Dihydroxy-8-(hydroxymethyl)-3-methylxanthone	C15H12O5
📖	1,6-Dihydroxy-8-(hydroxymethyl)-3-methylxanthone; 6-Me ether	C16H14O5
📖	2,8-Dihydroxy-1-(hydroxymethyl)-3-methylxanthone	C15H12O5
📖	2,8-Dihydroxy-1-(hydroxymethyl)-3-methylxanthone; 2-O-[3-(Aminocarbonyl)-2E-butenyl], 8-Me ether	C21H21NO6
📖	2,8-Dihydroxy-1-(hydroxymethyl)-3-methylxanthone; 1'-O-(1,1-Dimethyl-2-propenyl), 8-Me ether	C21H22O5
📖	2,8-Dihydroxy-1-(hydroxymethyl)-3-methylxanthone; 2-O-(3-Methyl-2-butenyl)	C20H20O5
📖	2,8-Dihydroxy-1-(hydroxymethyl)-3-methylxanthone; 2-O-(3-Methyl-2-butenyl), 8-Me ether	C21H22O5
📖	1,6-Dihydroxy-7-(hydroxymethyl)xanthone	C14H10O5
📖	1,6-Dihydroxy-7-(hydroxymethyl)xanthone; 6-Me ether	C15H12O5
📖	1,7-Dihydroxy-3-(hydroxymethyl)xanthone	C14H10O5
📖	1,7-Dihydroxy-3-(hydroxymethyl)xanthone; 1-Me ether	C15H12O5
📖	2,8-Dihydroxy-6-(hydroxymethyl)xanthone-1-carboxylic acid	C15H10O7
📖	2,8-Dihydroxy-6-(hydroxymethyl)xanthone-1-carboxylic acid; 1'-Ac, Me ester	C18H14O8
📖	2,8-Dihydroxy-6-(hydroxymethyl)xanthone-1-carboxylic acid; Me ester	C16H12O7
📖	2,8-Dihydroxy-6-(hydroxymethyl)xanthone-1-carboxylic acid; 8-Me ether	C16H12O7
📖	2,8-Dihydroxy-6-(hydroxymethyl)xanthone-1-carboxylic acid; 2-Me ether, Me ester	C17H14O7
📖	4,8-Dihydroxy-6-(hydroxymethyl)xanthone-3-carboxylic acid	C15H10O7
📖	4,8-Dihydroxy-6-(hydroxymethyl)xanthone-3-carboxylic acid; 5-Chloro, Me ester	C16H11ClO7
📖	4,8-Dihydroxy-6-(hydroxymethyl)xanthone-3-carboxylic acid; Me ester	C16H12O7
📖	4,8-Dihydroxy-6-(3-methyl-2-butenyl)xanthone-3-carboxylic acid	C19H16O6
📖	4,8-Dihydroxy-6-(3-methyl-2-butenyl)xanthone-3-carboxylic acid; Δ3'-Isomer, 2'-oxo, di-Me ether, Me ester	C22H20O7
📖	4,8-Dihydroxy-6-(3-methyl-2-butenyl)xanthone-3-carboxylic acid; Δ3'-Isomer, 2'-oxo, 2-hydroxy, di-Me ether, Me ester	C22H20O8
📖	4,8-Dihydroxy-6-(3-methyl-2-butenyl)xanthone-3-carboxylic acid; Δ3'-Isomer, 2'-oxo, 8-Me ether, Me ester	C21H18O7
📖	3-(2,3-Dihydroxy-3-methylbutyl)-4-hydroxyxanthone	C18H18O5
📖	3-(2,3-Dihydroxy-3-methylbutyl)-4-hydroxyxanthone; (-)-form	C18H18O5
📖	5,10-Dihydroxy-2-methyl-2-(4-methyl-3-pentenyl)-2H,6H-pyrano[3,2-b]xanthen-6-one	C23H22O5
📖	5,10-Dihydroxy-2-methyl-2-(4-methyl-3-pentenyl)-2H,6H-pyrano[3,2-b]xanthen-6-one; (+)-form	C23H22O5
📖	5,10-Dihydroxy-2-methyl-2-(4-methyl-3-pentenyl)-2H,6H-pyrano[3,2-b]xanthen-6-one; (+)-form, 7-Hydroxy	C23H22O6
📖	5,10-Dihydroxy-2-methyl-2-(4-methyl-3-pentenyl)-2H,6H-pyrano[3,2-b]xanthen-6-one; (+)-form, 8-Hydroxy, 10-deoxy	C23H22O5
📖	1,7-Dihydroxy-3-methylxanthone	C14H10O4
📖	2,3-Dihydroxy-7-methylxanthone	C14H10O4
📖	1,8-Dihydroxy-6-methylxanthone-3-carboxylic acid	C15H10O6
📖	1,8-Dihydroxy-6-methylxanthone-3-carboxylic acid; 1-Me ether	C16H12O6
📖	1,8-Dihydroxy-6-methylxanthone-3-carboxylic acid; 1-Me ether, Me ester	C17H14O6
📖	2,8-Dihydroxy-3-methylxanthone-1-carboxylic acid	C15H10O6
📖	2,8-Dihydroxy-3-methylxanthone-1-carboxylic acid; Me ester	C16H12O6
📖	2,8-Dihydroxy-6-methylxanthone-1-carboxylic acid	C15H10O6
📖	2,8-Dihydroxy-6-methylxanthone-1-carboxylic acid; Di-Me ether, Me ester	C18H16O6
📖	2,8-Dihydroxy-6-methylxanthone-1-carboxylic acid; Me ester	C16H12O6
📖	2,8-Dihydroxy-6-methylxanthone-1-carboxylic acid; 8-Me ether	C16H12O6
📖	3,7-Dihydroxy-6-methylxanthone-1-carboxylic acid	C15H10O6
📖	3,7-Dihydroxy-6-methylxanthone-1-carboxylic acid; Me ester	C16H12O6
📖	3,8-Dihydroxy-6-methylxanthone-1-carboxylic acid	C15H10O6
📖	3,8-Dihydroxy-6-methylxanthone-1-carboxylic acid; 4-Chloro, 3-Me ether, Me ester	C17H13ClO6
📖	3,8-Dihydroxy-6-methylxanthone-1-carboxylic acid; 5,7-Dichloro, Me ester	C16H10Cl2O6
📖	3,8-Dihydroxy-6-methylxanthone-1-carboxylic acid; 8-O-β-D-Glucopyranoside	C21H20O11
📖	3,8-Dihydroxy-6-methylxanthone-1-carboxylic acid; 8-O-[β-D-Glucopyranosyl-(1→6)-β-D-glucopyranoside]	C27H30O16
📖	3,8-Dihydroxy-6-methylxanthone-1-carboxylic acid; 12-Hydroxy, Me ester	C16H12O7
📖	3,8-Dihydroxy-6-methylxanthone-1-carboxylic acid; 12-Hydroxy, 3-Me ether	C16H12O7
📖	3,8-Dihydroxy-6-methylxanthone-1-carboxylic acid; 12-Hydroxy, 3-Me ether, Me ester	C17H14O7
📖	3,8-Dihydroxy-6-methylxanthone-1-carboxylic acid; Me ester	C16H12O6
📖	3,8-Dihydroxy-6-methylxanthone-1-carboxylic acid; 3-Me ether	C16H12O6
📖	3,8-Dihydroxy-6-methylxanthone-1-carboxylic acid; 3-Me ether, Me ester	C17H14O6
📖	4,8-Dihydroxy-6-methylxanthone-1-carboxylic acid	C15H10O6
📖	4,8-Dihydroxy-6-methylxanthone-1-carboxylic acid; Me ester	C16H12O6
📖	6,8-Dihydroxy-3-methylxanthone-1-carboxylic acid	C15H10O6
📖	6,8-Dihydroxy-3-methylxanthone-1-carboxylic acid; 5-Chloro, 6-Me ether, Me ester	C17H13ClO6
📖	6,8-Dihydroxy-3-methylxanthone-1-carboxylic acid; 1'-Hydroxy, Me ester	C16H12O7
📖	6,8-Dihydroxy-3-methylxanthone-1-carboxylic acid; 6-Me ether, Me ester	C17H14O6
📖	4,8-Dihydroxy-6-(2-oxopropyl)xanthone-3-carboxylic acid	C17H12O7
📖	4,8-Dihydroxy-6-(2-oxopropyl)xanthone-3-carboxylic acid; Me ester	C18H14O7
📖	3-(3,4-Dihydroxyphenyl)-2,3-dihydro-2-(hydroxymethyl)-7H-dioxino[2,3-c]xanthen-7-one	C22H16O7
📖	3-(3,4-Dihydroxyphenyl)-2,3-dihydro-2-(hydroxymethyl)-7H-dioxino[2,3-c]xanthen-7-one; (7'R*,8'R*)-form	C22H16O7
📖	3-(3,4-Dihydroxyphenyl)-2,3-dihydro-2-(hydroxymethyl)-7H-dioxino[2,3-c]xanthen-7-one; (7'R*,8'R*)-form, 6,8-Dihydroxy, 3'-Me ether	C23H18O9
📖	3-(3,4-Dihydroxyphenyl)-2,3-dihydro-2-(hydroxymethyl)-7H-dioxino[2,3-c]xanthen-7-one; (7'R*,8'R*)-form, 2,5'-Dimethoxy, 4'-deoxy	C24H20O8
📖	3-(3,4-Dihydroxyphenyl)-2,3-dihydro-2-(hydroxymethyl)-7H-dioxino[2,3-c]xanthen-7-one; (7'R*,8'R*)-form, 2,5'-Dimethoxy, 4'-deoxy, 9'-Ac	C26H22O9
📖	3-(3,4-Dihydroxyphenyl)-2,3-dihydro-2-(hydroxymethyl)-7H-dioxino[2,3-c]xanthen-7-one; (7'R*,8'R*)-form, 2,5'-Dimethoxy, 6,8-dihydroxy, 3'-Me ether	C25H22O11
📖	3-(3,4-Dihydroxyphenyl)-2,3-dihydro-2-(hydroxymethyl)-7H-dioxino[2,3-c]xanthen-7-one; (7'R*,8'R*)-form, 2,5'-Dimethoxy, 2'-hydroxy	C24H20O10
📖	3-(3,4-Dihydroxyphenyl)-2,3-dihydro-2-(hydroxymethyl)-7H-dioxino[2,3-c]xanthen-7-one; (7'R*,8'R*)-form, 2,5'-Dimethoxy, 8-hydroxy, 3'-Me ether	C25H22O10
📖	3-(3,4-Dihydroxyphenyl)-2,3-dihydro-2-(hydroxymethyl)-7H-dioxino[2,3-c]xanthen-7-one; (7'R*,8'R*)-form, 2,6'-Dimethoxy, 8-hydroxy, 4'-Me ether	C25H22O10
📖	3-(3,4-Dihydroxyphenyl)-2,3-dihydro-2-(hydroxymethyl)-7H-dioxino[2,3-c]xanthen-7-one; (7'R*,8'R*)-form, 2,8-Dimethoxy, 6-hydroxy, 3'-Me ether	C25H22O10
📖	3-(3,4-Dihydroxyphenyl)-2,3-dihydro-2-(hydroxymethyl)-7H-dioxino[2,3-c]xanthen-7-one; (7'R*,8'R*)-form, 5',6-Dimethoxy, 8-hydroxy, 3'-Me ether	C25H22O10
📖	3-(3,4-Dihydroxyphenyl)-2,3-dihydro-2-(hydroxymethyl)-7H-dioxino[2,3-c]xanthen-7-one; (7'R*,8'R*)-form, 5',8-Dimethoxy, 6-hydroxy, 3'-Me ether	C25H22O10
📖	3-(3,4-Dihydroxyphenyl)-2,3-dihydro-2-(hydroxymethyl)-7H-dioxino[2,3-c]xanthen-7-one; (7'R*,8'R*)-form, 2,5'-Dimethoxy, 3'-Me ether	C25H22O9
📖	3-(3,4-Dihydroxyphenyl)-2,3-dihydro-2-(hydroxymethyl)-7H-dioxino[2,3-c]xanthen-7-one; (7'R*,8'R*)-form, 2,6-Dimethoxy, 3'-Me ether	C25H22O9
📖	3-(3,4-Dihydroxyphenyl)-2,3-dihydro-2-(hydroxymethyl)-7H-dioxino[2,3-c]xanthen-7-one; (7'R*,8'R*)-form, 2,8-Dimethoxy, 3'-Me ether	C25H22O9
📖	3-(3,4-Dihydroxyphenyl)-2,3-dihydro-2-(hydroxymethyl)-7H-dioxino[2,3-c]xanthen-7-one; (7'R*,8'R*)-form, 2-Hydroxy, 3'-Me ether	C23H18O8
📖	3-(3,4-Dihydroxyphenyl)-2,3-dihydro-2-(hydroxymethyl)-7H-dioxino[2,3-c]xanthen-7-one; (7'R*,8'R*)-form, 2-Methoxy, 6,8-dihydroxy, 3'-Me ether	C24H20O10
📖	3-(3,4-Dihydroxyphenyl)-2,3-dihydro-2-(hydroxymethyl)-7H-dioxino[2,3-c]xanthen-7-one; (7'R*,8'R*)-form, 5'-Methoxy, 1,7-dihydroxy, 3'-Me ether	C24H20O10
📖	3-(3,4-Dihydroxyphenyl)-2,3-dihydro-2-(hydroxymethyl)-7H-dioxino[2,3-c]xanthen-7-one; (7'R*,8'R*)-form, 5'-Methoxy, 6,8-dihydroxy, 3'-Me ether	C24H20O10
📖	3-(3,4-Dihydroxyphenyl)-2,3-dihydro-2-(hydroxymethyl)-7H-dioxino[2,3-c]xanthen-7-one; (7'R*,8'R*)-form, 2-Methoxy, 8-hydroxy, 4'-Me ether	C24H20O9
📖	3-(3,4-Dihydroxyphenyl)-2,3-dihydro-2-(hydroxymethyl)-7H-dioxino[2,3-c]xanthen-7-one; (7'R*,8'R*)-form, 5'-Methoxy, 2-hydroxy, 3'-Me ether	C24H20O9
📖	3-(3,4-Dihydroxyphenyl)-2,3-dihydro-2-(hydroxymethyl)-7H-dioxino[2,3-c]xanthen-7-one; (7'R*,8'R*)-form, 6-Methoxy, 8-hydroxy, 3'-Me ether	C24H20O9
📖	3-(3,4-Dihydroxyphenyl)-2,3-dihydro-2-(hydroxymethyl)-7H-dioxino[2,3-c]xanthen-7-one; (7'R*,8'R*)-form, 2-Methoxy, 3'-Me ether	C24H20O8
📖	3-(3,4-Dihydroxyphenyl)-2,3-dihydro-2-(hydroxymethyl)-7H-dioxino[2,3-c]xanthen-7-one; (7'R*,8'R*)-form, 2-Methoxy, 4'-Me ether	C24H20O8
📖	3-(3,4-Dihydroxyphenyl)-2,3-dihydro-2-(hydroxymethyl)-7H-dioxino[2,3-c]xanthen-7-one; (7'R*,8'R*)-form, 2-Methoxy, 4'-Me ether, 9'-Ac	C26H22O9
📖	3-(3,4-Dihydroxyphenyl)-2,3-dihydro-2-(hydroxymethyl)-7H-dioxino[2,3-c]xanthen-7-one; (7'R*,8'R*)-form, 2,5',8-Trimethoxy, 3'-Me ether	C26H24O10
📖	1,5-Dihydroxy-2-prenylxanthone	C18H16O4
📖	1,5-Dihydroxy-2-prenylxanthone; Bis-O-(3-methyl-2-butenyl)	C28H32O4
📖	1,5-Dihydroxy-6-prenylxanthone	C18H16O4
📖	1,5-Dihydroxy-6-prenylxanthone; 2',3'-Dihydro, 4'-hydroxy	C18H18O5
📖	1,5-Dihydroxy-6-prenylxanthone; 4'-Hydroxy	C18H16O5
📖	2,8-Dihydroxy-1-prenylxanthone	C18H16O4
📖	2,8-Dihydroxy-1-prenylxanthone; 4'-Hydroxy	C18H16O5
📖	4,8-Dihydroxy-1-prenylxanthone	C18H16O4
📖	1,2-Dihydroxyxanthone	C13H8O4
📖	1,2-Dihydroxyxanthone; Di-Me ether	C15H12O4
📖	1,2-Dihydroxyxanthone; 1-Me ether	C14H10O4
📖	1,2-Dihydroxyxanthone; 2-Me ether	C14H10O4
📖	1,2-Dihydroxyxanthone; Methylene ether	C14H8O4
📖	1,3-Dihydroxyxanthone	C13H8O4
📖	1,3-Dihydroxyxanthone; 3-Ac	C15H10O5
📖	1,3-Dihydroxyxanthone; 3-O-[β-D-Apiofuranosyl-(1→6)-β-D-glucopyranoside]	C24H26O13
📖	1,3-Dihydroxyxanthone; Di-Ac	C17H12O6
📖	1,3-Dihydroxyxanthone; Di-Me ether	C15H12O4
📖	1,3-Dihydroxyxanthone; 3-Et ether	C15H12O4
📖	1,3-Dihydroxyxanthone; 1-Me ether	C14H10O4
📖	1,3-Dihydroxyxanthone; 3-Me ether	C14H10O4
📖	1,3-Dihydroxyxanthone; 3-O-[α-L-Rhamnopyranosyl-(1→6)-β-D-glucopyranoside]	C25H28O13
📖	1,4-Dihydroxyxanthone	C13H8O4
📖	1,4-Dihydroxyxanthone; Di-Ac	C17H12O6
📖	1,4-Dihydroxyxanthone; 1-Me ether	C14H10O4
📖	1,5-Dihydroxyxanthone	C13H8O4
📖	1,5-Dihydroxyxanthone; Bis-O-(3-methyl-2-butenyl)	C23H24O4
📖	1,5-Dihydroxyxanthone; Di-Me ether	C15H12O4
📖	1,5-Dihydroxyxanthone; 1-Me ether	C14H10O4
📖	1,5-Dihydroxyxanthone; 5-Me ether	C14H10O4
📖	1,6-Dihydroxyxanthone	C13H8O4
📖	1,6-Dihydroxyxanthone; Di-Me ether	C15H12O4
📖	1,6-Dihydroxyxanthone; 6-Me ether	C14H10O4
📖	1,7-Dihydroxyxanthone	C13H8O4
📖	1,7-Dihydroxyxanthone; 7-O-[β-D-Apiofuranosyl-(1→6)-β-D-glucopyranoside]	C24H26O13
📖	1,7-Dihydroxyxanthone; 7-O-[α-L-Arabinopyranosyl-(1→6)-β-D-glucopyranoside]	C24H26O13
📖	1,7-Dihydroxyxanthone; Di-Me ether	C15H12O4
📖	1,7-Dihydroxyxanthone; 7-O-β-D-Glucopyranoside	C19H18O9
📖	1,7-Dihydroxyxanthone; 7-O-β-D-Glucuronopyranoside	C19H16O10
📖	1,7-Dihydroxyxanthone; 1-Me ether	C14H10O4
📖	1,7-Dihydroxyxanthone; 7-Me ether	C14H10O4
📖	1,7-Dihydroxyxanthone; 1-Me ether, 7-O-[β-D-apiofuranosyl-(1→6)-β-D-glucopyranoside]	C25H28O13
📖	1,7-Dihydroxyxanthone; 1-Me ether, 7-O-β-D-glucopyranoside	C20H20O9
📖	1,7-Dihydroxyxanthone; 7-O-[α-L-Rhamnopyranosyl-(1→2)-β-D-glucopyranoside]	C25H28O13
📖	2,3-Dihydroxyxanthone	C13H8O4
📖	2,3-Dihydroxyxanthone; Di-Ac	C17H12O6
📖	2,3-Dihydroxyxanthone; Di-Me ether	C15H12O4
📖	2,3-Dihydroxyxanthone; 2-Me ether	C14H10O4
📖	2,3-Dihydroxyxanthone; 3-Me ether	C14H10O4
📖	2,3-Dihydroxyxanthone; 2,3-Methylene ether	C14H8O4
📖	2,5-Dihydroxyxanthone	C13H8O4
📖	2,5-Dihydroxyxanthone; Di-Ac	C17H12O6
📖	2,5-Dihydroxyxanthone; Di-Me ether	C15H12O4
📖	2,5-Dihydroxyxanthone; 2-Me ether	C14H10O4
📖	2,5-Dihydroxyxanthone; 5-Me ether	C14H10O4
📖	2,6-Dihydroxyxanthone	C13H8O4
📖	2,6-Dihydroxyxanthone; Di-Me ether	C15H12O4
📖	2,7-Dihydroxyxanthone	C13H8O4
📖	2,7-Dihydroxyxanthone; Di-Me ether	C15H12O4
📖	3,4-Dihydroxyxanthone	C13H8O4
📖	3,4-Dihydroxyxanthone; Di-Ac	C17H12O6
📖	3,4-Dihydroxyxanthone; Di-Me ether	C15H12O4
📖	3,4-Dihydroxyxanthone; 3-Me ether	C14H10O4
📖	3,4-Dihydroxyxanthone; 4-Me ether	C14H10O4
📖	3,5-Dihydroxyxanthone	C13H8O4
📖	3,5-Dihydroxyxanthone; Di-Me ether	C15H12O4
📖	3,5-Dihydroxyxanthone; 3-Me ether	C14H10O4
📖	3,5-Dihydroxyxanthone; 5-Me ether	C14H10O4
📖	4,5-Dihydroxyxanthone	C13H8O4
📖	4,5-Dihydroxyxanthone; Di-Ac	C17H12O6
📖	4,5-Dihydroxyxanthone; Di-Et ether	C17H16O4
📖	4,5-Dihydroxyxanthone; Di-Me ether	C15H12O4
📖	4,5-Dihydroxyxanthone; 4-O-[4-Hydroxybenzoyl-(→4)-β-D-glucopyranosyl-(1→4)-β-D-glucopyranoside], 5-O-[4-hydroxybenzoyl-(→2)-β-D-glucopyranoside]	C45H46O23
📖	2,8-Dihydroxyxanthone-1-carboxylic acid	C14H8O6
📖	2,8-Dihydroxyxanthone-1-carboxylic acid; Me ester	C15H10O6
📖	2,8-Dihydroxyxanthone-1-carboxylic acid; 2-Me ether, Me ester	C16H12O6
📖	2,8-Dihydroxyxanthone-1-carboxylic acid; 2-Me ether, Me ester, Ac
📖	2,5-Dihydroxyxanthone-4,6-dicarboxylic acid	C15H8O8
📖	2,5-Dihydroxyxanthone-4,6-dicarboxylic acid; 1''-Me ester	C16H10O8
📖	2,8-Dihydroxyxanthone-1,6-dicarboxylic acid	C15H8O8
📖	2,8-Dihydroxyxanthone-1,6-dicarboxylic acid; Di-Me ester	C17H12O8
📖	2,8-Dihydroxyxanthone-1,6-dicarboxylic acid; Di-Me ether, di-Me ester	C19H16O8
📖	2,8-Dihydroxyxanthone-1,6-dicarboxylic acid; 1-Me ester	C16H10O8
📖	Dilatatin	C19H18O11
📖	5-(3,7-Dimethyl-2,6-octadienyl)-1,2,3,6,8-pentahydroxyxanthone	C23H24O7
📖	5-(3,7-Dimethyl-2,6-octadienyl)-1,2,3,6,8-pentahydroxyxanthone; (E)-form	C23H24O7
📖	5-(3,7-Dimethyl-2,6-octadienyl)-1,2,3,6,8-pentahydroxyxanthone; (E)-form, 2,3-Methylene ether	C24H24O7
📖	1-(3,7-Dimethyl-2,6-octadienyl)-2,3,6,8-tetrahydroxy-7-(3-methyl-2-butenyl)xanthone	C28H32O6
📖	1-(3,7-Dimethyl-2,6-octadienyl)-2,3,6,8-tetrahydroxy-7-(3-methyl-2-butenyl)xanthone; (E)-form	C28H32O6
📖	1-(3,7-Dimethyl-2,6-octadienyl)-2,3,6,8-tetrahydroxy-7-(3-methyl-2-butenyl)xanthone; (E)-form, 4''-Acetoxy, 2-Me ether	C31H36O8
📖	1-(3,7-Dimethyl-2,6-octadienyl)-2,3,6,8-tetrahydroxy-7-(3-methyl-2-butenyl)xanthone; (E)-form, 2',3'-Dihydro, 3'ξ,4''Z-dihydroxy, 2-Me ether	C29H36O8
📖	1-(3,7-Dimethyl-2,6-octadienyl)-2,3,6,8-tetrahydroxy-7-(3-methyl-2-butenyl)xanthone; (E)-form, 6',7'-Dihydro, 4'',7'-dihydroxy, 2-Me ether	C29H36O8
📖	1-(3,7-Dimethyl-2,6-octadienyl)-2,3,6,8-tetrahydroxy-7-(3-methyl-2-butenyl)xanthone; (E)-form, 2,3-Di-Me ether	C30H36O6
📖	1-(3,7-Dimethyl-2,6-octadienyl)-2,3,6,8-tetrahydroxy-7-(3-methyl-2-butenyl)xanthone; (E)-form, 4''-Hydroxy, 2-Me ether	C29H34O7
📖	1-(3,7-Dimethyl-2,6-octadienyl)-2,3,6,8-tetrahydroxy-7-(3-methyl-2-butenyl)xanthone; (E)-form, 8'-Hydroxy, 2-Me ether	C29H34O7
📖	1-(3,7-Dimethyl-2,6-octadienyl)-2,3,6,8-tetrahydroxy-7-(3-methyl-2-butenyl)xanthone; (E)-form, Δ3''-Isomer, 2''ξ-hydroxy 2-Me ether	C29H34O7
📖	1-(3,7-Dimethyl-2,6-octadienyl)-2,3,6,8-tetrahydroxy-7-(3-methyl-2-butenyl)xanthone; (E)-form, 2-Me ether	C29H34O6
📖	2-(3,7-Dimethyl-2,6-octadienyl)-1,3,6,7-tetrahydroxy-8-(3-methyl-2-butenyl)xanthone	C28H32O6
📖	2-(3,7-Dimethyl-2,6-octadienyl)-1,3,6,7-tetrahydroxy-8-(3-methyl-2-butenyl)xanthone; (E)-form	C28H32O6
📖	2-(3,7-Dimethyl-2,6-octadienyl)-1,3,6,7-tetrahydroxy-8-(3-methyl-2-butenyl)xanthone; (E)-form, 7-Me ether	C29H34O6
📖	5-(3,7-Dimethyl-2,6-octadienyl)-2,3,6,8-tetrahydroxy-1-(3-methyl-2-butenyl)xanthone	C28H32O6
📖	5-(3,7-Dimethyl-2,6-octadienyl)-2,3,6,8-tetrahydroxy-1-(3-methyl-2-butenyl)xanthone; (E)-form	C28H32O6
📖	5-(3,7-Dimethyl-2,6-octadienyl)-2,3,6,8-tetrahydroxy-1-(3-methyl-2-butenyl)xanthone; (E)-form, 2-Me ether	C29H34O6
📖	6-(3,7-Dimethyl-2,6-octadienyl)-1,3,5,7-tetrahydroxy-2-(3-methyl-2-butenyl)xanthone	C28H32O6
📖	6-(3,7-Dimethyl-2,6-octadienyl)-1,3,5,7-tetrahydroxy-2-(3-methyl-2-butenyl)xanthone; (E)-form	C28H32O6
📖	6-(3,7-Dimethyl-2,6-octadienyl)-1,3,5,7-tetrahydroxy-2-(3-methyl-2-butenyl)xanthone; (E)-form, 2'',3'',6'',7''-Tetrahydro, 3''ξ,4',7''-trihydroxy, 7-Me ether	C29H38O9
📖	8-(3,7-Dimethyl-2,6-octadienyl)-1,3,5,7-tetrahydroxy-2-(3-methyl-2-butenyl)xanthone	C28H32O6
📖	8-(3,7-Dimethyl-2,6-octadienyl)-1,3,5,7-tetrahydroxy-2-(3-methyl-2-butenyl)xanthone; (E)-form	C28H32O6
📖	1-(3,7-Dimethyl-2,6-octadienyl)-2,3,6,8-tetrahydroxy-5-prenylxanthone	C28H32O6
📖	1-(3,7-Dimethyl-2,6-octadienyl)-2,3,6,8-tetrahydroxy-5-prenylxanthone; (E)-form	C28H32O6
📖	1-(3,7-Dimethyl-2,6-octadienyl)-2,3,6,8-tetrahydroxy-5-prenylxanthone; (E)-form, 2-Me ether	C29H34O6
📖	1-(3,7-Dimethyl-2,6-octadienyl)-2,3,6,8-tetrahydroxy-5-prenylxanthone; (E)-form, 2-Me ether, 4''-hydroxy	C29H34O7
📖	2-(3,7-Dimethyl-2,6-octadienyl)-1,3,5,8-tetrahydroxy-4-prenylxanthone	C28H32O6
📖	2-(3,7-Dimethyl-2,6-octadienyl)-1,3,5,8-tetrahydroxy-4-prenylxanthone; (E)-form	C28H32O6
📖	4-(3,7-Dimethyl-2,6-octadienyl)-2,3,6,8-tetrahydroxy-1-prenylxanthone	C28H32O6
📖	4-(3,7-Dimethyl-2,6-octadienyl)-2,3,6,8-tetrahydroxy-1-prenylxanthone; (E)-form	C28H32O6
📖	4-(3,7-Dimethyl-2,6-octadienyl)-3,5,6,8-tetrahydroxy-1-prenylxanthone	C28H32O6
📖	4-(3,7-Dimethyl-2,6-octadienyl)-3,5,6,8-tetrahydroxy-1-prenylxanthone; (E)-form	C28H32O6
📖	4-(3,7-Dimethyl-2,6-octadienyl)-3,5,6,8-tetrahydroxy-1-prenylxanthone; (E)-form, 6-Me ether	C29H34O6
📖	1-(3,7-Dimethyl-2,6-octadienyl)-2,3,6,8-tetrahydroxyxanthone	C23H24O6
📖	1-(3,7-Dimethyl-2,6-octadienyl)-2,3,6,8-tetrahydroxyxanthone; (E)-form	C23H24O6
📖	1-(3,7-Dimethyl-2,6-octadienyl)-2,3,6,8-tetrahydroxyxanthone; (E)-form, 2',3'-Dihydro, 3'ξ-hydroxy, 2-Me ether	C24H28O7
📖	1-(3,7-Dimethyl-2,6-octadienyl)-2,3,6,8-tetrahydroxyxanthone; (E)-form, 6',7'-Dihydro, 7'-hydroxy, 2-Me ether	C24H28O7
📖	1-(3,7-Dimethyl-2,6-octadienyl)-2,3,6,8-tetrahydroxyxanthone; (E)-form, Δ3',10'-Isomer, 2'ξ-hydroxy, 2-Me ether	C24H26O7
📖	1-(3,7-Dimethyl-2,6-octadienyl)-2,3,6,8-tetrahydroxyxanthone; (E)-form, Δ5'-Isomer, 7'-hydroxy, 2-Me ether	C24H26O7
📖	1-(3,7-Dimethyl-2,6-octadienyl)-2,3,6,8-tetrahydroxyxanthone; (E)-form, Δ7'-Isomer, 6'ξ-hydroxy, 2-Me ether	C24H26O7
📖	1-(3,7-Dimethyl-2,6-octadienyl)-2,3,6,8-tetrahydroxyxanthone; (E)-form, Δ3'-Isomer(E-), 2'-oxo, 2-Me ether	C24H24O7
📖	1-(3,7-Dimethyl-2,6-octadienyl)-2,3,6,8-tetrahydroxyxanthone; (E)-form, Δ3',10'-Isomer, 2'-oxo, 2-Me ether	C24H24O7
📖	1-(3,7-Dimethyl-2,6-octadienyl)-2,3,6,8-tetrahydroxyxanthone; (E)-form, Δ7'-Isomer, 6'-oxo, 2-Me ether	C24H24O7
📖	1-(3,7-Dimethyl-2,6-octadienyl)-2,3,6,8-tetrahydroxyxanthone; (E)-form, 2-Me ether	C24H26O6
📖	1-(3,7-Dimethyl-2,6-octadienyl)-2,3,6,8-tetrahydroxyxanthone; (E)-form, 2-Me ether, 6',7'-epoxide	C24H26O7
📖	2-(3,7-Dimethyl-2,6-octadienyl)-1,3,5,8-tetrahydroxyxanthone	C23H24O6
📖	2-(3,7-Dimethyl-2,6-octadienyl)-1,3,5,8-tetrahydroxyxanthone; (E)-form	C23H24O6
📖	2-(3,7-Dimethyl-2,6-octadienyl)-1,3,6,7-tetrahydroxyxanthone	C23H24O6
📖	2-(3,7-Dimethyl-2,6-octadienyl)-1,3,6,7-tetrahydroxyxanthone; (E)-form	C23H24O6
📖	2-(3,7-Dimethyl-2,6-octadienyl)-1,3,6,7-tetrahydroxyxanthone; (E)-form, 3,7-Di-Me ether	C25H28O6
📖	2-(3,7-Dimethyl-2,6-octadienyl)-1,3,6,7-tetrahydroxyxanthone; (E)-form, 7-Me ether	C24H26O6
📖	2-(3,7-Dimethyl-2,6-octadienyl)-3,4,6,8-tetrahydroxyxanthone	C23H24O6
📖	2-(3,7-Dimethyl-2,6-octadienyl)-3,4,6,8-tetrahydroxyxanthone; (E)-form	C23H24O6
📖	2-(3,7-Dimethyl-2,6-octadienyl)-3,4,6,8-tetrahydroxyxanthone; (E)-form, 6-Me ether	C24H26O6
📖	4-(3,7-Dimethyl-2,6-octadienyl)-1,3,5,6-tetrahydroxyxanthone	C23H24O6
📖	4-(3,7-Dimethyl-2,6-octadienyl)-1,3,5,6-tetrahydroxyxanthone; (E)-form	C23H24O6
📖	4-(3,7-Dimethyl-2,6-octadienyl)-1,3,5,8-tetrahydroxyxanthone	C23H24O6
📖	4-(3,7-Dimethyl-2,6-octadienyl)-1,3,5,8-tetrahydroxyxanthone; (E)-form	C23H24O6
📖	4-(3,7-Dimethyl-2,6-octadienyl)-1,3,5,8-tetrahydroxyxanthone; (E)-form, Δ7'-Isomer, 6'R-hydroxy	C23H24O7
📖	4-(3,7-Dimethyl-2,6-octadienyl)-1,3,5,8-tetrahydroxyxanthone; (E)-form, 3-Me ether	C24H26O6
📖	7-(3,7-Dimethyl-2,6-octadienyl)-1,2,5,6-tetrahydroxyxanthone	C23H24O6
📖	7-(3,7-Dimethyl-2,6-octadienyl)-1,2,5,6-tetrahydroxyxanthone; (E)-form	C23H24O6
📖	7-(3,7-Dimethyl-2,6-octadienyl)-1,3,5,6-tetrahydroxyxanthone	C23H24O6
📖	7-(3,7-Dimethyl-2,6-octadienyl)-1,3,5,6-tetrahydroxyxanthone; (E)-form	C23H24O6
📖	8-(3,7-Dimethyl-2,6-octadienyl)-1,3,6-trihydroxy-2-(3-methyl-2-butenyl)xanthone	C28H32O5
📖	8-(3,7-Dimethyl-2,6-octadienyl)-1,3,6-trihydroxy-2-(3-methyl-2-butenyl)xanthone; (E)-form	C28H32O5
📖	1-(3,7-Dimethyl-2,6-octadienyl)-2,6,8-trihydroxyxanthone	C23H24O5
📖	1-(3,7-Dimethyl-2,6-octadienyl)-2,6,8-trihydroxyxanthone; (E)-form	C23H24O5
📖	2-(3,7-Dimethyl-2,6-octadienyl)-1,3,5-trihydroxyxanthone	C23H24O5
📖	2-(3,7-Dimethyl-2,6-octadienyl)-1,3,5-trihydroxyxanthone; (E)-form	C23H24O5
📖	3-(3,7-Dimethyl-2,6-octadienyl)-1,4,8-trihydroxyxanthone	C23H24O5
📖	3-(3,7-Dimethyl-2,6-octadienyl)-1,4,8-trihydroxyxanthone; (E)-form	C23H24O5
📖	4-(3,7-Dimethyl-2,6-octadienyl)-1,3,5-trihydroxyxanthone	C23H24O5
📖	4-(3,7-Dimethyl-2,6-octadienyl)-1,3,5-trihydroxyxanthone; (E)-form	C23H24O5
📖	4-(3,7-Dimethyl-2,6-octadienyl)-1,3,7-trihydroxyxanthone	C23H24O5
📖	4-(3,7-Dimethyl-2,6-octadienyl)-1,3,7-trihydroxyxanthone; (E)-form	C23H24O5
📖	9-(1,1-Dimethyl-2-propenyl)-2,3-dihydro-3,6,7,11-tetrahydroxy-2-(1-hydroxy-1-methylethyl)-5H-furo[3,2-b]xanthen-5-one	C23H24O8
📖	4-(1,1-Dimethyl-2-propenyl)-1,3,5,6-tetrahydroxy-7-prenylxanthone	C23H24O6
📖	2-(1,1-Dimethyl-2-propenyl)-1,3,6,7-tetrahydroxyxanthone	C18H16O6
📖	2-(1,1-Dimethyl-2-propenyl)-1,3,6,7-tetrahydroxyxanthone; 3-Me ether	C19H18O6
📖	2-(1,1-Dimethyl-2-propenyl)-1,4,5,6-tetrahydroxyxanthone	C18H16O6
📖	4-(1,1-Dimethyl-2-propenyl)-1,2,5,6-tetrahydroxyxanthone	C18H16O6
📖	4-(1,1-Dimethyl-2-propenyl)-1,2,5,6-tetrahydroxyxanthone; 1,6-Di-Me	C20H20O6
📖	4-(1,1-Dimethyl-2-propenyl)-1,2,5,6-tetrahydroxyxanthone; 1-Me ether	C19H18O6
📖	4-(1,1-Dimethyl-2-propenyl)-1,2,5,8-tetrahydroxyxanthone	C18H16O6
📖	4-(1,1-Dimethyl-2-propenyl)-1,2,5,8-tetrahydroxyxanthone; 1-Me ether	C19H18O6
📖	4-(1,1-Dimethyl-2-propenyl)-1,3,5,6-tetrahydroxyxanthone	C18H16O6
📖	4-(1,1-Dimethyl-2-propenyl)-1,3,5,6-tetrahydroxyxanthone; 3,6-Di-Me ether	C20H20O6
📖	4-(1,1-Dimethyl-2-propenyl)-1,3,5,6-tetrahydroxyxanthone; 3-Me ether	C19H18O6
📖	4-(1,1-Dimethyl-2-propenyl)-1,3,5,6-tetrahydroxyxanthone; 5-Me ether	C19H18O6
📖	4-(1,1-Dimethyl-2-propenyl)-1,3,5,8-tetrahydroxyxanthone	C18H16O6
📖	4-(1,1-Dimethyl-2-propenyl)-1,3,6,7-tetrahydroxyxanthone	C18H16O6
📖	4-(1,1-Dimethyl-2-propenyl)-1,3,6,7-tetrahydroxyxanthone; 3-Me ether	C19H18O6
📖	4-(1,1-Dimethyl-2-propenyl)-1,3,6,7-tetrahydroxyxanthone; 6-Me ether	C19H18O6
📖	3-(1,1-Dimethyl-2-propenyl)-5,9,11-trihydroxy-2,2-dimethyl-10-(3-methyl-2-butenyl)-2H,12H-pyrano[2,3-a]xanthen-12-one	C28H30O6
📖	3-(1,1-Dimethyl-2-propenyl)-5,9,11-trihydroxy-2,2-dimethyl-10-(3-methyl-2-butenyl)-2H,12H-pyrano[2,3-a]xanthen-12-one; Δ3''-Isomer, 2''ξ-hydroxy	C28H30O7
📖	10-(1,1-Dimethyl-2-propenyl)-7,9,12-trihydroxy-2,2-dimethyl-8-(3-methyl-2-butenyl)-2H,6H-pyrano[3,2-b]xanthen-6-one	C28H30O6
📖	11-(1,1-Dimethyl-2-propenyl)-5,8,10-trihydroxy-3,3-dimethyl-3H,7H-pyrano[2,3-c]xanthen-7-one	C23H22O6
📖	2-(1,1-Dimethyl-2-propenyl)-1,4,5-trihydroxyxanthone	C18H16O5
📖	4-(1,1-Dimethyl-2-propenyl)-1,2,7-trihydroxyxanthone	C18H16O5
📖	4-(1,1-Dimethyl-2-propenyl)-1,3,5-trihydroxyxanthone	C18H16O5
📖	Dioschrin	C33H26O13S
📖	Dombakinaxanthone	C28H30O5
📖	Dombakinaxanthone; 5''-Acetoxy(2''E-), 9-hydroxy	C30H32O8
📖	Dombakinaxanthone; 8-Deoxy, 9,10-dihydroxy	C28H30O6
📖	Dombakinaxanthone; 4'',9-Dihydroxy(2''Z-)	C28H30O7
📖	Dombakinaxanthone; 9-Hydroxy	C28H30O6
📖	Dombakinaxanthone; Δ3'-Isomer, 2'ξ,4'',9-trihydroxy(2''Z-)	C28H30O8
📖	Dombakinaxanthone; 2'ξ,3',4'',9-Tetrahydroxy(2''Z-), 2',3'-dihydro	C28H32O9
📖	Dulciol B	C28H32O6
📖	Dulciol B; 2',3'-Dihydro, 3'-hydroxy	C28H34O7
📖	Dulciol E	C18H16O5
📖	Dulciol E; (±)-form	C18H16O5
📖	Dulcisxanthone A	C28H30O5
📖	Dulcisxanthone H	C23H22O5
📖	Dulxanthone F	C21H20O7
📖	Dulxanthone F; 7-Demethoxy, 8-methoxy, 9-O-de-Me	C20H18O7
📖	Dulxanthone F; 8-Methoxy	C22H22O8
📖	Dulxanthone F; 12-Methoxy	C22H22O8
📖	Dulxanthone F; 8-Methoxy, 9-O-de-Me	C21H20O8
📖	Dulxanthone F; 12-Methoxy, 7-O-de-Me, 5-Me ether	C22H22O8
📖	Emericellin	C25H28O5
📖	Emericellin; 2',3'-Epoxide	C25H28O6
📖	Epiisoshamixanthone	C25H26O5
📖	Epiisoshamixanthone; 1-Me ether
📖	Euxanmodin A	C28H16O9
📖	Euxanmodin B	C28H16O9
📖	5-Farnesyltoxyloxanthone B	C33H38O6
📖	Flavoramulone	C19H20O8
📖	Forbexanthone	C19H16O6
📖	Forbexanthone; O-De-Me	C18H14O6
📖	Forbexanthone; Demethoxy	C18H14O5
📖	Forbexanthone; Demethoxy, 12-Me ether	C19H16O5
📖	Forbexanthone; 3,4-Dihydro, 3R*,4R*-dihydroxy, O-de-Me	C18H16O8
📖	Forbexanthone; 3,4-Dihydro, 3R,4S-dihydroxy, O-de-Me	C18H16O8
📖	Formoxanthone B	C28H30O5
📖	Formoxanthone C	C23H24O6
📖	Formoxanthone C; 5-Deoxy, 7-hydroxy, 1-Me ether	C24H26O6
📖	Formoxanthone C; 5-Me ether	C24H26O6
📖	7-Formyl-2,9-dihydroxyxanthone-1-carboxylic acid	C15H8O7
📖	7-Formyl-2,9-dihydroxyxanthone-1-carboxylic acid; Di-Me acetal, Me ester	C18H16O8
📖	Fuscaxanthone A	C29H32O6
📖	Fuscaxanthone A; 3',4'-Dihydro	C29H34O6
📖	Fuscaxanthone A; 3',4'-Dihydro, 3'ξ-hydroxy	C29H34O7
📖	Fuscaxanthone A; 3',4'-Dihydro, 3'ξ-hydroxy, O-de-Me, 1-Me ether	C29H34O7
📖	Fuscaxanthone G	C29H34O6
📖	Fuscaxanthone G; 6'',7''-Dihydro, 7''-hydroxy	C29H36O7
📖	Fuscaxanthone H	C29H36O7
📖	Garceduxanthone	C24H26O6
📖	Garcicowanone B	C28H30O6
📖	Garciduol A	C27H18O9
📖	Garciduol A; 3''-Hydroxy	C27H18O10
📖	Garciduol C	C27H18O9
📖	Garcigerrin A	C23H24O7
📖	Garcigerrin A; 4-Epimer	C23H24O7
📖	Garcihombronone A	C15H8O6
📖	Garcilivin A	C36H28O10
📖	Garcilivin A; 2'''-Epimer	C36H28O10
📖	Garcilivin B	C36H28O10
📖	Garcimangosone A	C28H28O6
📖	Garcimangosone C	C23H24O7
📖	Garcineflavanone A	C58H38O17
📖	Garcineflavonol A	C43H24O15
📖	Garcinenone A	C18H14O6
📖	Garcinenone A; 3,4-Dihydro, 12-Me ether	C19H18O6
📖	Garcinenone A; 12-Me ether	C19H16O6
📖	Garcinenone A; 5-Methoxy, 3,4-dihydro, 12-Me ether	C20H20O7
📖	Garcinenone B	C25H24O6
📖	Garcinenone B; 2'',3''-Dihydro, 3''-hydroxy	C25H26O7
📖	Garcinenone Y	C28H32O7
📖	Garcinenone Y; (ξ)-form	C28H32O7
📖	Garcinenone Y; (ξ)-form, 2'',3''-Dihydro, 3''-hydroxy	C28H34O8
📖	Garcinexanthone F	C18H12O8
📖	Garciniacowone C	C24H24O6
📖	Garciniacowone D	C28H28O6
📖	Garciniafuran	C22H20O6
📖	Garciniafuran; O3-De-Me	C21H18O6
📖	Garciniaxanthone I	C24H26O7
📖	Garciniaxanthone A	C23H24O5
📖	Garciniaxanthone B	C23H22O5
📖	Garciniaxanthone D	C23H24O7
📖	Garciniaxanthone E	C28H32O6
📖	Garciniaxanthone E; 2'',3''-Dihydro, 3''-hydroxy	C28H34O7
📖	Garciniaxanthone F	C24H24O6
📖	Garciniaxanthone G	C20H16O5
📖	Garcinone A	C23H24O5
📖	Garcinone B	C23H22O6
📖	Garcinone B; 3',4'-Dihydro	C23H24O6
📖	Garcinone B; 2'',3''-Dihydro, 3''-hydroxy	C23H24O7
📖	Garcinone B; 3',4'-Dihydro, 3-Me ether	C24H26O6
📖	Garcinone B; 3-Me ether	C24H24O6
📖	Garciobioxanthone	C37H32O13
📖	Gemixanthone A	C26H24O11
📖	2-Geranyl-1,3,6,7-tetrahydroxy-5-prenylxanthone	C28H32O6
📖	4-Geranyl-1,3,5,8-tetrahydroxy-2-prenylxanthone	C28H32O6
📖	4-Geranyl-1,3,6,7-tetrahydroxy-2-prenylxanthone	C28H32O6
📖	5-Geranyl-1,3,6,7-tetrahydroxy-2-prenylxanthone	C28H32O6
📖	2-Geranyl-1,3,5-trihydroxy-4-prenylxanthone	C28H32O5
📖	2-Geranyl-1,3,7-trihydroxy-4-prenylxanthone	C28H32O5
📖	4-Geranyl-1,3,7-trihydroxy-2-prenylxanthone	C28H32O5
📖	4-Geranyl-1,3,7-trihydroxy-2-prenylxanthone; 3-Me ether	C29H34O5
📖	8-Geranyl-1,3,7-trihydroxy-2-prenylxanthone	C28H32O5
📖	Gerontoxanthone I	C23H24O6
📖	Gerontoxanthone I; 6-Deoxy	C23H24O5
📖	Gerontoxanthone I; Δ3'-Isomer, 2'ξ-hydroxy	C23H24O7
📖	Gerontoxanthone I; Δ3'-Isomer, 2'ξ-hydroxy, 3-Me ether	C24H26O7
📖	Gerontoxanthone I; 3-Me ether	C24H26O6
📖	Gerontoxanthone A	C23H22O6
📖	Gerontoxanthone B	C23H22O6
📖	Gerontoxanthone C	C23H24O6
📖	Gerontoxanthone C; 6-Deoxy	C23H24O5
📖	Gerontoxanthone D	C19H18O7
📖	Gerontoxanthone G	C23H24O6
📖	Gerontoxanthone G; 5-Me ether	C24H26O6
📖	Globulixanthone A	C19H16O5
📖	Globulixanthone B	C23H22O5
📖	Globulixanthone E	C37H30O9
📖	Globuxanthone	C18H16O5
📖	Globuxanthone; 1-Me ether	C19H18O5
📖	Globuxanthone; 2-Me ether	C19H18O5
📖	Glomexanthone A	C41H44O22
📖	Glomexanthone A; 7',8'-Diepimer	C41H44O22
📖	Glomexanthone A; 5'-Methoxy	C42H46O23
📖	3-Glucosyl-1,7-dihydroxyxanthone	C19H18O9
📖	3-Glucosyl-1,7-dihydroxyxanthone; 7-Me ether	C20H20O9
📖	4-Glucosyl-1,7-dihydroxyxanthone	C19H18O9
📖	2-Glucosyl-1,3,5,6-tetrahydroxyxanthone	C19H18O11
📖	2-Glucosyl-1,3,5,6-tetrahydroxyxanthone; 5-Me ether	C20H20O11
📖	2-Glucosyl-1,3,5,6-tetrahydroxyxanthone; 3,5,6-Tri-Me ether	C22H24O11
📖	2-Glucosyl-1,3,5,6-tetrahydroxyxanthone; 3,5,6-Tri-Me ether, 7-methoxy	C23H26O12
📖	8-Glucosyl-1,3,4,6-tetrahydroxyxanthone	C19H18O11
📖	1-Glucosyl-3,6,8-trihydroxyxanthone	C19H18O10
📖	2-Glucosyl-1,3,7-trihydroxyxanthone	C19H18O10
📖	2-Glucosyl-1,3,7-trihydroxyxanthone; 2'-O-β-D-Apiofuranosyl	C24H26O14
📖	2-Glucosyl-1,3,7-trihydroxyxanthone; 6'-O-β-D-Apiofuranosyl	C24H26O14
📖	4-Glucosyl-1,3,7-trihydroxyxanthone	C19H18O10
📖	Gossampinusxanthone	C19H18O11
📖	Griffipavixanthone	C36H28O12
📖	Guayin	C30H22O6
📖	Hanburixanthone	C33H40O6
📖	3-Heptadecyl-4-hydroxyxanthone	C30H42O3
📖	3-Heptadecyl-4-hydroxyxanthone; Me ether	C31H44O3
📖	1,2,3,4,5,6,8-Heptahydroxyxanthone	C13H8O9
📖	1,2,3,4,5,6,8-Heptahydroxyxanthone; 4-O-(3-Methyl-2-butenyl), 1,2,3,5,6-penta-Me ether	C23H26O9
📖	1,2,3,4,5,6,8-Heptahydroxyxanthone; 1,2,3,5,6-Penta-Me ether	C18H18O9
📖	1,2,3,4,6,7,8-Heptahydroxyxanthone	C13H8O9
📖	1,2,3,4,6,7,8-Heptahydroxyxanthone; 1,2,3,6,7-Penta-Me ether	C18H18O9
📖	1,2,3,4,6,7,8-Heptahydroxyxanthone; 2,3,4,7-Tetra-Me ether	C17H16O9
📖	1,1',6,6',8,8'-Hexahydroxy-3,3'-bis(2-oxopropyl)[2,2'-bi-9H-xanthene]-9,9'-dione	C32H22O12
📖	1,2,3,4,5,7-Hexahydroxyxanthone	C13H8O8
📖	1,2,3,4,5,7-Hexahydroxyxanthone; 2,3,4,5,7-Penta-Me ether	C18H18O8
📖	1,2,3,4,5,7-Hexahydroxyxanthone; 2,3,4,5,7-Penta-Me ether, 1-O-[β-D-glucopyranosyl-(1→6)-β-D-glucopyranoside]	C30H38O18
📖	1,2,3,4,5,7-Hexahydroxyxanthone; 2,3,4,5,7-Penta-Me ether, 1-O-[β-D-xylopyranosyl-(1→6)-β-D-glucopyranoside]	C29H36O17
📖	1,2,3,4,5,7-Hexahydroxyxanthone; 2,3,4,5-Tetra-Me ether	C17H16O8
📖	1,2,3,4,5,7-Hexahydroxyxanthone; 2,4,5,7-Tetra-Me ether	C17H16O8
📖	1,2,3,4,5,7-Hexahydroxyxanthone; 2,3,4,5-Tetra-Me ether, 1-O-[β-D-glucopyranosyl-(1→6)-β-D-glucopyranoside]	C29H36O18
📖	1,2,3,4,5,7-Hexahydroxyxanthone; 2,3,4,5-Tetra-Me ether, 1-O-[β-D-xylopyranosyl-(1→6)-β-D-glucopyranoside]	C28H34O17
📖	1,2,3,4,5,8-Hexahydroxyxanthone	C13H8O8
📖	1,2,3,4,5,8-Hexahydroxyxanthone; 2,3-Methylene, 4,5-di-Me ether	C16H12O8
📖	1,2,3,4,6,7-Hexahydroxyxanthone	C13H8O8
📖	1,2,3,4,6,7-Hexahydroxyxanthone; Hexa-Me ether	C19H20O8
📖	1,2,3,4,6,8-Hexahydroxyxanthone	C13H8O8
📖	1,2,3,4,6,8-Hexahydroxyxanthone; Hexa-Me ether	C19H20O8
📖	1,2,3,4,6,8-Hexahydroxyxanthone; 1,2,3,4,6-Penta-Me ether	C18H18O8
📖	1,2,3,4,6,8-Hexahydroxyxanthone; 1,2,3,4,6-Penta-Me ether, 8-O-[α-L-rhamnopyranosyl-(1→6)-β-D-glucopyranoside]	C30H38O17
📖	1,2,3,4,6,8-Hexahydroxyxanthone; 1,2,3,4,6-Penta-Me ether, 8-O-[β-D-xylopyranosyl-(1→6)-β-D-glucopyanoside]	C29H36O17
📖	1,2,3,4,6,8-Hexahydroxyxanthone; 1,2,4,6-Tetra-Me ether	C17H16O8
📖	1,2,3,4,6,8-Hexahydroxyxanthone; 2,3,4,6-Tetra-Me ether	C17H16O8
📖	1,2,3,4,6,8-Hexahydroxyxanthone; 2,3,4,8-Tetra-Me ether	C17H16O8
📖	1,2,3,4,6,8-Hexahydroxyxanthone; 2,3,6-Tri-Me ether	C16H14O8
📖	1,2,3,4,6,8-Hexahydroxyxanthone; 2,4,6-Tri-Me ether	C16H14O8
📖	1,2,3,5,6,7-Hexahydroxyxanthone	C13H8O8
📖	1,2,3,5,6,7-Hexahydroxyxanthone; 1,2,5,6,7-Penta-Me ether	C18H18O8
📖	1,2,3,5,6,7-Hexahydroxyxanthone; 2,5,6,7-Tetra-Me ether	C17H16O8
📖	1,2,3,5,6,7-Hexahydroxyxanthone; 2,5,7-Tri-Me ether	C16H14O8
📖	1,2,3,5,6,8-Hexahydroxyxanthone	C13H8O8
📖	1,2,3,5,6,8-Hexahydroxyxanthone; 2,5-Di-Me ether	C15H12O8
📖	1,2,3,6,7,8-Hexahydroxyxanthone	C13H8O8
📖	1,2,3,6,7,8-Hexahydroxyxanthone; 2,7-Di-Me ether	C15H12O8
📖	1,2,3,6,7,8-Hexahydroxyxanthone; 2,3-Methylene, 7,8-di-Me ether	C16H12O8
📖	1,2,3,6,7,8-Hexahydroxyxanthone; 2,3-Methylene, 7-Me ether	C15H10O8
📖	1,2,3,6,7,8-Hexahydroxyxanthone; 1,2,7,8-Tetra-Me ether	C17H16O8
📖	1,2,3,6,7,8-Hexahydroxyxanthone; 1,2,7-Tri-Me ether	C16H14O8
📖	16-Hydroxycudratrixanthone Q	C23H24O8
📖	16-Hydroxycudratrixanthone Q; 1'-Deoxy	C23H24O7
📖	16-Hydroxycudratrixanthone Q; 1'-Deoxy, 1',2'-didehydro	C23H22O7
📖	1-Hydroxy-4,7-dimethoxy-6-(3-oxobutyl)xanthone	C19H18O6
📖	8-Hydroxy-6-(2-hydroxyethyl)xanthone-1-carboxylic acid	C16H12O6
📖	8-Hydroxy-6-(2-hydroxyethyl)xanthone-1-carboxylic acid; Me ester	C17H14O6
📖	8-Hydroxy-1-(hydroxymethyl)-3-methylxanthone	C15H12O4
📖	2-Hydroxy-7-(hydroxymethyl)-3-[[2-O-(stigmast-5-en-3-yl)-β-D-glucopyranosyl]oxy]xanthone-1,8-dicarboxylic acid	C51H68O14
📖	8-Hydroxy-3-(hydroxymethyl)xanthone-1-carboxylic acid	C15H10O6
📖	8-Hydroxy-3-(hydroxymethyl)xanthone-1-carboxylic acid; Me ester	C16H12O6
📖	8-Hydroxy-6-(hydroxymethyl)xanthone-1-carboxylic acid	C15H10O6
📖	8-Hydroxy-6-(hydroxymethyl)xanthone-1-carboxylic acid; 2-Chloro, Me ester	C16H11ClO6
📖	8-Hydroxy-6-(hydroxymethyl)xanthone-1-carboxylic acid; Me ester	C16H12O6
📖	8-Hydroxy-6-(hydroxymethyl)xanthone-1-carboxylic acid; 8-Me ether, Me ester	C17H14O6
📖	8-Hydroxy-6-(hydroxymethyl)xanthone-1-carboxylic acid; 2-(Methylsulfinyl), Me ester	C17H14O7S
📖	8-Hydroxy-6-(hydroxymethyl)xanthone-1-carboxylic acid; 2-(Methylthio), 1'-Ac, Me ester	C19H16O7S
📖	8-Hydroxy-6-(hydroxymethyl)xanthone-1-carboxylic acid; 2-(Methylthio), Me ester	C17H14O6S
📖	1-Hydroxy-3-methylxanthone	C14H10O3
📖	1-Hydroxy-3-methylxanthone; Ac
📖	1-Hydroxy-3-methylxanthone; Me ether	C15H12O3
📖	8-Hydroxy-3-methylxanthone-1-carboxylic acid	C15H10O5
📖	8-Hydroxy-3-methylxanthone-1-carboxylic acid; Me ester	C16H12O5
📖	8-Hydroxy-6-methylxanthone-1-carboxylic acid	C15H10O5
📖	8-Hydroxy-6-methylxanthone-1-carboxylic acid; 5-Chloro, Me ester	C16H11ClO5
📖	8-Hydroxy-6-methylxanthone-1-carboxylic acid; Me ester	C16H12O5
📖	8-Hydroxy-6-(2-oxopropyl)xanthone-1-carboxylic acid	C17H12O6
📖	8-Hydroxy-6-(2-oxopropyl)xanthone-1-carboxylic acid; Me ester	C18H14O6
📖	1-Hydroxyxanthone	C13H8O3
📖	1-Hydroxyxanthone; Ac	C15H10O4
📖	1-Hydroxyxanthone; Benzoyl	C20H12O4
📖	1-Hydroxyxanthone; Me ether	C14H10O3
📖	2-Hydroxyxanthone	C13H8O3
📖	2-Hydroxyxanthone; Ac	C15H10O4
📖	2-Hydroxyxanthone; Et ether	C15H12O3
📖	2-Hydroxyxanthone; Me ether	C14H10O3
📖	3-Hydroxyxanthone	C13H8O3
📖	3-Hydroxyxanthone; Ac	C15H10O4
📖	3-Hydroxyxanthone; 2-Hydroxyethyl ether	C15H12O4
📖	3-Hydroxyxanthone; Me ether	C14H10O3
📖	4-Hydroxyxanthone	C13H8O3
📖	4-Hydroxyxanthone; Ac	C15H10O4
📖	4-Hydroxyxanthone; Me ether	C14H10O3
📖	6-Hydroxyxanthone-2-carboxylic acid	C14H8O5
📖	6-Hydroxyxanthone-2-carboxylic acid; Me ether, Me ester	C16H12O5
📖	8-Hydroxyxanthone-1-carboxylic acid	C14H8O5
📖	8-Hydroxyxanthone-1-carboxylic acid; Et ester	C16H12O5
📖	8-Hydroxyxanthone-1-carboxylic acid; Me ester	C15H10O5
📖	8-Hydroxyxanthone-1,3-dicarboxylic acid	C15H8O7
📖	8-Hydroxyxanthone-1,3-dicarboxylic acid; Ac	C17H10O8
📖	8-Hydroxyxanthone-1,3-dicarboxylic acid; Di-Me ester	C17H12O7
📖	8-Hydroxyxanthone-1,6-dicarboxylic acid	C15H8O7
📖	8-Hydroxyxanthone-1,6-dicarboxylic acid; 1'-Me ester	C16H10O7
📖	8-Hydroxyxanthone-1,6-dicarboxylic acid; Me ether, di-Me ester	C18H14O7
📖	Hypericumxanthone B	C23H22O6
📖	Hyperidixanthone	C30H22O10
📖	Hyperxanthone	C18H14O5
📖	Hyperxanthone; 5-Deoxy	C18H14O4
📖	Hyperxanthone B	C18H16O8
📖	Hyperxanthone B; 1'-Deoxy	C18H16O7
📖	Hyperxanthone F	C16H12O7
📖	Inophinnin	C24H26O6
📖	Inophinone	C28H28O6
📖	Isocudraxanthone L	C23H24O6
📖	Isomangiferin	C19H18O11
📖	Isomangiferin; 8-Hydroxy, 7-O-(4-hydroxybenzoyl)	C26H22O14
📖	Isomangiferin; 3-Me ether	C20H20O11
📖	Isomangiferin; 7-Me ether	C20H20O11
📖	Isomangiferin; 7-Me ether, 6'-β-D-apiofuranosyl	C25H28O15
📖	Isomangiferin; 7-Me ether, 2',6'-bis-O-β-D-apiofuranosyl	C30H36O19
📖	1-Isomangostin	C24H26O6
📖	1-Isomangostin; 2',3'-Dihydro, 3'-hydroxy	C24H28O7
📖	1-Isomangostin; 2',3'-Dihydro, 3'-hydroxy, 6-Me ether	C25H30O7
📖	1-Isomangostin; 2',3'-Dihydro, 3'-methoxy, 6-Me ether	C26H32O7
📖	1-Isomangostin; 2''ξ-Hydroxy	C24H26O7
📖	1-Isomangostin; 2''ξ-Hydroxy, 6-Me ether	C25H28O7
📖	1-Isomangostin; Δ3'-Isomer, 2''ξ-hydroxy, 2'-oxo, 6-Me ether	C25H26O8
📖	Isonormangostin	C23H24O6
📖	Isonormangostin; Di-Me ether	C25H28O6
📖	Isonormangostin; 2'R-Hydroxy, 1'',2''-didehydro	C23H22O7
📖	Isonormangostin; 3-Me ether	C24H26O6
📖	2''-Isopropenyl-3''-hydroxydihydrofuranodemethylcalabaxanthone	C23H20O6
📖	Isorheediaxanthone B	C23H24O6
📖	Isoswertiabisxanthone I	C26H14O12
📖	Isoswertiabisxanthone I; 8'-O-β-D-Glucopyranoside	C32H24O17
📖	Isoswertiabisxanthone I; 6-Me ether	C27H16O12
📖	Isoswertiabisxanthone I; 6-Me ether, 8'-O-β-D-glucopyranoside	C33H26O17
📖	Jacarelhyperol D	C31H22O13
📖	Jacareubin	C18H14O6
📖	Jacareubin; 9-Deoxy	C18H14O5
📖	Jacareubin; 5-Me ether	C19H16O6
📖	Jacareubin; 10-Me ether	C19H16O6
📖	Jacareubin; 12-Methoxy, 9-deoxy	C19H16O6
📖	Jacareubin; 12-Methoxy, tri-Me ether	C22H22O7
📖	Jacareubin; Tri-Me ether	C21H20O6
📖	Kaurabassin A	C31H24O10
📖	Kaurabassin A; (-)-form	C31H24O10
📖	Kaurabassin A; (-)-form, 5-Methoxy	C32H26O11
📖	Kayeaxanthone	C25H26O6
📖	Kielcorin B	C24H20O8
📖	Latisxanthone A	C28H28O6
📖	Latisxanthone A; Δ3'-Isomer, 2'ξ-hydroperoxy	C28H28O8
📖	Latisxanthone C	C28H30O6
📖	Latisxanthone D	C23H22O6
📖	Laurentixanthone A	C23H22O4
📖	Laurentixanthone C	C28H30O6
📖	Laurentixanthone C; 2,4-Dideoxy	C28H30O4
📖	Leprocybin	C24H20O13
📖	Leprocybin; Aglycone	C18H10O8
📖	Lysolipin I	C29H24ClNO11
📖	Macluraxanthone	C23H22O6
📖	Macluraxanthone; 9-Deoxy	C23H22O5
📖	Macluraxanthone; 9-Deoxy, 10-Ac	C25H24O6
📖	Macluraxanthone; 7-Hydroxy, 10-Me ether	C24H24O7
📖	Macluraxanthone; 10-Me ether	C24H24O6
📖	Macluraxanthone; Tri-Me ether	C26H28O6
📖	Macluraxanthone B	C23H24O6
📖	Macluraxanthone B; 7-Deoxy, 5-hydroxy	C23H24O6
📖	Macluraxanthone B; 3-Me ether	C24H26O6
📖	Maculatoxanthone	C28H30O6
📖	Mangicrocin	C45H50O19
📖	Mangiferin	C19H18O11
📖	Mangiferin; 6'-Ac	C21H20O12
📖	Mangiferin; 2'-Benzoyl	C26H22O12
📖	Mangiferin; 3'-Benzoyl	C26H22O12
📖	Mangiferin; 4'-Benzoyl	C26H22O12
📖	Mangiferin; 6'-Benzoyl	C26H22O12
📖	Mangiferin; 2'-O-E-Cinnamoyl	C28H24O12
📖	Mangiferin; 3'-O-E-Cinnamoyl	C28H24O12
📖	Mangiferin; 4'-O-E-Cinnamoyl	C28H24O12
📖	Mangiferin; 6'-O-E-Cinnamoyl	C28H24O12
📖	Mangiferin; 2'-O-(3,4-Dihydroxy-E-cinnamoyl)	C28H24O14
📖	Mangiferin; 3'-O-(3,4-Dihydroxy-E-cinnamoyl)	C28H24O14
📖	Mangiferin; 3,6-Di-Me ether, 2',3',4',6'-tetra-Ac	C29H30O15
📖	Mangiferin; 6-O-β-D-Glucopyranoside	C25H28O16
📖	Mangiferin; 7-O-β-D-Glucopyranoside	C25H28O16
📖	Mangiferin; 2'-O-(4-Hydroxybenzoyl)	C26H22O13
📖	Mangiferin; 3'-O-(4-Hydroxybenzoyl)	C26H22O13
📖	Mangiferin; 2'-O-(4-Hydroxy-E-cinnamoyl)	C28H24O13
📖	Mangiferin; 3'-O-(4-Hydroxy-E-cinnamoyl)	C28H24O13
📖	Mangiferin; 6'-O-(4-Hydroxy-E-cinnamoyl)	C28H24O13
📖	Mangiferin; 3-Me ether	C20H20O11
📖	Mangiferin; 7-Me ether	C20H20O11
📖	Mangiferin; 7-Me ether, 2'-O-β-D-apiofuranosyl	C25H28O15
📖	Mangiferin; 7-Me ether, 6'-O-β-D-apiofuranosyl	C25H28O15
📖	Mangiferin; 7-Me ether, 6'-O-β-D-arabinopyranosyl	C25H28O15
📖	Mangiferin; 2',3',4',6'-Tetra-Ac	C27H26O15
📖	Mangiferin; 1,3,6,7-Tetra-Me ether, 2',3',4',6'-tetra-Ac	C31H34O15
📖	Mangiferin; 6'-O-(3,4,5-Trihydroxybenzoyl)	C26H22O15
📖	Mangiferin; 1,3,6-Tri-Me ether, 2',3',4',6'-tetra-Ac	C30H32O15
📖	Mangiferoxanthone A	C38H34O22
📖	Mangostanin	C24H26O7
📖	Mangostanin; 6-Deoxy, O7-de-Me	C23H24O6
📖	Mangostanin; 1',2'-Didehydro, 3'-Me ether	C25H26O7
📖	Mangostanin; 1'-Hydroxy	C24H26O8
📖	Mangostanin; 6-Me ether	C25H28O7
📖	Mangostenone A	C28H28O6
📖	Mangostinone B	C24H26O6
📖	Mazatlanone	C29H22O8
📖	Mazatlanone; 1-Me ether	C30H24O8
📖	Mazatlanone; 7-Methoxy, 1-Me ether	C31H26O9
📖	Mesuabixanthone A	C33H24O12
📖	Mesuabixanthone A; 5-Me ether	C34H26O12
📖	Mesuaferrin A	C23H22O6
📖	Mesuaferrin B	C23H20O6
📖	Mesuaferrin B; Dideoxy, 8-hydroxy	C23H20O5
📖	Mesuaferrin C	C24H26O6
📖	Mesuarianone	C28H28O6
📖	Mesuasinone	C28H30O5
📖	Mesuferrol A	C32H22O12
📖	Mesuferrol A; 5-Me ether	C33H24O12
📖	1-Methylxanthone	C14H10O2
📖	2-Methylxanthone	C14H10O2
📖	3-Methylxanthone	C14H10O2
📖	Monogxanthone A	C33H40O6
📖	Monogxanthone B	C23H24O6
📖	Monogxanthone H	C33H38O6
📖	Monogxanthone H; (Z)-Isomer	C33H38O6
📖	Monogxanthone J	C33H38O6
📖	Morusignin G	C23H24O6
📖	Morusignin G; 8-Hydroxy	C23H24O7
📖	Morusignin G; 7-Hydroxy, 5-deoxy	C23H24O6
📖	Morusignin H	C23H24O6
📖	Morusignin H; 8-Hydroxy	C23H24O7
📖	Morusignin J	C23H22O6
📖	Morusignin J; 1-Deoxy	C23H22O5
📖	Morusignin J; 1-Deoxy, 11,12-dihydro	C23H24O5
📖	Muchimangin C	C32H30O11
📖	Muchimangin C; O5-De-Me, 6-Me ether	C32H30O11
📖	Muchimangin C; O5-De-Me, 8-methoxy, 6-Me ether	C33H32O12
📖	Muchimangin C; 5-Demethoxy, 8-hydroxy	C31H28O11
📖	Muchimangin C; 8-Hydroxy	C32H30O12
📖	Muchimangin C; 8-Hydroxy, 6-Me ether	C33H32O12
📖	Muchimangin C; 6-Me ether	C33H32O11
📖	Muchimangin C; 8-Methoxy, O7-de-Me, 6,7-methylene ether	C33H30O12
📖	Muchimangin D	C31H28O10
📖	Muchimangin D; 8-Methoxy, O7-de-Me, 6,7-methylene ether	C32H28O11
📖	Najamxanthone	C26H28O8
📖	Neriifolone B	C19H16O7
📖	Neriifolone C	C18H16O6
📖	Nervosaxanthone	C28H32O6
📖	Nigricanside	C19H18O11
📖	Nigrolineaxanthone V	C24H24O6
📖	Nigrolineaxanthone V; 2',3'-Dihydro, 3'-hydroxy	C24H26O7
📖	Nigrolineaxanthone H	C18H14O5
📖	Nigrolineaxanthone H; 10-Hydroxy	C18H14O6
📖	Nigrolineaxanthone S	C28H30O5
📖	Nujiangexanthone F	C25H28O9
📖	Oblongixanthone B	C29H34O6
📖	Oblongixanthone C	C29H34O6
📖	Oblongixanthone F	C33H40O6
📖	Oliganthaxanthone A	C26H28O5
📖	Oliganthaxanthone B	C23H22O7
📖	Oliverixanthone	C30H36O7
📖	Oliverixanthone; 6-O-De-Me	C29H34O7
📖	Oriciacridone A	C36H32N2O9
📖	Oriciacridone A; 11-Hydroxy	C36H32N2O10
📖	Osajaxanthone	C18H14O5
📖	Osajaxanthone; 12-Hydroxy	C18H14O6
📖	(9-Oxo-9H-xanthen-2,6-diyl)bis[2-propenoic acid]	C19H12O6
📖	(9-Oxo-9H-xanthen-2,6-diyl)bis[2-propenoic acid]; (E,E)-form	C19H12O6
📖	Paeciloxanthone	C20H20O4
📖	Pancixanthone B	C18H16O5
📖	Pancixanthone B; 8-Hydroxy	C18H16O6
📖	Parvixanthone I	C24H26O7
📖	Paucinervin I	C23H22O6
📖	Paxanthone B	C23H22O6
📖	Paxanthonin	C24H26O6
📖	Paxanthonin; 5-O-De-Me	C23H24O6
📖	Paxanthonin; 6-Deoxy, 5-O-de-Me	C23H24O5
📖	Pedunxanthone B	C23H24O6
📖	Penangianaxanthone	C20H16O6
📖	Pentadesmaxanthone	C28H30O6
📖	Pentadexanthone	C24H24O7
📖	5,6,8,10,11-Pentahydroxy-3,3-dimethyl-3H,7H-pyrano[2,3-c]xanthen-7-one	C18H14O8
📖	5,6,8,10,11-Pentahydroxy-3,3-dimethyl-3H,7H-pyrano[2,3-c]xanthen-7-one; 5,6,8,11-Tetra-Me ether	C22H22O8
📖	5,6,8,10,11-Pentahydroxy-3,3-dimethyl-3H,7H-pyrano[2,3-c]xanthen-7-one; 5,8,10,11-Tetra-Me ether	C22H22O8
📖	1,2,3,5,6-Pentahydroxy-4,7-diprenylxanthone	C23H24O7
📖	1,2,3,5,6-Pentahydroxy-4,7-diprenylxanthone; 3-Me ether	C24H26O7
📖	1,2,3,5,6-Pentahydroxy-4,8-diprenylxanthone	C23H24O7
📖	1,2,3,5,6-Pentahydroxy-4,8-diprenylxanthone; Δ3''-Isomer, 2''S-hydroxy, 3-Me ether	C24H26O8
📖	1,2,3,5,6-Pentahydroxy-4,8-diprenylxanthone; 3-Me ether	C24H26O7
📖	1,3,5,6,7-Pentahydroxy-2,4-diprenylxanthone	C23H24O7
📖	1,3,5,6,7-Pentahydroxy-2,4-diprenylxanthone; 6,7-Di-Me ether	C25H28O7
📖	1,3,5,6,7-Pentahydroxy-2,4-diprenylxanthone; 7-Me ether	C24H26O7
📖	1,2,3,4,6-Pentahydroxy-8-methylxanthone	C14H10O7
📖	1,2,3,4,6-Pentahydroxy-8-methylxanthone; 2,4-Di-Me ether	C16H14O7
📖	1,2,3,4,6-Pentahydroxy-8-methylxanthone; 2,3,4-Tri-Me ether	C17H16O7
📖	1,2,3,5,6-Pentahydroxy-8-methylxanthone	C14H10O7
📖	1,2,3,5,6-Pentahydroxy-8-methylxanthone; 2,5-Di-Me ether	C16H14O7
📖	1,2,3,5,6-Pentahydroxy-8-methylxanthone; 2,3,5-Tri-Me ether	C17H16O7
📖	2,3,4,6,8-Pentahydroxy-1-methylxanthone	C14H10O7
📖	1,2,3,5,6-Pentahydroxy-4,7,8-triprenylxanthone	C28H32O7
📖	1,2,3,5,6-Pentahydroxy-4,7,8-triprenylxanthone; 2,3-Di-Me ether	C30H36O7
📖	1,2,3,5,6-Pentahydroxy-4,7,8-triprenylxanthone; 3-Me ether	C29H34O7
📖	1,2,3,4,5-Pentahydroxyxanthone	C13H8O7
📖	1,2,3,4,5-Pentahydroxyxanthone; Penta-Me ether	C18H18O7
📖	1,2,3,4,5-Pentahydroxyxanthone; 2,3,4,5-Tetra-Me ether	C17H16O7
📖	1,2,3,4,5-Pentahydroxyxanthone; 2,3,4,5-Tetra-Me ether, 1-O-[β-D-glucopyranosyl-(1→6)-β-D-glucopyranoside]	C29H36O17
📖	1,2,3,4,5-Pentahydroxyxanthone; 2,3,4,5-Tetra-Me ether, 1-O-[β-D-xylopyranosyl-(1→6)-β-D-glucopyranoside]	C28H34O16
📖	1,2,3,4,5-Pentahydroxyxanthone; 2,3,4-Tri-Me ether	C16H14O7
📖	1,2,3,4,5-Pentahydroxyxanthone; 3,4,5-Tri-Me ether	C16H14O7
📖	1,2,3,4,6-Pentahydroxyxanthone	C13H8O7
📖	1,2,3,4,6-Pentahydroxyxanthone; 2,3,4,6-Tetra-Me ether	C17H16O7
📖	1,2,3,4,7-Pentahydroxyxanthone	C13H8O7
📖	1,2,3,4,7-Pentahydroxyxanthone; Penta-Me ether	C18H18O7
📖	1,2,3,4,7-Pentahydroxyxanthone; 1,2,3,4-Tetra-Me ether	C17H16O7
📖	1,2,3,4,7-Pentahydroxyxanthone; 1,3,4,7-Tetra-Me ether	C17H16O7
📖	1,2,3,4,7-Pentahydroxyxanthone; 2,3,4,7-Tetra-Me ether	C17H16O7
📖	1,2,3,4,7-Pentahydroxyxanthone; 2,3,4,7-Tetra-Me ether, 1-O-[β-D-xylopyranosyl-(1→6)-β-D-glucopyranoside]	C28H34O16
📖	1,2,3,4,7-Pentahydroxyxanthone; 2,3,4-Tri-Me ether	C16H14O7
📖	1,2,3,4,7-Pentahydroxyxanthone; 2,3,7-Tri-Me ether	C16H14O7
📖	1,2,3,4,7-Pentahydroxyxanthone; 2,4,7-Tri-Me ether	C16H14O7
📖	1,2,3,4,7-Pentahydroxyxanthone; 2,3,4-Tri-Me-ether, 1-O-[β-D-xylopranosyl-(1→6)-β-D-glucopyranoside]	C27H32O16
📖	1,2,3,4,8-Pentahydroxyxanthone	C13H8O7
📖	1,2,3,4,8-Pentahydroxyxanthone; 2,4-Di-Me ether	C15H12O7
📖	1,2,3,4,8-Pentahydroxyxanthone; Penta-Me ether	C18H18O7
📖	1,2,3,4,8-Pentahydroxyxanthone; 1,2,3,4-Tetra-Me ether	C17H16O7
📖	1,2,3,4,8-Pentahydroxyxanthone; 1,2,4-Tri-Me ether	C16H14O7
📖	1,2,3,5,6-Pentahydroxyxanthone	C13H8O7
📖	1,2,3,5,6-Pentahydroxyxanthone; 2,5-Di-Me ether	C15H12O7
📖	1,2,3,5,6-Pentahydroxyxanthone; 1,2,5-Tri-Me ether	C16H14O7
📖	1,2,3,5,7-Pentahydroxyxanthone	C13H8O7
📖	1,2,3,5,7-Pentahydroxyxanthone; 2,3,5,7-Tetra-Me ether	C17H16O7
📖	1,2,3,5,7-Pentahydroxyxanthone; 2,3,5,7-Tetra-Me ether, 1-O-[β-D-xylopyranosyl-(1→6)-β-D-glucopyranoside]	C28H34O16
📖	1,2,3,5,7-Pentahydroxyxanthone; 2,3,5-Tri-Me ether	C16H14O7
📖	1,2,3,5,7-Pentahydroxyxanthone; 2,3,7-Tri-Me ether	C16H14O7
📖	1,2,3,5,8-Pentahydroxyxanthone	C13H8O7
📖	1,2,3,5,8-Pentahydroxyxanthone; 2,5-Di-Me ether	C15H12O7
📖	1,2,3,5,8-Pentahydroxyxanthone; 1,2,3,5-Tetra-Me ether	C17H16O7
📖	1,2,3,5,8-Pentahydroxyxanthone; 1,2,5,8-Tetra-Me ether	C17H16O7
📖	1,2,3,5,8-Pentahydroxyxanthone; 1,2,5-Tri-Me ether	C16H14O7
📖	1,2,3,5,8-Pentahydroxyxanthone; 2,3,5-Tri-Me ether	C16H14O7
📖	1,2,3,5,8-Pentahydroxyxanthone; 2,3,8-Tri-Me ether	C16H14O7
📖	1,2,3,5,8-Pentahydroxyxanthone; 2,3,5-Tri-Me ether, 8-O-β-D-glucopyranoside	C22H24O12
📖	1,2,3,5,8-Pentahydroxyxanthone; 2,3,5-Tri-Me ether, 8-O-[β-D-xylopyranosyl-(1→6)-β-D-glucopyranoside]	C27H32O16
📖	1,2,3,6,7-Pentahydroxyxanthone	C13H8O7
📖	1,2,3,6,7-Pentahydroxyxanthone; 2,3:6,7-Bis(methylene), 1-Me ether	C16H10O7
📖	1,2,3,6,7-Pentahydroxyxanthone; 2,3-Di-Me ether	C15H12O7
📖	1,2,3,6,7-Pentahydroxyxanthone; 2,6-Di-Me ether	C15H12O7
📖	1,2,3,6,7-Pentahydroxyxanthone; 2,7-Di-Me ether	C15H12O7
📖	1,2,3,6,7-Pentahydroxyxanthone; 2,7-Di-Me ether, 3-O-β-D-glucopyranoside, 6-O-[α-L-rhamnopyranosyl-(1→3)-2-O-acetyl-α-L-rhamnopyranoside]	C35H44O21
📖	1,2,3,6,7-Pentahydroxyxanthone; 2,7-Di-Me ether, 6-O-α-L-rhamnopyranoside	C21H22O11
📖	1,2,3,6,7-Pentahydroxyxanthone; 2,7-Di-Me ether, 6-O-[α-L-rhamnopyranosyl-(1→3)-2-O-acetyl-α-L-rhamnopyranoside]	C29H34O16
📖	1,2,3,6,7-Pentahydroxyxanthone; 2,7-Di-Me ether, 3-O-[α-L-rhamnopyranosyl-(1→2)-β-D-glucopyranoside]	C27H32O16
📖	1,2,3,6,7-Pentahydroxyxanthone; 2,7-Di-Me ether, 6-O-[α-L-rhamnopyranosyl-(1→3)-α-L-rhamnopyranoside]	C27H32O15
📖	1,2,3,6,7-Pentahydroxyxanthone; 6,7-Methylene, 1,2,3-tri-Me ether	C17H14O7
📖	1,2,3,6,7-Pentahydroxyxanthone; Penta-Me ether	C18H18O7
📖	1,2,3,6,7-Pentahydroxyxanthone; 1,2,3,7-Tetra-Me ether	C17H16O7
📖	1,2,3,6,7-Pentahydroxyxanthone; 1,2,3,7-Tetra-Me ether, 6-O-β-D-glucopyranoside	C23H26O12
📖	1,2,3,6,7-Pentahydroxyxanthone; 1,2,3,7-Tetra-Me ether, 6-O-[α-L-rhamnopyranosyl-(1→2)-β-D-glucopyranoside]	C29H36O16
📖	1,2,3,6,7-Pentahydroxyxanthone; 1,2,7-Tri-Me ether	C16H14O7
📖	1,2,3,6,7-Pentahydroxyxanthone; 1,6,7-Tri-Me ether	C16H14O7
📖	1,2,3,6,8-Pentahydroxyxanthone	C13H8O7
📖	1,2,3,6,8-Pentahydroxyxanthone; 1,2-Di-Me ether	C15H12O7
📖	1,2,3,6,8-Pentahydroxyxanthone; 2,6-Di-Me ether	C15H12O7
📖	1,2,3,6,8-Pentahydroxyxanthone; 2-Me ether	C14H10O7
📖	1,2,3,6,8-Pentahydroxyxanthone; 2,3-Methylene ether	C14H8O7
📖	1,2,3,6,8-Pentahydroxyxanthone; Penta-Me ether	C18H18O7
📖	1,2,3,6,8-Pentahydroxyxanthone; 1,2,3-Tri-Me ether	C16H14O7
📖	1,2,3,6,8-Pentahydroxyxanthone; 1,2,6-Tri-Me ether	C16H14O7
📖	1,2,3,6,8-Pentahydroxyxanthone; 1,2,8-Tri-Me ether	C16H14O7
📖	1,2,3,6,8-Pentahydroxyxanthone; 2,3,6-Tri-Me ether	C16H14O7
📖	1,2,3,7,8-Pentahydroxyxanthone	C13H8O7
📖	1,2,3,7,8-Pentahydroxyxanthone; 2,3:7,8-Bis(methylene), 1-Me ether	C16H10O7
📖	1,2,3,7,8-Pentahydroxyxanthone; 1,2-Di-Me ether	C15H12O7
📖	1,2,3,7,8-Pentahydroxyxanthone; 2,8-Di-Me ether	C15H12O7
📖	1,2,3,7,8-Pentahydroxyxanthone; 7,8-Di-Me ether	C15H12O7
📖	1,2,3,7,8-Pentahydroxyxanthone; 2-Me ether	C14H10O7
📖	1,2,3,7,8-Pentahydroxyxanthone; 2,3-Methylene, 1,8-di-Me ether	C16H12O7
📖	1,2,3,7,8-Pentahydroxyxanthone; 2,3-Methylene, 8-Me ether	C15H10O7
📖	1,2,3,7,8-Pentahydroxyxanthone; 2,3-Methylene, 1,7,8-tri-Me ether	C17H14O7
📖	1,2,3,7,8-Pentahydroxyxanthone; Penta-Me ether	C18H18O7
📖	1,2,3,7,8-Pentahydroxyxanthone; 1,2,3,8-Tetra-Me ether	C17H16O7
📖	1,2,3,7,8-Pentahydroxyxanthone; 1,2,3-Tri-Me ether	C16H14O7
📖	1,2,3,7,8-Pentahydroxyxanthone; 1,2,8-Tri-Me ether	C16H14O7
📖	1,2,3,7,8-Pentahydroxyxanthone; 2,3,7-Tri-Me ether	C16H14O7
📖	1,2,3,7,8-Pentahydroxyxanthone; 2,3,8-Tri-Me ether	C16H14O7
📖	1,2,4,5,6-Pentahydroxyxanthone	C13H8O7
📖	1,2,4,5,6-Pentahydroxyxanthone; 2,5,6-Tri-Me ether	C16H14O7
📖	1,2,4,6,8-Pentahydroxyxanthone	C13H8O7
📖	1,2,4,6,8-Pentahydroxyxanthone; 2,4-Di-Me ether	C15H12O7
📖	1,2,4,6,8-Pentahydroxyxanthone; 1,2,4,6-Tetra-Me ether	C17H16O7
📖	1,2,4,6,8-Pentahydroxyxanthone; 1,2,4,6-Tetra-Me ether, 8-O-[β-D-xylopyranosyl-(1→6)-β-D-glucopyranoside]	C28H34O16
📖	1,2,4,6,8-Pentahydroxyxanthone; 1,2,4-Tri-Me ether	C16H14O7
📖	1,2,4,6,8-Pentahydroxyxanthone; 1,4,6-Tri-Me ether	C16H14O7
📖	1,2,4,6,8-Pentahydroxyxanthone; 2,4,6-Tri-Me ether	C16H14O7
📖	1,2,5,6,8-Pentahydroxyxanthone	C13H8O7
📖	1,2,5,6,8-Pentahydroxyxanthone; 1,5-Di-Me ether	C15H12O7
📖	1,2,5,6,8-Pentahydroxyxanthone; 2,5-Di-Me ether	C15H12O7
📖	1,2,5,6,8-Pentahydroxyxanthone; 2,6-Di-Me ether	C15H12O7
📖	1,2,5,6,8-Pentahydroxyxanthone; 5,6-Di-Me ether	C15H12O7
📖	1,2,5,6,8-Pentahydroxyxanthone; 1,6-Di-Me ether, 8-O-β-D-glucopyranoside	C21H22O12
📖	1,2,5,6,8-Pentahydroxyxanthone; 2,6-Di-Me ether, 5-O-β-D-glucopyranoside	C21H22O12
📖	1,2,5,6,8-Pentahydroxyxanthone; 5,6-Di-Me ether, 2-O-β-D-glucopyranoside	C21H22O12
📖	1,2,5,6,8-Pentahydroxyxanthone; 5,6-Di-Me ether, 1-O-[β-D-glucopyranosyl-(1→6)-β-D-glucopyranoside]	C27H32O17
📖	1,2,5,6,8-Pentahydroxyxanthone; 2,6-Di-Me ether, 5-O-[α-L-rhamnopyranosyl-(1→2)-β-D-glucopyranoside]	C27H32O16
📖	1,2,5,6,8-Pentahydroxyxanthone; 5,6-Di-Me ether, 2-O-[β-D-xylopyranosyl-(1→6)-β-D-glucopyranoside]	C26H30O16
📖	1,2,5,6,8-Pentahydroxyxanthone; Penta-Me ether	C18H18O7
📖	1,2,5,6,8-Pentahydroxyxanthone; 1,2,5,6-Tetra-Me ether	C17H16O7
📖	1,2,5,6,8-Pentahydroxyxanthone; 1,2,5,6-Tetra-Me ether, 8-O-β-D-glucopyranoside	C23H26O12
📖	1,2,5,6,8-Pentahydroxyxanthone; 1,2,5,6-Tetra-Me ether, 8-O-[β-D-xylopyranosyl-(1→6)-β-D-glucopyranoside]	C28H34O16
📖	1,2,5,6,8-Pentahydroxyxanthone; 1,2,5-Tri-Me ether	C16H14O7
📖	1,2,5,6,8-Pentahydroxyxanthone; 1,5,6-Tri-Me ether	C16H14O7
📖	1,2,5,6,8-Pentahydroxyxanthone; 2,5,6-Tri-Me ether	C16H14O7
📖	1,2,5,6,8-Pentahydroxyxanthone; 1,5,6-Tri-Me ether, 8-O-β-D-glucopyranoside	C22H24O12
📖	1,2,5,6,8-Pentahydroxyxanthone; 1,5,6-Tri-Me ether, 8-O-[β-D-xylopyranosyl-(1→6)-β-D-glucopyranoside]	C27H32O16
📖	1,3,4,5,6-Pentahydroxyxanthone	C13H8O7
📖	1,3,4,5,6-Pentahydroxyxanthone; Penta-Me ether	C18H18O7
📖	1,3,4,5,8-Pentahydroxyxanthone	C13H8O7
📖	1,3,4,5,8-Pentahydroxyxanthone; 3,4-Di-Me ether	C15H12O7
📖	1,3,4,5,8-Pentahydroxyxanthone; 4,5-Di-Me ether	C15H12O7
📖	1,3,4,5,8-Pentahydroxyxanthone; 4,5-Di-Me ether, 1-O-β-D-glucopyranoside	C21H22O12
📖	1,3,4,5,8-Pentahydroxyxanthone; 4,5-Di-Me ether, 3-O-β-D-glucopyranoside	C21H22O12
📖	1,3,4,5,8-Pentahydroxyxanthone; 4,5-Di-Me ether, 1-O-[β-D-glucopyranosyl-(1→4)-β-D-glucopyranoside]	C27H32O17
📖	1,3,4,5,8-Pentahydroxyxanthone; 4,5-Di-Me ether, 1-O-[β-D-glucopyranosyl-(1→6)-β-D-glucopyranoside]	C27H32O17
📖	1,3,4,5,8-Pentahydroxyxanthone; 4,5-Di-Me ether, 1-O-[β-D-xylopyranosyl-(1→6)-β-D-glucopyranoside]	C26H30O16
📖	1,3,4,5,8-Pentahydroxyxanthone; 4,5-Di-Me ether, 3-O-[β-D-xylopyranosyl-(1→6)-β-D-glucopyranoside]	C26H30O16
📖	1,3,4,5,8-Pentahydroxyxanthone; 3-Me ether	C14H10O7
📖	1,3,4,5,8-Pentahydroxyxanthone; Penta-Me ether	C18H18O7
📖	1,3,4,5,8-Pentahydroxyxanthone; 1,3,4,5-Tetra-Me ether	C17H16O7
📖	1,3,4,5,8-Pentahydroxyxanthone; 3,4,5,8-Tetra-Me ether, 1-O-(2,3,4,6-tetra-O-methyl-β-D-glucopyranoside)	C27H34O12
📖	1,3,4,5,8-Pentahydroxyxanthone; 3,4,5-Tri-Me ether	C16H14O7
📖	1,3,4,5,8-Pentahydroxyxanthone; 4,5,8-Tri-Me ether	C16H14O7
📖	1,3,4,5,8-Pentahydroxyxanthone; 3,4,5-Tri-Me ether, 1-O-[β-D-xylopyranosyl-(1→6)-β-D-glucopyranoside]	C27H32O16
📖	1,3,4,5,8-Pentahydroxyxanthone; 3,4,5-Tri-Me ether, 8-O-[β-D-xylopyranosyl-(1→6)-β-D-glucopyranoside]	C27H32O16
📖	1,3,4,6,7-Pentahydroxyxanthone	C13H8O7
📖	1,3,4,6,7-Pentahydroxyxanthone; 4,6-Di-Me ether	C15H12O7
📖	1,3,4,6,7-Pentahydroxyxanthone; 6,7-Methylene, 1,3,4-tri-Me ether	C17H14O7
📖	1,3,4,6,8-Pentahydroxyxanthone	C13H8O7
📖	1,3,4,6,8-Pentahydroxyxanthone; 4,6-Di-Me ether	C15H12O7
📖	1,3,4,6,8-Pentahydroxyxanthone; 3,4,6-Tri-Me ether	C16H14O7
📖	1,3,4,6,8-Pentahydroxyxanthone; 4,6,8-Tri-Me ether	C16H14O7
📖	1,3,5,6,7-Pentahydroxyxanthone	C13H8O7
📖	1,3,5,6,7-Pentahydroxyxanthone; 3,5-Di-Me ether	C15H12O7
📖	1,3,5,6,7-Pentahydroxyxanthone; 3,6-Di-Me ether	C15H12O7
📖	1,3,5,6,7-Pentahydroxyxanthone; 3,7-Di-Me ether	C15H12O7
📖	1,3,5,6,7-Pentahydroxyxanthone; 5,7-Di-Me ether	C15H12O7
📖	1,3,5,6,7-Pentahydroxyxanthone; 6,7-Di-Me ether	C15H12O7
📖	1,3,5,6,7-Pentahydroxyxanthone; 3,5-Di-Me ether, 7-O-β-D-glucopyranoside	C21H22O12
📖	1,3,5,6,7-Pentahydroxyxanthone; 3,7-Di-Me ether, 5-O-β-D-glucopyranoside	C21H22O12
📖	1,3,5,6,7-Pentahydroxyxanthone; 7-Me ether	C14H10O7
📖	1,3,5,6,7-Pentahydroxyxanthone; 3-Me ether, 7-O-β-D-glucopyranoside	C20H20O12
📖	1,3,5,6,7-Pentahydroxyxanthone; Penta-Me ether	C18H18O7
📖	1,3,5,6,7-Pentahydroxyxanthone; 1,3,5,7-Tetra-Me ether	C17H16O7
📖	1,3,5,6,7-Pentahydroxyxanthone; 3,5,6,7-Tetra-Me ether	C17H16O7
📖	1,3,5,6,7-Pentahydroxyxanthone; 1,5,7-Tri-Me ether	C16H14O7
📖	1,3,5,6,7-Pentahydroxyxanthone; 3,5,6-Tri-Me ether	C16H14O7
📖	1,3,5,6,7-Pentahydroxyxanthone; 3,5,7-Tri-Me ether	C16H14O7
📖	1,3,5,6,7-Pentahydroxyxanthone; 3,6,7-Tri-Me ether	C16H14O7
📖	1,3,5,6,7-Pentahydroxyxanthone; 5,6,7-Tri-Me ether	C16H14O7
📖	1,4,5,6,7-Pentahydroxyxanthone	C13H8O7
📖	1,4,5,6,7-Pentahydroxyxanthone; 4,5,6,7-Tetra-Me ether	C17H16O7
📖	2,3,4,5,7-Pentahydroxyxanthone	C13H8O7
📖	2,3,4,5,7-Pentahydroxyxanthone; 3,4,7-Tri-Me ether	C16H14O7
📖	Pestalofone E	C33H36O12
📖	Pestalofone E; 10-Epimer	C33H36O12
📖	Ploiarixanthone	C26H14O8
📖	Porxanthone A	C21H20O6
📖	Prebikaverin	C18H12O6
📖	Prenxanthone	C20H20O5
📖	Prenxanthone; 4'-Deoxy	C20H20O4
📖	Prenxanthone; 4'-Deoxy, 2',3'-dihydro, 2'ξ,3'-dihydroxy	C20H22O6
📖	7-Prenyljacareubin	C23H22O6
📖	7-Prenyljacareubin; 5-Me ether	C24H24O6
📖	8-Prenyltoxyloxanthone C	C23H24O6
📖	Pruniflorone G	C28H30O6
📖	Pruniflorone G; 9-Deoxy	C28H30O5
📖	Pruniflorone G; 9-Me ether	C29H32O6
📖	Pruniflorone G; 10-Me ether	C29H32O6
📖	Pruniflorone K	C28H30O5
📖	Pruniflorone M	C18H16O6
📖	Pruniflorone M; (R)-form	C18H16O6
📖	Pruniflorone M; (ξ)-form	C18H16O6
📖	Pruniflorone M; (ξ)-form, 9-Hydroxy	C18H16O7
📖	Pruniflorone M; (ξ)-form, 9-Hydroxy, 10-Me ether	C19H18O7
📖	Pruniflorone N	C18H16O6
📖	Pruniflorone N; 10-Hydroxy	C18H16O7
📖	Pruniflorone N; 10-Hydroxy, 11-Me ether	C19H18O7
📖	Psorofebrin	C19H16O7
📖	Psorofebrin; 5'-Hydroxy, O-de-Me, 11-Me ether	C19H16O8
📖	Psorospermin	C19H16O6
📖	Psorospermin; 5'-Hydroxy	C19H16O7
📖	Psorospermindiol	C19H18O7
📖	Psorospermindiol; 4'-O-Ac	C21H20O8
📖	Psorospermindiol; 5'-Chloro, O5-Me	C20H19ClO7
📖	Psorospermindiol; O-De-Me	C18H16O7
📖	Psorospermindiol; O-De-Me, epimer	C18H16O7
📖	Psorospermindiol; O4'-Et	C21H22O7
📖	Psorospermindiol; 5'-Hydroxy	C19H18O8
📖	Psorospermindiol; O4'-Me	C20H20O7
📖	Psorospermindiol; O5-Me	C20H20O7
📖	Psoroxanthin	C18H14O6
📖	Psoroxanthin chlorohydrin	C18H15ClO6
📖	Pulmonarxanthone A	C22H20O6
📖	Pulmonarxanthone B	C20H18O6
📖	Puniceaside C	C45H34O23
📖	Puniceaside D	C45H30O23
📖	Puniceaside D; 7''-Me ether	C46H32O23
📖	Pyranojacareubin	C23H20O6
📖	Pyranojacareubin; 3',4'-Dihydro	C23H22O6
📖	Rheediaxanthone A	C23H20O6
📖	Rheediaxanthone A; Bis(deoxy), 5,8-dihydroxy	C23H20O6
📖	Rheediaxanthone B	C23H24O6
📖	Rheediaxanthone B; 5,6-Di-O-Ac	C27H28O8
📖	Rheediaxanthone C	C23H24O6
📖	Roeperanone	C28H32O6
📖	Roeperanone; (+)-(E)-form	C28H32O6
📖	Ruguloxanthone A	C25H26O6
📖	Sapxanthone	C30H38O9
📖	Scortechinone V	C34H38O10
📖	Scortechinone U	C26H30O6
📖	Scortechinone W	C34H38O10
📖	Scriblitifolic acid	C19H18O6
📖	Scriblitifolic acid; (±)-form	C19H18O6
📖	Scriblitifolic acid; (±)-form, 8-Deoxy	C19H18O5
📖	Scriblitifolic acid; (±)-form, Me ester	C20H20O6
📖	Scriblitifolic acid; (±)-form, Me ether	C20H20O6
📖	Secosterigmatocystin	C18H18O8
📖	Secosterigmatocystin; 1-O-De-Me, 3,8-di-Me ether	C19H20O8
📖	Secosterigmatocystin; 1-O-De-Me, 8-Me ether	C18H18O8
📖	Secosterigmatocystin; 3-Deoxy, 5,6-dihydroxy	C18H18O9
📖	Secosterigmatocystin; 3-Me ether	C19H20O8
📖	Secosterigmatocystin; 6-Methoxy, 3-deoxy, 5-hydroxy, 1-O-de-Me	C18H18O9
📖	Shahenxanthone	C25H28O7
📖	Shamixanthone	C25H26O5
📖	Shamixanthone; 2',3'-Dihydro, 2'-oxo	C25H26O6
📖	Shamixanthone; 2-Epimer	C25H26O5
📖	Shamixanthone; Δ3'-Isomer, 2'R-hydroxy	C25H26O6
📖	Shamixanthone; Δ3'-Isomer, 2'S-hydroxy	C25H26O6
📖	Soulattrin	C23H22O6
📖	Sterigmatin	C17H10O6
📖	Sterigmatin; Di-Me ether
📖	Sterigmatocystin	C18H12O6
📖	Sterigmatocystin; 9-Chloro	C18H11ClO6
📖	Sterigmatocystin; 9-Chloro, 1,2-dihydro, 2R-acetoxy, 8-Me ether	C21H17ClO8
📖	Sterigmatocystin; 9-Chloro, 1,2-dihydro, 2S-acetoxy, 8-Me ether	C21H17ClO8
📖	Sterigmatocystin; 9-Chloro, 8-Me ether	C19H13ClO6
📖	Sterigmatocystin; O-De-Me	C17H10O6
📖	Sterigmatocystin; O-De-Me, 8-Me ether	C18H12O6
📖	Sterigmatocystin; O-De-Me, 6-O-(4-O-methyl-β-L-arabinopyranoside)	C23H20O10
📖	Sterigmatocystin; 8-Deoxy	C18H12O5
📖	Sterigmatocystin; 1,2-Dihydro	C18H14O6
📖	Sterigmatocystin; 1,2-Dihydro, 2R-acetoxy, 8-Me ether	C21H18O8
📖	Sterigmatocystin; 1,2-Dihydro, 2S-acetoxy, 8-Me ether	C21H18O8
📖	Sterigmatocystin; 1,2-Dihydro, O-de-Me	C17H12O6
📖	Sterigmatocystin; 1,2-Dihydro, O-de-Me, 8-Me ether	C18H14O6
📖	Sterigmatocystin; 1,2-Dihydro, 2R,11-dimethoxy	C20H18O8
📖	Sterigmatocystin; 1,2-Dihydro, 2S,11-dimethoxy	C20H18O8
📖	Sterigmatocystin; 1,2-Dihydro, 10,11-dimethoxy	C20H18O8
📖	Sterigmatocystin; 1,2-Dihydro, 2-hydroxy, 8-Me ether	C19H16O7
📖	Sterigmatocystin; 1,2-Dihydro, 8-Me ether	C19H16O6
📖	Sterigmatocystin; 1,2-Dihydro, 2R-methoxy	C19H16O7
📖	Sterigmatocystin; 1,2-Dihydro, 11-methoxy, 2R-acetoxy	C21H18O9
📖	Sterigmatocystin; 10,11-Dimethoxy	C20H16O8
📖	Sterigmatocystin; 11-Hydroxy	C18H12O7
📖	Sterigmatocystin; 12cξ-Hydroxy, 8-Me ether	C19H14O7
📖	Sterigmatocystin; 8-Me ether	C19H14O6
📖	Sterigmatocystin; 11-Methoxy	C19H14O7
📖	Subelliptenone I	C23H24O6
📖	Subelliptenone A	C28H32O6
📖	Subelliptenone B	C23H24O6
📖	Subelliptenone C	C20H16O6
📖	Subelliptenone D	C20H16O6
📖	Subelliptenone E	C28H34O7
📖	Subelliptenone H	C23H22O6
📖	Subelliptenone H; 8-Deoxy, 9-hydroxy	C23H22O6
📖	Subelliptenone H; 8-Deoxy, 9-methoxy	C24H24O6
📖	Swerpunilactone B	C23H18O10
📖	Swerpunilactone B; (-)-form	C23H18O10
📖	Swerpunilactone B; (±)-form	C23H18O10
📖	Swerpunilactone B; (±)-form, 6-Me ether	C24H20O10
📖	Swertiabisxanthone I	C26H14O12
📖	Swertiabisxanthone I; 8-O-β-D-Glucopyranoside	C32H24O17
📖	Swertiabisxanthone I; 6'-Me ether	C27H16O12
📖	Swertiabisxanthone I; 6'-Me ether, 8-O-β-D-glucopyranoside	C33H26O17
📖	Swertiatrixanthone	C39H20O18
📖	Swertiatrixanthone; 6'-Me ether	C40H22O18
📖	Swertifrancheside	C35H28O17
📖	Swertipunicoside	C33H26O17
📖	Swertipunicoside; 3-O-De-Me	C32H24O17
📖	Symphonin	C25H26O7
📖	Symphonin; O6-De-Me	C24H24O7
📖	Tajixanthone	C25H26O6
📖	Tajixanthone; 15,16-Deepoxy, 15S-hydroxy, 16-ethoxy	C27H32O7
📖	Tajixanthone; 14R-Hydroxy, 25-Ac	C27H28O8
📖	Tajixanthone; Me ether
📖	Tajixanthone; 14R-Methoxy	C26H28O7
📖	Tajixanthone; 14S-Methoxy	C26H28O7
📖	Tajixanthone; 14R-Methoxy, 25-Ac	C28H30O8
📖	Tajixanthone hydrate	C25H28O7
📖	Tajixanthone hydrate; 2'-Ac	C27H30O8
📖	Tajixanthone hydrate; 2'-Deoxy, 2'S-chloro	C25H27ClO6
📖	Tajixanthone hydrate; 3'-Deoxy, 3'-chloro	C25H27ClO6
📖	Tajixanthone hydrate; 2',3'-Di-Me ether	C27H32O7
📖	Tajixanthone hydrate; 2'-O-Formyl	C26H28O8
📖	Tajixanthone hydrate; 3'-Me ether	C26H30O7
📖	2,4,5,7-Tetrachloro-1,3,6-trihydroxy-8-methylxanthone	C14H6Cl4O5
📖	2,4,5,7-Tetrachloro-1,3,6-trihydroxy-8-methylxanthone; 3-Me ether	C15H8Cl4O5
📖	2,4,5,7-Tetrachloro-1,3,6-trihydroxy-8-methylxanthone; 6-Me ether	C15H8Cl4O5
📖	2,4,5,7-Tetrachloro-1,3,6-trihydroxy-8-methylxanthone; Tri-Me ether	C17H12Cl4O5
📖	5,6,7,8-Tetrahydro-1,1',3,4',5,6',8,8'-octahydroxy-2,2'-bixanthone	C26H18O12
📖	5,6,7,8-Tetrahydro-1,1',3,4',5,6',8,8'-octahydroxy-2,2'-bixanthone; (5R*,8S*)-form	C26H18O12
📖	5,6,7,8-Tetrahydro-1,1',3,4',5,6',8,8'-octahydroxy-2,2'-bixanthone; (5R*,8S*)-form, 8-O-β-D-Glucopyranoside	C32H28O17
📖	5,6,7,8-Tetrahydro-1,1',3,4',5,6',8,8'-octahydroxy-2,2'-bixanthone; (5R*,8S*)-form, (4→2')-Isomer, 8-O-β-D-glucopyranoside	C32H28O17
📖	5,6,7,8-Tetrahydro-1,1',3,4',5,6',8,8'-octahydroxy-2,2'-bixanthone; (5R*,8S*)-form, 6'-Me ether, 8-O-β-D-glucopyranoside	C33H30O17
📖	1,3,4,6-Tetrahydroxy-2,5-diprenylxanthone	C23H24O6
📖	1,3,5,6-Tetrahydroxy-2,4-diprenylxanthone	C23H24O6
📖	1,3,5,6-Tetrahydroxy-2,4-diprenylxanthone; 3,5-Di-Me ether	C25H28O6
📖	1,3,5,6-Tetrahydroxy-2,4-diprenylxanthone; 3-Me ether	C24H26O6
📖	1,3,5,6-Tetrahydroxy-2,7-diprenylxanthone	C23H24O6
📖	1,3,5,6-Tetrahydroxy-2,7-diprenylxanthone; 3,6-Di-Me ether	C25H28O6
📖	1,3,5,6-Tetrahydroxy-2,7-diprenylxanthone; Δ3'-Isomer, 2'-hydroxy, 5-Me ether	C24H26O7
📖	1,3,5,6-Tetrahydroxy-2,7-diprenylxanthone; 5-Me ether	C24H26O6
📖	1,3,5,6-Tetrahydroxy-2,8-diprenylxanthone	C23H24O6
📖	1,3,5,6-Tetrahydroxy-4,7-diprenylxanthone	C23H24O6
📖	1,3,5,6-Tetrahydroxy-4,7-diprenylxanthone; 3-Me ether	C24H26O6
📖	1,3,5,6-Tetrahydroxy-4,8-diprenylxanthone	C23H24O6
📖	1,3,5,6-Tetrahydroxy-4,8-diprenylxanthone; 3,6-Di-Me ether	C25H28O6
📖	1,3,5,6-Tetrahydroxy-4,8-diprenylxanthone; 3-Me ether	C24H26O6
📖	1,3,5,7-Tetrahydroxy-2,4-diprenylxanthone	C23H24O6
📖	1,3,5,7-Tetrahydroxy-2,8-diprenylxanthone	C23H24O6
📖	1,3,5,7-Tetrahydroxy-2,8-diprenylxanthone; 5,7-Di-Me ether	C25H28O6
📖	1,3,5,8-Tetrahydroxy-2,4-diprenylxanthone	C23H24O6
📖	1,3,5,8-Tetrahydroxy-2,4-diprenylxanthone; 3-Me ether	C24H26O6
📖	1,3,5,8-Tetrahydroxy-2,7-diprenylxanthone	C23H24O6
📖	1,3,5,8-Tetrahydroxy-2,7-diprenylxanthone; 3,8-Di-Me ether	C25H28O6
📖	1,3,6,7-Tetrahydroxy-2,4-diprenylxanthone	C23H24O6
📖	1,3,6,7-Tetrahydroxy-2,4-diprenylxanthone; 3-Me ether	C24H26O6
📖	1,3,6,7-Tetrahydroxy-2,4-diprenylxanthone; 7-Me ether	C24H26O6
📖	1,3,6,7-Tetrahydroxy-2,5-diprenylxanthone	C23H24O6
📖	1,3,6,7-Tetrahydroxy-2,5-diprenylxanthone; 7-Me ether	C24H26O6
📖	1,3,6,7-Tetrahydroxy-2,8-diprenylxanthone	C23H24O6
📖	1,3,6,7-Tetrahydroxy-2,8-diprenylxanthone; 2'',3''-Dihydro, 2''ξ,3''-dihydroxy, 3,7-di-Me ether	C25H30O8
📖	1,3,6,7-Tetrahydroxy-2,8-diprenylxanthone; 2',3'-Dihydro, 2'ξ,3'-dihydroxy, 7-Me ether	C24H28O8
📖	1,3,6,7-Tetrahydroxy-2,8-diprenylxanthone; 2'',3''-Dihydro, 2''ξ,3''-dihydroxy, 7-Me ether	C24H28O8
📖	1,3,6,7-Tetrahydroxy-2,8-diprenylxanthone; 2'',3''-Dihydro, 3'',4'-dihydroxy(2'Z-), 7-Me ether	C24H28O8
📖	1,3,6,7-Tetrahydroxy-2,8-diprenylxanthone; 2'',3''-Dihydro, 3''-hydroxy	C23H26O7
📖	1,3,6,7-Tetrahydroxy-2,8-diprenylxanthone; 2',3'-Dihydro, 3'-hydroxy	C23H26O7
📖	1,3,6,7-Tetrahydroxy-2,8-diprenylxanthone; 2'',3''-Dihydro, 3''-hydroxy, 3,7-di-Me ether	C25H30O7
📖	1,3,6,7-Tetrahydroxy-2,8-diprenylxanthone; 2',3'-Dihydro, 3'-hydroxy, 3,7-di-Me ether	C25H30O7
📖	1,3,6,7-Tetrahydroxy-2,8-diprenylxanthone; 2'',3''-Dihydro, 3''-hydroxy, 6,7-di-Me ether	C25H30O7
📖	1,3,6,7-Tetrahydroxy-2,8-diprenylxanthone; 2'',3''-Dihydro, 3''-hydroxy, 3-Me ether	C24H28O7
📖	1,3,6,7-Tetrahydroxy-2,8-diprenylxanthone; 2'',3''-Dihydro, 3''-hydroxy, 7-Me ether	C24H28O7
📖	1,3,6,7-Tetrahydroxy-2,8-diprenylxanthone; 2',3'-Dihydro, 3'-hydroxy, 7-Me ether	C24H28O7
📖	1,3,6,7-Tetrahydroxy-2,8-diprenylxanthone; 2'',3''-Dihydro, 3''-methoxy	C24H28O7
📖	1,3,6,7-Tetrahydroxy-2,8-diprenylxanthone; 2'',3''-Dihydro, 3''-methoxy, 3,7-di-Me ether	C26H32O7
📖	1,3,6,7-Tetrahydroxy-2,8-diprenylxanthone; 3,6-Di-Me ether	C25H28O6
📖	1,3,6,7-Tetrahydroxy-2,8-diprenylxanthone; 3,7-Di-Me ether	C25H28O6
📖	1,3,6,7-Tetrahydroxy-2,8-diprenylxanthone; 6,7-Di-Me ether	C25H28O6
📖	1,3,6,7-Tetrahydroxy-2,8-diprenylxanthone; 4'-Hydroxy(2'Z-), 3,7-di-Me ether	C25H28O7
📖	1,3,6,7-Tetrahydroxy-2,8-diprenylxanthone; 4'-Hydroxy, 7-Me ether	C24H26O7
📖	1,3,6,7-Tetrahydroxy-2,8-diprenylxanthone; Δ3'-Isomer, 2'ξ-hydroxy	C23H24O7
📖	1,3,6,7-Tetrahydroxy-2,8-diprenylxanthone; Δ1''-Isomer(E-), 3''-hydroxy, 3,7-di-Me ether	C25H28O7
📖	1,3,6,7-Tetrahydroxy-2,8-diprenylxanthone; Δ1'-Isomer(Z-), 3'-hydroxy, 3,7-di-Me ether	C25H28O7
📖	1,3,6,7-Tetrahydroxy-2,8-diprenylxanthone; Δ3'-Isomer, 2'ξ-hydroxy, 3,7-di-Me ether	C25H28O7
📖	1,3,6,7-Tetrahydroxy-2,8-diprenylxanthone; Δ3''-Isomer, 2''ξ-hydroxy, 3,7-di-Me ether	C25H28O7
📖	1,3,6,7-Tetrahydroxy-2,8-diprenylxanthone; Δ3'-Isomer, 2'ξ-hydroxy, 6,7-di-Me ether	C25H28O7
📖	1,3,6,7-Tetrahydroxy-2,8-diprenylxanthone; Δ1'-Isomer(Z-), 3'-hydroxy, 7-Me ether	C24H26O7
📖	1,3,6,7-Tetrahydroxy-2,8-diprenylxanthone; Δ3'-Isomer, 2'ξ-hydroxy, 7-Me ether	C24H26O7
📖	1,3,6,7-Tetrahydroxy-2,8-diprenylxanthone; Δ1''-Isomer(E-), 3''-hydroxy, 3,6,7-tri-Me ether	C26H30O7
📖	1,3,6,7-Tetrahydroxy-2,8-diprenylxanthone; Δ3''-Isomer, 2''ξ-hydroxy, 3,6,7-tri-Me ether	C26H30O7
📖	1,3,6,7-Tetrahydroxy-2,8-diprenylxanthone; Δ3'-Isomer, 2'ξ-hydroxy, 3,6,7-tri-Me ether	C26H30O7
📖	1,3,6,7-Tetrahydroxy-2,8-diprenylxanthone; Δ3''-Isomer, 2''-oxo, 3,7-di-Me ether	C25H26O7
📖	1,3,6,7-Tetrahydroxy-2,8-diprenylxanthone; Δ3''-Isomer, 2''-oxo, 7-Me ether	C24H24O7
📖	1,3,6,7-Tetrahydroxy-2,8-diprenylxanthone; 3-Me ether	C24H26O6
📖	1,3,6,7-Tetrahydroxy-2,8-diprenylxanthone; 7-Me ether	C24H26O6
📖	1,3,6,7-Tetrahydroxy-2,8-diprenylxanthone; 3,6,7-Tri-Me ether	C26H30O6
📖	1,3,6,7-Tetrahydroxy-4,5-diprenylxanthone	C23H24O6
📖	1,3,6,7-Tetrahydroxy-4,5-diprenylxanthone; 6-Me ether	C24H26O6
📖	1,4,5,7-Tetrahydroxy-2,8-diprenylxanthone	C23H24O6
📖	1,4,5,7-Tetrahydroxy-2,8-diprenylxanthone; 4-Me ether	C24H26O6
📖	1,4,5,7-Tetrahydroxy-2,8-diprenylxanthone; 4-Me ether, 7-O-[β-D-glucopyranosyl-(1→4)-β-D-glucopyranoside]	C36H46O16
📖	1,4,5,7-Tetrahydroxy-2,8-diprenylxanthone; 4-Me ether, 7-O-[β-D-glucopyranosyl-(1→4)-[9Z-hexadecenoyl-(→6)]-β-D-glucopyranoside]	C52H74O17
📖	1,4,5,7-Tetrahydroxy-2,8-diprenylxanthone; 4-Me ether, 7-O-[β-D-glucopyranosyl-(1→4)-[9Z,12Z-octadecadienoyl-(→6)]-β-D-glucopyranoside]	C54H76O17
📖	1,4,5,7-Tetrahydroxy-2,8-diprenylxanthone; 4-Me ether, 7-O-[β-D-glucopyranosyl-(1→4)-6-O-octadecanoyl-β-D-glucopyranoside]	C54H80O17
📖	1,4,5,7-Tetrahydroxy-2,8-diprenylxanthone; 4-Me ether, 7-O-[β-D-glucopyranosyl-(1→4)-[9Z,12Z,15Z-octadecatrienoyl-(→6)]-β-D-glucopyranoside]	C54H74O17
📖	1,4,5,7-Tetrahydroxy-2,8-diprenylxanthone; 4-Me ether, 7-O-[β-D-glucopyranosyl-(1→4)-[9Z-octadecenoyl-(→6)]-β-D-glucopyranoside]	C54H78O17
📖	2,3,5,7-Tetrahydroxy-4,6-diprenylxanthone	C23H24O6
📖	2,3,6,8-Tetrahydroxy-1,5-diprenylxanthone	C23H24O6
📖	3,4,5,8-Tetrahydroxy-1,2-diprenylxanthone	C23H24O6
📖	3,4,6,8-Tetrahydroxy-1,2-diprenylxanthone	C23H24O6
📖	3,4,6,8-Tetrahydroxy-1,2-diprenylxanthone; 2',3'-Dihydro, 3'-hydroxy	C23H26O7
📖	1,2,3,6-Tetrahydroxy-8-methylxanthone	C14H10O6
📖	1,2,3,6-Tetrahydroxy-8-methylxanthone; 2,6-Di-Me ether	C16H14O6
📖	1,2,3,6-Tetrahydroxy-8-methylxanthone; 2-Me ether	C15H12O6
📖	1,2,5,8-Tetrahydroxy-3-methylxanthone	C14H10O6
📖	1,2,5,8-Tetrahydroxy-3-methylxanthone; 5-Me ether	C15H12O6
📖	1,3,4,6-Tetrahydroxy-8-methylxanthone	C14H10O6
📖	1,3,4,6-Tetrahydroxy-8-methylxanthone; 4-Me ether	C15H12O6
📖	1,3,4,8-Tetrahydroxy-6-methylxanthone	C14H10O6
📖	1,3,4,8-Tetrahydroxy-6-methylxanthone; 3-Me ether, 4-O-β-D-glucopyranoside	C21H22O11
📖	2,3,6,8-Tetrahydroxy-1-methylxanthone	C14H10O6
📖	3,4,6,8-Tetrahydroxy-1-methylxanthone	C14H10O6
📖	3,4,6,8-Tetrahydroxy-1-methylxanthone; 4,6-Di-Me ether	C16H14O6
📖	3,4,6,8-Tetrahydroxy-1-methylxanthone; 4-Me ether	C15H12O6
📖	3,4,6,8-Tetrahydroxy-1-methylxanthone; 6-Me ether	C15H12O6
📖	1,2,3,5-Tetrahydroxy-4-prenylxanthone	C18H16O6
📖	1,2,3,5-Tetrahydroxy-4-prenylxanthone; 2-Me ether	C19H18O6
📖	1,2,3,5-Tetrahydroxy-4-prenylxanthone; 3-Me ether	C19H18O6
📖	1,2,5,6-Tetrahydroxy-7-prenylxanthone	C18H16O6
📖	1,2,5,6-Tetrahydroxy-7-prenylxanthone; 5-Me ether	C19H18O6
📖	1,3,4,5-Tetrahydroxy-2-prenylxanthone	C18H16O6
📖	1,3,4,5-Tetrahydroxy-2-prenylxanthone; 4-Me ether	C19H18O6
📖	1,3,4,6-Tetrahydroxy-2-prenylxanthone	C18H16O6
📖	1,3,4,6-Tetrahydroxy-2-prenylxanthone; 3-Me ether	C19H18O6
📖	1,3,4,7-Tetrahydroxy-2-prenylxanthone	C18H16O6
📖	1,3,4,7-Tetrahydroxy-2-prenylxanthone; 4-Me ether	C19H18O6
📖	1,3,5,6-Tetrahydroxy-2-prenylxanthone	C18H16O6
📖	1,3,5,6-Tetrahydroxy-2-prenylxanthone; 2',3'-Dihydro, 3'-hydroxy	C18H18O7
📖	1,3,5,6-Tetrahydroxy-2-prenylxanthone; 3,5-Di-Me ether	C20H20O6
📖	1,3,5,6-Tetrahydroxy-2-prenylxanthone; 4'-Hydroxy(Z-), 5-Me ether	C19H18O7
📖	1,3,5,6-Tetrahydroxy-2-prenylxanthone; 3-Me ether	C19H18O6
📖	1,3,5,6-Tetrahydroxy-2-prenylxanthone; 5-Me ether	C19H18O6
📖	1,3,5,6-Tetrahydroxy-2-prenylxanthone; 6-Me ether	C19H18O6
📖	1,3,5,6-Tetrahydroxy-2-prenylxanthone; 3,5,6-Tri-Me ether	C21H22O6
📖	1,3,5,6-Tetrahydroxy-4-prenylxanthone	C18H16O6
📖	1,3,5,6-Tetrahydroxy-4-prenylxanthone; 2',3'-Dihydro, 3'-hydroxy, 3-Me ether	C19H20O7
📖	1,3,5,6-Tetrahydroxy-4-prenylxanthone; 3-Me ether	C19H18O6
📖	1,3,5,6-Tetrahydroxy-4-prenylxanthone; 5-Me ether	C19H18O6
📖	1,3,5,6-Tetrahydroxy-7-prenylxanthone	C18H16O6
📖	1,3,5,6-Tetrahydroxy-7-prenylxanthone; 5,6-Di-Me ether	C20H20O6
📖	1,3,5,6-Tetrahydroxy-7-prenylxanthone; Δ3'-Isomer, 2'-oxo, 5-Me ether	C19H16O7
📖	1,3,5,6-Tetrahydroxy-7-prenylxanthone; 6-Me ether	C19H18O6
📖	1,3,5,8-Tetrahydroxy-2-prenylxanthone	C18H16O6
📖	1,3,5,8-Tetrahydroxy-2-prenylxanthone; 3,5-Di-Me ether	C20H20O6
📖	1,3,5,8-Tetrahydroxy-2-prenylxanthone; 3-Me ether	C19H18O6
📖	1,3,5,8-Tetrahydroxy-4-prenylxanthone	C18H16O6
📖	1,3,5,8-Tetrahydroxy-4-prenylxanthone; 2',3'-Dihydro, 3'-hydroxy	C18H18O7
📖	1,3,5,8-Tetrahydroxy-4-prenylxanthone; 3-Me ether	C19H18O6
📖	1,3,6,7-Tetrahydroxy-2-prenylxanthone	C18H16O6
📖	1,3,6,7-Tetrahydroxy-2-prenylxanthone; 3,7-Di-Me ether	C20H20O6
📖	1,3,6,7-Tetrahydroxy-4-prenylxanthone	C18H16O6
📖	1,3,6,7-Tetrahydroxy-4-prenylxanthone; 3-O-(3-Methyl-2-butenyl)	C23H24O6
📖	1,3,6,7-Tetrahydroxy-5-prenylxanthone	C18H16O6
📖	1,3,6,7-Tetrahydroxy-5-prenylxanthone; 7-Me ether	C19H18O6
📖	1,4,5,6-Tetrahydroxy-7-prenylxanthone	C18H16O6
📖	1,4,5,6-Tetrahydroxy-7-prenylxanthone; Δ3'-Isomer, 2'ξ-hydroxy, 5-Me ether	C19H18O7
📖	1,4,5,6-Tetrahydroxy-7-prenylxanthone; 5-Me ether	C19H18O6
📖	1,4,5,7-Tetrahydroxy-2-prenylxanthone	C18H16O6
📖	1,4,5,7-Tetrahydroxy-2-prenylxanthone; 4-Me ether	C19H18O6
📖	1,4,5,7-Tetrahydroxy-2-prenylxanthone; 4-Me ether, 7-O-β-D-glucopyranoside	C25H28O11
📖	1,4,5,7-Tetrahydroxy-2-prenylxanthone; 4-Me ether, 7-O-[9Z-hexadecenoyl-(→6)-β-D-glucopyranoside]	C41H56O12
📖	1,4,5,7-Tetrahydroxy-2-prenylxanthone; 4-Me ether, 7-O-[9Z,12Z-octadecadienoyl-(→6)-β-D-glucopyranoside]	C43H58O12
📖	1,4,5,7-Tetrahydroxy-2-prenylxanthone; 4-Me ether, 7-O-(6-O-octadecanoyl-β-D-glucopyranoside)	C43H62O12
📖	1,4,5,7-Tetrahydroxy-2-prenylxanthone; 4-Me ether, 7-O-[9Z,12Z,15Z-octadecatrienoyl-(→6)-β-D-glucopyranoside]	C43H56O12
📖	1,4,5,7-Tetrahydroxy-2-prenylxanthone; 4-Me ether, 7-O-[9Z-octadecenoyl-(→6)-β-D-glucopyranoside]	C43H60O12
📖	1,4,6,8-Tetrahydroxy-2-prenylxanthone	C18H16O6
📖	1,4,6,8-Tetrahydroxy-2-prenylxanthone; 1-Me ether	C19H18O6
📖	2,3,4,8-Tetrahydroxy-1-prenylxanthone	C18H16O6
📖	2,3,4,8-Tetrahydroxy-1-prenylxanthone; 2,4-Di-Me ether	C20H20O6
📖	2,3,4,8-Tetrahydroxy-1-prenylxanthone; 2-Me ether	C19H18O6
📖	2,3,4,8-Tetrahydroxy-1-prenylxanthone; 3-Me ether	C19H18O6
📖	2,3,5,8-Tetrahydroxy-1-prenylxanthone	C18H16O6
📖	2,3,5,8-Tetrahydroxy-1-prenylxanthone; 2,5-Di-Me ether, 3-O-[α-L-rhamnopyranosyl-(1→2)-[β-D-glucopyranosyl-(1→3)]-β-D-glucopyranoside]	C38H50O20
📖	2,3,6,8-Tetrahydroxy-1-prenylxanthone	C18H16O6
📖	2,3,6,8-Tetrahydroxy-1-prenylxanthone; 2',3'-Dihydro, 3'-hydroxy	C18H18O7
📖	2,3,6,8-Tetrahydroxy-1-prenylxanthone; 2',3'-Dihydro, 3'-hydroxy, 2-Me ether	C19H20O7
📖	2,3,6,8-Tetrahydroxy-1-prenylxanthone; 2,6-Di-Me ether	C20H20O6
📖	2,3,6,8-Tetrahydroxy-1-prenylxanthone; Δ3'-Isomer, 2'ξ-hydroxy	C18H16O7
📖	2,3,6,8-Tetrahydroxy-1-prenylxanthone; 2-Me ether	C19H18O6
📖	2,3,6,8-Tetrahydroxy-1-prenylxanthone; 2-Me ether, 3-O-[α-L-rhamnopyranosyl-(1→2)-[β-D-glucopyranosyl-(1→3)]-β-D-glucopyranoside]	C37H48O20
📖	2,4,6,8-Tetrahydroxy-1-prenylxanthone	C18H16O6
📖	3,4,6,8-Tetrahydroxy-1-prenylxanthone	C18H16O6
📖	3,4,6,8-Tetrahydroxy-1-prenylxanthone; 6-Me ether	C19H18O6
📖	1,3,5,6-Tetrahydroxy-2,4,7-triprenylxanthone	C28H32O6
📖	1,3,6,7-Tetrahydroxy-2,4,8-triprenylxanthone	C28H32O6
📖	1,3,6,7-Tetrahydroxy-2,4,8-triprenylxanthone; 7-Me ether	C29H34O6
📖	1,3,6,7-Tetrahydroxy-2,5,8-triprenylxanthone	C28H32O6
📖	1,3,6,7-Tetrahydroxy-2,5,8-triprenylxanthone; Δ1',Δ1'''-Isomer, 3',3'''-dihydroxy	C28H32O8
📖	1,3,6,7-Tetrahydroxy-2,5,8-triprenylxanthone; Δ1''-Isomer, 3''-hydroxy	C28H32O7
📖	1,3,6,7-Tetrahydroxy-2,5,8-triprenylxanthone; 7-Me ether	C29H34O6
📖	3,4,6,8-Tetrahydroxy-1,2,5-triprenylxanthone	C28H32O6
📖	3,4,6,8-Tetrahydroxy-1,2,5-triprenylxanthone; 2''',3'''-Dihydro, 3'''-hydroxy	C28H34O7
📖	3,4,6,8-Tetrahydroxy-1,2,5-triprenylxanthone; 2',3'-Dihydro, 3'-hydroxy	C28H34O7
📖	1,2,3,4-Tetrahydroxyxanthone	C13H8O6
📖	1,2,3,4-Tetrahydroxyxanthone; 2,4-Di-Me ether	C15H12O6
📖	1,2,3,4-Tetrahydroxyxanthone; 2,3-Methylene, 1,4-di-Me ether	C16H12O6
📖	1,2,3,4-Tetrahydroxyxanthone; Tetra-Me ether	C17H16O6
📖	1,2,3,4-Tetrahydroxyxanthone; 1,2,4-Tri-Me ether	C16H14O6
📖	1,2,3,4-Tetrahydroxyxanthone; 2,3,4-Tri-Me ether, 1-O-[β-D-xylofuranosyl-(1→6)-β-D-glucopyranoside]	C27H32O15
📖	1,2,3,5-Tetrahydroxyxanthone	C13H8O6
📖	1,2,3,5-Tetrahydroxyxanthone; 1,2-Di-Me ether	C15H12O6
📖	1,2,3,5-Tetrahydroxyxanthone; 2,3-Di-Me ether	C15H12O6
📖	1,2,3,5-Tetrahydroxyxanthone; 2,5-Di-Me ether
📖	1,2,3,5-Tetrahydroxyxanthone; 2-Me ether	C14H10O6
📖	1,2,3,5-Tetrahydroxyxanthone; 5-Me ether	C14H10O6
📖	1,2,3,5-Tetrahydroxyxanthone; 2,3-Methylene, 5-Me ether	C15H10O6
📖	1,2,3,5-Tetrahydroxyxanthone; Tetra-Me ether	C17H16O6
📖	1,2,3,5-Tetrahydroxyxanthone; 1,2,3-Tri-Me ether	C16H14O6
📖	1,2,3,5-Tetrahydroxyxanthone; 2,3,5-Tri-Me ether	C16H14O6
📖	1,2,3,5-Tetrahydroxyxanthone; 2,3,5-Tri-Me ether, 1-O-β-D-glucopyranoside	C22H24O11
📖	1,2,3,5-Tetrahydroxyxanthone; 2,3,5-Tri-Me ether, 1-O-[β-D-glucopyranosyl-(1→6)-β-D-glucopyranoside]	C28H34O16
📖	1,2,3,5-Tetrahydroxyxanthone; 2,3,5-Tri-Me ether, 1-O-[β-D-xylofuranosyl-(1→6)-β-D-glucopyranoside]	C27H32O15
📖	1,2,3,5-Tetrahydroxyxanthone; 2,3,5-Tri-Me ether, 1-O-[β-D-xylopyranosyl-(1→6)-β-D-glucopyranoside]	C27H32O15
📖	1,2,3,6-Tetrahydroxyxanthone	C13H8O6
📖	1,2,3,6-Tetrahydroxyxanthone; 1,2-Di-Me ether	C15H12O6
📖	1,2,3,6-Tetrahydroxyxanthone; 2,6-Di-Me ether	C15H12O6
📖	1,2,3,7-Tetrahydroxyxanthone	C13H8O6
📖	1,2,3,7-Tetrahydroxyxanthone; 1,2-Di-Me ether	C15H12O6
📖	1,2,3,7-Tetrahydroxyxanthone; 2,3-Di-Me ether	C15H12O6
📖	1,2,3,7-Tetrahydroxyxanthone; 2,7-Di-Me ether	C15H12O6
📖	1,2,3,7-Tetrahydroxyxanthone; 2,7-Di-Me ether, 3-O-β-D-glucopyranoside	C21H22O11
📖	1,2,3,7-Tetrahydroxyxanthone; 2-Me ether	C14H10O6
📖	1,2,3,7-Tetrahydroxyxanthone; 3-Me ether	C14H10O6
📖	1,2,3,7-Tetrahydroxyxanthone; 2-Me ether, 3-O-β-D-glucopyranoside	C20H20O11
📖	1,2,3,7-Tetrahydroxyxanthone; 2,3-Methylene, 1,7-di-Me ether	C16H12O6
📖	1,2,3,7-Tetrahydroxyxanthone; 2,3-Methylene ether	C14H8O6
📖	1,2,3,7-Tetrahydroxyxanthone; 2,3-Methylene ether, 7-O-[α-L-rhamnopyranosyl-(1→2)-β-D-glucopyranoside]	C26H28O15
📖	1,2,3,7-Tetrahydroxyxanthone; 2,3-Methylene, 1-Me ether	C15H10O6
📖	1,2,3,7-Tetrahydroxyxanthone; Tetra-Me ether	C17H16O6
📖	1,2,3,7-Tetrahydroxyxanthone; 1,2,3-Tri-Me ether	C16H14O6
📖	1,2,3,7-Tetrahydroxyxanthone; 1,2,7-Tri-Me ether	C16H14O6
📖	1,2,3,7-Tetrahydroxyxanthone; 1,3,7-Tri-Me ether	C16H14O6
📖	1,2,3,7-Tetrahydroxyxanthone; 2,3,7-Tri-Me ether	C16H14O6
📖	1,2,3,7-Tetrahydroxyxanthone; 2,3,7-Tri-Me ether, 1-O-β-D-glucopyranoside	C22H24O11
📖	1,2,3,7-Tetrahydroxyxanthone; 2,3,7-Tri-Me ether, 1-O-[β-D-glucopyranosyl-(1→6)-β-D-glucopyranoside]	C28H34O16
📖	1,2,3,7-Tetrahydroxyxanthone; 2,3,7-Tri-Me ether, 1-O-[β-D-xylopyranosyl-(1→6)-β-D-glucopyranoside]	C27H32O15
📖	1,2,3,8-Tetrahydroxyxanthone	C13H8O6
📖	1,2,3,8-Tetrahydroxyxanthone; 1,2-Di-Me ether	C15H12O6
📖	1,2,3,8-Tetrahydroxyxanthone; 2,3-Di-Me ether	C15H12O6
📖	1,2,3,8-Tetrahydroxyxanthone; 2,8-Di-Me ether	C15H12O6
📖	1,2,3,8-Tetrahydroxyxanthone; 2-Me ether	C14H10O6
📖	1,2,3,8-Tetrahydroxyxanthone; 3-Me ether	C14H10O6
📖	1,2,3,8-Tetrahydroxyxanthone; 2,3-Methylene, 1,8-di-Me ether	C16H12O6
📖	1,2,3,8-Tetrahydroxyxanthone; 1,2-Methylene ether	C14H8O6
📖	1,2,3,8-Tetrahydroxyxanthone; Tetra-Me ether	C17H16O6
📖	1,2,3,8-Tetrahydroxyxanthone; 1,2,3-Tri-Me ether	C16H14O6
📖	1,2,4,5-Tetrahydroxyxanthone	C13H8O6
📖	1,2,4,5-Tetrahydroxyxanthone; 1-Me ether	C14H10O6
📖	1,2,4,7-Tetrahydroxyxanthone	C13H8O6
📖	1,2,4,7-Tetrahydroxyxanthone; 1,4-Di-Me ether	C15H12O6
📖	1,2,4,7-Tetrahydroxyxanthone; 1,4-Di-Me ether, 2-O-β-D-glucopyranoside	C21H22O11
📖	1,2,4,7-Tetrahydroxyxanthone; 1,4-Di-Me ether, 7-O-β-D-glucopyranoside	C21H22O11
📖	1,2,4,8-Tetrahydroxyxanthone	C13H8O6
📖	1,2,4,8-Tetrahydroxyxanthone; 1,2,4-Tri-Me ether	C16H14O6
📖	1,2,5,6-Tetrahydroxyxanthone	C13H8O6
📖	1,2,5,6-Tetrahydroxyxanthone; 1,5-Di-Me ether	C15H12O6
📖	1,2,5,6-Tetrahydroxyxanthone; 1,6-Di-Me ether	C15H12O6
📖	1,2,5,6-Tetrahydroxyxanthone; 5,6-Di-Me ether	C15H12O6
📖	1,2,5,6-Tetrahydroxyxanthone; 6-Me ether	C14H10O6
📖	1,2,5,6-Tetrahydroxyxanthone; 1,2,5-Tri-Me ether	C16H14O6
📖	1,2,5,7-Tetrahydroxyxanthone	C13H8O6
📖	1,2,5,7-Tetrahydroxyxanthone; 2,7-Di-Me ether	C15H12O6
📖	1,2,5,7-Tetrahydroxyxanthone; 1-Me ether	C14H10O6
📖	1,2,5,8-Tetrahydroxyxanthone	C13H8O6
📖	1,2,5,8-Tetrahydroxyxanthone; 1-Me ether	C14H10O6
📖	1,2,5,8-Tetrahydroxyxanthone; 8-Me ether	C14H10O6
📖	1,2,6,7-Tetrahydroxyxanthone	C13H8O6
📖	1,2,6,7-Tetrahydroxyxanthone; 1,7-Di-Me ether	C15H12O6
📖	1,2,6,7-Tetrahydroxyxanthone; 1,6,7-Tri-Me ether	C16H14O6
📖	1,2,6,8-Tetrahydroxyxanthone	C13H8O6
📖	1,2,6,8-Tetrahydroxyxanthone; 6,8-Di-O-β-D-glucopyranoside	C25H28O16
📖	1,2,6,8-Tetrahydroxyxanthone; 1,2-Di-Me ether	C15H12O6
📖	1,2,6,8-Tetrahydroxyxanthone; 1,6-Di-Me ether	C15H12O6
📖	1,2,6,8-Tetrahydroxyxanthone; 1,8-Di-Me ether	C15H12O6
📖	1,2,6,8-Tetrahydroxyxanthone; 2,6-Di-Me ether	C15H12O6
📖	1,2,6,8-Tetrahydroxyxanthone; 2,8-Di-Me ether	C15H12O6
📖	1,2,6,8-Tetrahydroxyxanthone; 6,8-Di-Me ether	C15H12O6
📖	1,2,6,8-Tetrahydroxyxanthone; 1,6-Di-Me ether, 8-O-β-D-glucopyranoside	C21H22O11
📖	1,2,6,8-Tetrahydroxyxanthone; 2,6-Di-Me ether, 1-O-β-D-glucopyranoside	C21H22O11
📖	1,2,6,8-Tetrahydroxyxanthone; 2,6-Di-Me ether, 8-O-β-D-glucopyranoside	C21H22O11
📖	1,2,6,8-Tetrahydroxyxanthone; 2,8-Di-Me ether, 6-O-β-D-glucopyranoside	C21H22O11
📖	1,2,6,8-Tetrahydroxyxanthone; 2,6-Di-Me ether, 8-O-[β-D-glucopyranosyl-(1→6)-β-D-glucopyranoside]	C27H32O16
📖	1,2,6,8-Tetrahydroxyxanthone; 2,6-Di-Me ether, 8-O-[4-hydroxy-3,5-dimethoxy-E-cinnamoyl-(→2)-β-D-xylopyranosyl-(1→6)-β-D-glucopyranoside]	C37H40O19
📖	1,2,6,8-Tetrahydroxyxanthone; 2,6-Di-Me ether, 8-O-[4-hydroxy-3-methoxy-E-cinnamoyl-(→2)-β-D-xylopyranosyl-(1→6)-β-D-glucopyranoside]	C36H38O18
📖	1,2,6,8-Tetrahydroxyxanthone; 1,6-Di-Me ether, 2-O-[β-D-xylopyranosyl-(1→6)-β-D-glucopyranoside]	C26H30O15
📖	1,2,6,8-Tetrahydroxyxanthone; 1,6-Di-Me ether, 8-O-[β-D-xylopyranosyl-(1→6)-β-D-glucopyranoside]	C26H30O15
📖	1,2,6,8-Tetrahydroxyxanthone; 2,6-Di-Me ether, 8-O-[β-D-xylopyranosyl-(1→6)-β-D-glucopyranoside]	C26H30O15
📖	1,2,6,8-Tetrahydroxyxanthone; 2,8-Di-Me ether, 1-O-[β-D-xylopyranosyl-(1→6)-β-D-glucopyranoside]	C26H30O15
📖	1,2,6,8-Tetrahydroxyxanthone; 1,6-Di-Me ether, 8-O-[β-D-xylopyranosyl-(1→4)-β-D-xylopyranoside]	C25H28O14
📖	1,2,6,8-Tetrahydroxyxanthone; 2-Et, 1,6-di-Me ether	C17H16O6
📖	1,2,6,8-Tetrahydroxyxanthone; 1-O-β-D-Glucopyranoside	C19H18O11
📖	1,2,6,8-Tetrahydroxyxanthone; 8-O-β-D-Glucopyranoside	C19H18O11
📖	1,2,6,8-Tetrahydroxyxanthone; 1-O-[β-D-Glucopyranosyl-(1→6)-β-D-glucopyranoside]	C25H28O16
📖	1,2,6,8-Tetrahydroxyxanthone; 8-O-[β-D-Glucopyranosyl-(1→3)-β-D-glucopyranoside]	C25H28O16
📖	1,2,6,8-Tetrahydroxyxanthone; 8-O-[β-D-Glucopyranosyl-(1→4)-β-D-glucopyranoside]	C25H28O16
📖	1,2,6,8-Tetrahydroxyxanthone; 1-Me ether	C14H10O6
📖	1,2,6,8-Tetrahydroxyxanthone; 2-Me ether
📖	1,2,6,8-Tetrahydroxyxanthone; 6-Me ether	C14H10O6
📖	1,2,6,8-Tetrahydroxyxanthone; 8-Me ether	C14H10O6
📖	1,2,6,8-Tetrahydroxyxanthone; 6-Me ether, 2-O-[4-O-acetyl-α-L-rhamnopyranosyl-(1→6)-β-D-glucopyranoside]	C28H32O16
📖	1,2,6,8-Tetrahydroxyxanthone; 2-Me ether, 8-O-β-D-glucopyranoside	C20H20O11
📖	1,2,6,8-Tetrahydroxyxanthone; 6-Me ether, 1-O-β-D-glucopyranoside	C20H20O11
📖	1,2,6,8-Tetrahydroxyxanthone; 6-Me ether, 2-O-β-D-glucopyranoside	C20H20O11
📖	1,2,6,8-Tetrahydroxyxanthone; 6-Me ether, 8-O-β-D-glucopyranoside	C20H20O11
📖	1,2,6,8-Tetrahydroxyxanthone; 6-Me ether, 1-O-β-D-glucopyranoside, 2-O-α-L-rhamnopyranoside	C26H30O15
📖	1,2,6,8-Tetrahydroxyxanthone; 6-Me ether, 2-O-[α-L-rhamnopyranosyl-(1→2)-β-D-glucopyranoside]	C26H30O15
📖	1,2,6,8-Tetrahydroxyxanthone; 6-Me ether, 2-O-[α-L-rhamnopyranosyl-(1→6)-β-D-glucopyranoside]	C26H30O15
📖	1,2,6,8-Tetrahydroxyxanthone; 6-Me ether, 2-O-[α-L-rhamnopyranosyl-(1→2)-[α-L-rhamnopyranosyl-(1→3)]-β-D-xylopyranoside]	C31H38O18
📖	1,2,6,8-Tetrahydroxyxanthone; 6-Me ether, 2-O-[α-L-rhamnopyranosyl-(1→2)-β-D-xylopyranoside]	C25H28O14
📖	1,2,6,8-Tetrahydroxyxanthone; 6-Me ether, 2-O-β-D-xylopyranoside	C19H18O10
📖	1,2,6,8-Tetrahydroxyxanthone; 6-Me ether, 1-O-[β-D-xylopyranosyl-(1→2)-β-D-glucopyranoside]	C25H28O15
📖	1,2,6,8-Tetrahydroxyxanthone; 6-Me ether, 1-O-[β-D-xylopyranosyl-(1→6)-β-D-glucopyranoside]	C25H28O15
📖	1,2,6,8-Tetrahydroxyxanthone; 6-Me ether, 2-O-[β-D-xylopyranosyl-(1→6)-β-D-glucopyranoside]	C25H28O15
📖	1,2,6,8-Tetrahydroxyxanthone; 6-Me ether, 8-O-[β-D-xylopyranosyl-(1→6)-β-D-glucopyranoside]	C25H28O15
📖	1,2,6,8-Tetrahydroxyxanthone; 6-Me ether, 2-O-[β-D-xylopyranosyl-(1→2)-β-D-xylopyranoside]	C24H26O14
📖	1,2,6,8-Tetrahydroxyxanthone; 2-O-(1S-Methylpropyl), 1,6-di-Me ether	C19H20O6
📖	1,2,6,8-Tetrahydroxyxanthone; 2-O-(2-Methylpropyl), 1,6-di-Me ether	C19H20O6
📖	1,2,6,8-Tetrahydroxyxanthone; 2-Pentyl, 1,6-di-Me ether	C20H22O6
📖	1,2,6,8-Tetrahydroxyxanthone; 2-(2-Propenyl), 1,6-di-Me ether	C18H16O6
📖	1,2,6,8-Tetrahydroxyxanthone; 2-Propyl, 1,6-di-Me ether	C18H18O6
📖	1,2,6,8-Tetrahydroxyxanthone; Tetra-Me ether	C17H16O6
📖	1,2,6,8-Tetrahydroxyxanthone; 1,2,6-Tri-Me ether	C16H14O6
📖	1,2,6,8-Tetrahydroxyxanthone; 1,2,8-Tri-Me ether	C16H14O6
📖	1,2,6,8-Tetrahydroxyxanthone; 1,6,8-Tri-Me ether	C16H14O6
📖	1,2,6,8-Tetrahydroxyxanthone; 2,6,8-Tri-Me ether	C16H14O6
📖	1,2,6,8-Tetrahydroxyxanthone; 1,2,6-Tri-Me ether, 8-O-β-D-glucopyranoside	C22H24O11
📖	1,2,6,8-Tetrahydroxyxanthone; 1,2,6-Tri-Me ether, 8-O-(2,3,4,6-tetra-O-methyl-β-D-glucopyranoside)	C26H32O11
📖	1,2,6,8-Tetrahydroxyxanthone; 1,2,6-Tri-Me ether, 8-O-[β-D-xylopyranosyl-(1→6)-α-D-glucopyranoside]	C27H32O15
📖	1,2,6,8-Tetrahydroxyxanthone; 1,2,6-Tri-Me ether, 8-O-[β-D-xylopyranosyl-(1→6)-β-D-glucopyranoside]	C27H32O15
📖	1,2,6,8-Tetrahydroxyxanthone; 8-O-[β-D-Xylopyranosyl-(1→6)-β-D-glucopyranoside]	C24H26O15
📖	1,2,7,8-Tetrahydroxyxanthone	C13H8O6
📖	1,2,7,8-Tetrahydroxyxanthone; 1,8-Di-Me ether	C15H12O6
📖	1,2,7,8-Tetrahydroxyxanthone; 2,7-Di-Me ether	C15H12O6
📖	1,2,7,8-Tetrahydroxyxanthone; 2,8-Di-Me ether	C15H12O6
📖	1,2,7,8-Tetrahydroxyxanthone; 1,2,8-Tri-Me ether	C16H14O6
📖	1,3,4,5-Tetrahydroxyxanthone	C13H8O6
📖	1,3,4,5-Tetrahydroxyxanthone; 3,5-Di Me ether	C15H12O6
📖	1,3,4,5-Tetrahydroxyxanthone; 3,4-Di-Me ether	C15H12O6
📖	1,3,4,5-Tetrahydroxyxanthone; 4,5-Di-Me ether	C15H12O6
📖	1,3,4,5-Tetrahydroxyxanthone; 4,5-Di-Me ether, 1-O-β-D-glucopyranoside	C21H22O11
📖	1,3,4,5-Tetrahydroxyxanthone; 4,5-Di-Me ether, 3-O-β-D-glucopyranoside	C21H22O11
📖	1,3,4,5-Tetrahydroxyxanthone; 4-Me ether	C14H10O6
📖	1,3,4,5-Tetrahydroxyxanthone; Tetra-Me ether	C17H16O6
📖	1,3,4,5-Tetrahydroxyxanthone; 3,4,5-Tri-Me ether
📖	1,3,4,5-Tetrahydroxyxanthone; 3,4,5-Tri-Me ether, 1-O-[β-D-xylopyranosyl-(1→6)-β-D-glucopyranoside]	C27H32O15
📖	1,3,4,6-Tetrahydroxyxanthone	C13H8O6
📖	1,3,4,6-Tetrahydroxyxanthone; 1,3-Di-Me ether	C15H12O6
📖	1,3,4,7-Tetrahydroxyxanthone	C13H8O6
📖	1,3,4,7-Tetrahydroxyxanthone; 3,4-Di-Me ether	C15H12O6
📖	1,3,4,7-Tetrahydroxyxanthone; 4,7-Di-Me ether	C15H12O6
📖	1,3,4,7-Tetrahydroxyxanthone; 3,4-Di-Me ether, 7-O-β-D-glucopyranoside	C21H22O11
📖	1,3,4,7-Tetrahydroxyxanthone; 4,7-Di-Me ether, 3-O-β-D-glucopyranoside	C21H22O11
📖	1,3,4,7-Tetrahydroxyxanthone; 4,7-Di-Me ether, 3-O-[β-D-xylopyranosyl-(1→6)-β-D-glucopyranoside]	C26H30O15
📖	1,3,4,7-Tetrahydroxyxanthone; 3-Me ether	C14H10O6
📖	1,3,4,7-Tetrahydroxyxanthone; 4-Me ether	C14H10O6
📖	1,3,4,7-Tetrahydroxyxanthone; Tetra-Me ether	C17H16O6
📖	1,3,4,7-Tetrahydroxyxanthone; 3,4,7-Tri-Me ether	C16H14O6
📖	1,3,4,8-Tetrahydroxyxanthone	C13H8O6
📖	1,3,4,8-Tetrahydroxyxanthone; 1,4-Di-Me ether	C15H12O6
📖	1,3,4,8-Tetrahydroxyxanthone; 3,4-Di-Me ether	C15H12O6
📖	1,3,4,8-Tetrahydroxyxanthone; 3-Me ether	C14H10O6
📖	1,3,4,8-Tetrahydroxyxanthone; 4-Me ether	C14H10O6
📖	1,3,4,8-Tetrahydroxyxanthone; Tetra-Me ether	C17H16O6
📖	1,3,4,8-Tetrahydroxyxanthone; 1,3,4-Tri-Me ether	C16H14O6
📖	1,3,4,8-Tetrahydroxyxanthone; 3,4,8-Tri-Me ether	C16H14O6
📖	1,3,5,6-Tetrahydroxyxanthone	C13H8O6
📖	1,3,5,6-Tetrahydroxyxanthone; 1,3-Di-Me ether	C15H12O6
📖	1,3,5,6-Tetrahydroxyxanthone; 1,5-Di-Me ether	C15H12O6
📖	1,3,5,6-Tetrahydroxyxanthone; 3,5-Di-Me ether	C15H12O6
📖	1,3,5,6-Tetrahydroxyxanthone; 3,6-Di-Me ether	C15H12O6
📖	1,3,5,6-Tetrahydroxyxanthone; 5,6-Di-Me ether	C15H12O6
📖	1,3,5,6-Tetrahydroxyxanthone; 3,5-Di-Me ether, 1-O-β-D-glucopyranoside	C21H22O11
📖	1,3,5,6-Tetrahydroxyxanthone; 3,5-Di-Me ether, 1-O-[β-D-xylopyranosyl-(1→6)-β-D-glucopyranoside]	C26H30O15
📖	1,3,5,6-Tetrahydroxyxanthone; 3-O-β-D-Glucopyranoside	C19H18O11
📖	1,3,5,6-Tetrahydroxyxanthone; 1-Me ether	C14H10O6
📖	1,3,5,6-Tetrahydroxyxanthone; 3-Me ether	C14H10O6
📖	1,3,5,6-Tetrahydroxyxanthone; 5-Me ether	C14H10O6
📖	1,3,5,6-Tetrahydroxyxanthone; 6-Me ether	C14H10O6
📖	1,3,5,6-Tetrahydroxyxanthone; 3-Me ether, 6-O-[β-D-xylopyranosyl-(1→6)-β-D-glucopyranoside]	C25H28O15
📖	1,3,5,6-Tetrahydroxyxanthone; 6-O-(3-Methyl-2-butenyl)	C18H16O6
📖	1,3,5,6-Tetrahydroxyxanthone; 3-O-[α-L-Rhamnopyranosyl-(1→2)-β-D-glucopyranoside]	C25H28O15
📖	1,3,5,6-Tetrahydroxyxanthone; Tetra-Me ether	C17H16O6
📖	1,3,5,6-Tetrahydroxyxanthone; 1,3,5-Tri-Me ether	C16H14O6
📖	1,3,5,6-Tetrahydroxyxanthone; 1,5,6-Tri-Me ether	C16H14O6
📖	1,3,5,6-Tetrahydroxyxanthone; 3,5,6-Tri-Me ether	C16H14O6
📖	1,3,5,6-Tetrahydroxyxanthone; 3,5,6-Tri-Me ether, 1-O-β-D-glucopyranoside	C22H24O11
📖	1,3,5,6-Tetrahydroxyxanthone; 3,5,6-Tri-Me ether, 1-O-[β-D-xylopyranosyl-(1→6)-β-D-glucopyranoside]	C27H32O15
📖	1,3,5,7-Tetrahydroxyxanthone	C13H8O6
📖	1,3,5,7-Tetrahydroxyxanthone; 3,5-Di-Me ether	C15H12O6
📖	1,3,5,7-Tetrahydroxyxanthone; 3,7-Di-Me ether	C15H12O6
📖	1,3,5,7-Tetrahydroxyxanthone; 3-Me ether	C14H10O6
📖	1,3,5,7-Tetrahydroxyxanthone; 5-Me ether	C14H10O6
📖	1,3,5,8-Tetrahydroxyxanthone	C13H8O6
📖	1,3,5,8-Tetrahydroxyxanthone; 1,3-Di-Me ether	C15H12O6
📖	1,3,5,8-Tetrahydroxyxanthone; 3,5-Di-Me ether	C15H12O6
📖	1,3,5,8-Tetrahydroxyxanthone; 3,8-Di-Me ether	C15H12O6
📖	1,3,5,8-Tetrahydroxyxanthone; 5,8-Di-Me ether	C15H12O6
📖	1,3,5,8-Tetrahydroxyxanthone; 3,5-Di-Me ether, 1-O-[α-L-arabinofuranosyl-(1→6)-β-D-glucopyranoside]	C26H30O15
📖	1,3,5,8-Tetrahydroxyxanthone; 3,5-Di-Me ether, 1-O-β-D-glucopyranoside	C21H22O11
📖	1,3,5,8-Tetrahydroxyxanthone; 3,5-Di-Me ether, 8-O-β-D-glucopyranoside	C21H22O11
📖	1,3,5,8-Tetrahydroxyxanthone; 5,8-Di-Me ether, 1-O-β-D-glucopyranoside	C21H22O11
📖	1,3,5,8-Tetrahydroxyxanthone; 3,5-Di-Me ether, 1-O-[β-D-glucopyranosyl-(1→6)-β-D-glucopyranoside]	C27H32O16
📖	1,3,5,8-Tetrahydroxyxanthone; 3,5-Di-Me ether, 1-O-[4-hydroxy-3,5-dimethoxy-E-cinnamoyl-(→2)-β-D-xylopyranosyl-(1→6)-β-D-glucopyranoside]	C37H40O19
📖	1,3,5,8-Tetrahydroxyxanthone; 3,5-Di-Me ether, 1-O-[4-hydroxy-3-methoxy-E-cinnamoyl-(→2)-β-D-xylopyranosyl-(1→6)-β-D-glucopyranoside]	C36H38O18
📖	1,3,5,8-Tetrahydroxyxanthone; 3,5-Di-Me ether, 1-O-[β-D-xylopyranosyl-(1→6)-β-D-glucopyranoside]	C26H30O15
📖	1,3,5,8-Tetrahydroxyxanthone; 1-O-β-D-Glucopyranoside	C19H18O11
📖	1,3,5,8-Tetrahydroxyxanthone; 3-O-β-D-Glucopyranoside	C19H18O11
📖	1,3,5,8-Tetrahydroxyxanthone; 5-O-β-D-Glucopyranoside	C19H18O11
📖	1,3,5,8-Tetrahydroxyxanthone; 8-O-β-D-Glucopyranoside	C19H18O11
📖	1,3,5,8-Tetrahydroxyxanthone; 1-O-[β-D-Glucopyranosyl-(1→6)-β-D-glucopyranoside]	C25H28O16
📖	1,3,5,8-Tetrahydroxyxanthone; 1-O-[4-Hydroxy-3-methoxy-E-cinnamoyl-(→2)-β-D-xylopyranosyl-(1→6)-β-D-glucopyranoside]	C34H34O18
📖	1,3,5,8-Tetrahydroxyxanthone; 3-Me ether	C14H10O6
📖	1,3,5,8-Tetrahydroxyxanthone; 5-Me ether	C14H10O6
📖	1,3,5,8-Tetrahydroxyxanthone; 8-Me ether	C14H10O6
📖	1,3,5,8-Tetrahydroxyxanthone; 3-Me ether, 1-O-β-D-glucopyranoside	C20H20O11
📖	1,3,5,8-Tetrahydroxyxanthone; 3-Me ether, 5-O-β-D-glucopyranoside	C20H20O11
📖	1,3,5,8-Tetrahydroxyxanthone; 3-Me ether, 8-O-β-D-glucopyranoside	C20H20O11
📖	1,3,5,8-Tetrahydroxyxanthone; 5-Me ether, 3-O-β-D-glucopyranoside	C20H20O11
📖	1,3,5,8-Tetrahydroxyxanthone; 5-Me ether, 8-O-β-D-glucopyranoside	C20H20O11
📖	1,3,5,8-Tetrahydroxyxanthone; 8-Me ether, 1-O-β-D-glucopyranoside	C20H20O11
📖	1,3,5,8-Tetrahydroxyxanthone; 3-Me ether, 8-O-[β-D-glucopyranosyl-(1→6)-β-D-glucopyranoside]	C26H30O16
📖	1,3,5,8-Tetrahydroxyxanthone; 5-Me ether, 1-O-[4-hydroxy-3-methoxy-E-cinnamoyl-(→2)-β-D-xylopyranosyl-(1→6)-β-D-glucopyranoside]	C35H36O18
📖	1,3,5,8-Tetrahydroxyxanthone; 3-Me ether, 8-O-[α-L-rhamnopyranosyl-(1→2)-β-D-xylopyranoside]	C25H28O14
📖	1,3,5,8-Tetrahydroxyxanthone; 3-Me ether, 8-O-[β-D-xylopyranosyl-(1→6)-D-glucopyranoside]	C25H28O15
📖	1,3,5,8-Tetrahydroxyxanthone; 5-Me ether, 1-O-[β-D-xylopyranosyl-(1→6)-β-D-glucopyranoside]	C25H28O15
📖	1,3,5,8-Tetrahydroxyxanthone; Tetra-Me ether	C17H16O6
📖	1,3,5,8-Tetrahydroxyxanthone; 1,3,5-Tri-Me ether	C16H14O6
📖	1,3,5,8-Tetrahydroxyxanthone; 3,5,8-Tri-Me ether	C16H14O6
📖	1,3,5,8-Tetrahydroxyxanthone; 3,5,8-Tri-Me ether, 1-O-β-D-glucopyranoside	C22H24O11
📖	1,3,5,8-Tetrahydroxyxanthone; 1,5,8-Tri-Me ether, 3-O-[β-D-glucopyranosyl-(1→6)-β-D-glucopyranoside]	C28H34O16
📖	1,3,5,8-Tetrahydroxyxanthone; 3,5,8-Tri-Me ether, 1-O-(2,3,4,6-tetra-O-methyl-β-D-glucopyranoside)	C26H32O11
📖	1,3,5,8-Tetrahydroxyxanthone; 3,5,8-Tri-Me ether, 1-O-[β-D-xylopyranosyl-(1→6)-β-D-glucopyranoside]	C27H32O15
📖	1,3,6,7-Tetrahydroxyxanthone	C13H8O6
📖	1,3,6,7-Tetrahydroxyxanthone; 1-O-(6-Deoxy-β-D-glucopyranoside)	C19H18O10
📖	1,3,6,7-Tetrahydroxyxanthone; 1,3-Di-Me ether	C15H12O6
📖	1,3,6,7-Tetrahydroxyxanthone; 1,7-Di-Me ether	C15H12O6
📖	1,3,6,7-Tetrahydroxyxanthone; 3,6-Di-Me ether	C15H12O6
📖	1,3,6,7-Tetrahydroxyxanthone; 3,7-Di-Me ether	C15H12O6
📖	1,3,6,7-Tetrahydroxyxanthone; 6,7-Di-Me ether	C15H12O6
📖	1,3,6,7-Tetrahydroxyxanthone; 3,7-Di-Me ether, 6-Ac	C17H14O7
📖	1,3,6,7-Tetrahydroxyxanthone; 3,7-Di-Me ether, 6-O-[α-L-rhamnopyranosyl-(1→2)-β-D-glucopyranoside]	C27H32O15
📖	1,3,6,7-Tetrahydroxyxanthone; 7-O-(3,7-Dimethyl-2E,6-octadienyl)	C23H24O6
📖	1,3,6,7-Tetrahydroxyxanthone; 3-O-β-D-Glucopyranoside	C19H18O11
📖	1,3,6,7-Tetrahydroxyxanthone; 6-O-β-D-Glucopyranoside	C19H18O11
📖	1,3,6,7-Tetrahydroxyxanthone; 1-Me ether	C14H10O6
📖	1,3,6,7-Tetrahydroxyxanthone; 3-Me ether	C14H10O6
📖	1,3,6,7-Tetrahydroxyxanthone; 6-Me ether	C14H10O6
📖	1,3,6,7-Tetrahydroxyxanthone; 7-Me ether	C14H10O6
📖	1,3,6,7-Tetrahydroxyxanthone; 7-Me ether, 3,6-di-Ac	C18H14O8
📖	1,3,6,7-Tetrahydroxyxanthone; 1-Me ether, 6-O-β-D-glucopyranoside	C20H20O11
📖	1,3,6,7-Tetrahydroxyxanthone; 3-Me ether, 6-O-[α-L-rhamnopyranosyl-(1→2)-β-D-glucopyranoside]	C26H30O15
📖	1,3,6,7-Tetrahydroxyxanthone; 7-Me ether, 6-O-[α-L-rhamnopyranosyl-(1→2)-β-D-glucopyranoside]	C26H30O15
📖	1,3,6,7-Tetrahydroxyxanthone; Tetra-Me ether	C17H16O6
📖	1,3,6,7-Tetrahydroxyxanthone; 1,3,7-Tri-Me ether	C16H14O6
📖	1,3,6,7-Tetrahydroxyxanthone; 3,6,7-Tri-Me ether	C16H14O6
📖	1,3,6,8-Tetrahydroxyxanthone	C13H8O6
📖	1,3,6,8-Tetrahydroxyxanthone; 3,6-Di-Me ether	C15H12O6
📖	1,3,6,8-Tetrahydroxyxanthone; 1-Me ether	C14H10O6
📖	1,3,6,8-Tetrahydroxyxanthone; 3,6,8-Tri-Me ether	C16H14O6
📖	1,3,6,8-Tetrahydroxyxanthone; 3,6,8-Tri-Me ether, 1-O-[β-D-xylopyranosyl-(1→6)-β-D-glucopyranoside]	C27H32O15
📖	1,3,6,8-Tetrahydroxyxanthone; 3,6,8-Tri-Me ether, 1-O-[β-D-xylopyranosyl-(1→6)-β-D-glucopyranoside], hexa-Ac	C39H44O21
📖	1,4,5,6-Tetrahydroxyxanthone	C13H8O6
📖	1,4,5,6-Tetrahydroxyxanthone; 4,5-Di-Me ether	C15H12O6
📖	1,4,5,6-Tetrahydroxyxanthone; 5-Me ether	C14H10O6
📖	1,4,5,7-Tetrahydroxyxanthone	C13H8O6
📖	1,4,5,7-Tetrahydroxyxanthone; 1,4,5-Tri-Me ether, 7-O-[β-D-glucopyranosyl-(1→2)-β-D-galactopyranoside]	C28H34O16
📖	1,4,6,7-Tetrahydroxyxanthone	C13H8O6
📖	1,4,6,7-Tetrahydroxyxanthone; 4,7-Di-Me ether	C15H12O6
📖	1,4,6,7-Tetrahydroxyxanthone; 4,7-Di-Me ether, 6-O-β-D-glucopyranoside	C21H22O11
📖	1,4,6,7-Tetrahydroxyxanthone; 6,7-Methylene ether	C14H8O6
📖	1,5,6,7-Tetrahydroxyxanthone	C13H8O6
📖	1,5,6,7-Tetrahydroxyxanthone; 5,6-Di-Me ether	C15H12O6
📖	1,5,6,7-Tetrahydroxyxanthone; 5,7-Di-Me ether	C15H12O6
📖	1,5,6,7-Tetrahydroxyxanthone; 6,7-Di-Me ether	C15H12O6
📖	1,5,6,7-Tetrahydroxyxanthone; 5,7-Di-Me ether, 6-hexadecanoyl	C31H42O7
📖	1,5,6,7-Tetrahydroxyxanthone; 7-Me ether	C14H10O6
📖	1,5,6,7-Tetrahydroxyxanthone; 7-Me ether, 5-O-β-D-glucopyranoside	C20H20O11
📖	1,5,6,7-Tetrahydroxyxanthone; Tetra-Me ether	C17H16O6
📖	1,5,6,7-Tetrahydroxyxanthone; 5,6,7-Tri-Me ether	C16H14O6
📖	2,3,4,5-Tetrahydroxyxanthone	C13H8O6
📖	2,3,4,5-Tetrahydroxyxanthone; 2,3-Di-Me ether	C15H12O6
📖	2,3,4,5-Tetrahydroxyxanthone; 2,3,5-Tri-Me ether	C16H14O6
📖	2,3,4,6-Tetrahydroxyxanthone	C13H8O6
📖	2,3,4,6-Tetrahydroxyxanthone; 2,3-Di-Me ether	C15H12O6
📖	2,3,4,6-Tetrahydroxyxanthone; 3,4-Di-Me ether	C15H12O6
📖	2,3,4,6-Tetrahydroxyxanthone; 3,6-Di-Me ether	C15H12O6
📖	2,3,4,6-Tetrahydroxyxanthone; 2,3,4-Tri-Me ether	C16H14O6
📖	2,3,4,6-Tetrahydroxyxanthone; 2,3,6-Tri-Me ether	C16H14O6
📖	2,3,4,7-Tetrahydroxyxanthone	C13H8O6
📖	2,3,4,7-Tetrahydroxyxanthone; 2,3-Di-Me ether	C15H12O6
📖	2,3,4,7-Tetrahydroxyxanthone; 2,4-Di-Me ether	C15H12O6
📖	2,3,4,7-Tetrahydroxyxanthone; 3,4-Di-Me ether	C15H12O6
📖	2,3,4,7-Tetrahydroxyxanthone; 3,7-Di-Me ether	C15H12O6
📖	2,3,4,7-Tetrahydroxyxanthone; 2,3-Methylene ether	C14H8O6
📖	2,3,4,7-Tetrahydroxyxanthone; 2,3,4-Tri-Me ether	C16H14O6
📖	2,3,5,6-Tetrahydroxyxanthone	C13H8O6
📖	2,3,5,6-Tetrahydroxyxanthone; Tetra-Ac	C21H16O10
📖	2,3,5,6-Tetrahydroxyxanthone; Tetra-Me ether	C17H16O6
📖	2,3,6,7-Tetrahydroxyxanthone	C13H8O6
📖	2,3,6,7-Tetrahydroxyxanthone; Tetra-Ac	C21H16O10
📖	2,3,6,7-Tetrahydroxyxanthone; Tetra-Me ether	C17H16O6
📖	3,4,5,6-Tetrahydroxyxanthone	C13H8O6
📖	3,4,5,6-Tetrahydroxyxanthone; Tetra-Ac	C21H16O10
📖	3,4,5,6-Tetrahydroxyxanthone; Tetra-Me ether	C17H16O6
📖	3,4,6,8-Tetrahydroxyxanthone-1-carboxylic acid	C14H8O8
📖	3,4,6,8-Tetrahydroxyxanthone-1-carboxylic acid; 4,6-Di-Me ether, Me ester	C17H14O8
📖	3,4,6,8-Tetrahydroxyxanthone-1-carboxylic acid; Me ester	C15H10O8
📖	3,4,6,8-Tetrahydroxyxanthone-1-carboxylic acid; 6-Me ether, Me ester	C16H12O8
📖	1,3,6,7-Tetrahydroxy-2-β-D-xylopyranosylxanthone	C18H16O10
📖	1,3,6,7-Tetrahydroxy-2-β-D-xylopyranosylxanthone; 4-Hydroxy	C18H16O11
📖	2,3,5,6-Tetramethylxanthone	C17H16O2
📖	Thwaitesixanthone	C23H20O5
📖	Thwaitesixanthone; 11,12-Dihydro	C23H22O5
📖	Thwaitesixanthone; 5,8-Dihydroxy	C23H20O7
📖	Thwaitesixanthone; 1'-Hydroxy	C23H20O6
📖	Thwaitesixanthone; 5-Hydroxy	C23H20O6
📖	Thwaitesixanthone; 5-Hydroxy, 1,2-dihydro	C23H22O6
📖	Thwaitesixanthone; 5-Hydroxy, 1,2,11,12-tetrahydro	C23H24O6
📖	Thwaitesixanthone; 5-Methoxy, 1,2-dihydro	C24H24O6
📖	Tovophyllin A	C28H30O6
📖	Tovophyllin A; 1',2'-Dihydro	C28H32O6
📖	Tovophyllin A; 1',2'-Dihydro, 2'ξ-hydroxy	C28H32O7
📖	Tovophyllin B	C28H28O6
📖	Tovophyllin B; 3',4'-Dihydro	C28H30O6
📖	Tovoxanthone	C18H14O5
📖	Tovoxanthone; 11-Deoxy, 8-hydroxy	C18H14O5
📖	Tovoxanthone; Dideoxy, 8-hydroxy	C18H14O4
📖	Tovoxanthone; 8-Hydroxy	C18H14O6
📖	Toxyloxanthone A	C23H22O5
📖	Toxyloxanthone A; 10-Deoxy, 8,9-dihydroxy	C23H22O6
📖	Toxyloxanthone A; 10-Deoxy, 1'ξ,8-dihydroxy, 2'ξ,3'-epoxide	C23H22O7
📖	Toxyloxanthone A; 10-Deoxy, 8-hydroxy	C23H22O5
📖	Toxyloxanthone A; 10-Deoxy, 9-hydroxy	C23H22O5
📖	Toxyloxanthone A; 4',9-Dihydroxy(3'E-)	C23H22O7
📖	Toxyloxanthone A; 5',9-Dihydroxy(3'Z-)	C23H22O7
📖	Toxyloxanthone A; 8,9-Dimethoxy	C25H26O7
📖	Toxyloxanthone A; 4'-Hydroxy(3'Z-)	C23H22O6
📖	Toxyloxanthone A; 7-Hydroxy	C23H22O6
📖	Toxyloxanthone A; 8-Hydroxy	C23H22O6
📖	Toxyloxanthone A; 9-Hydroxy	C23H22O6
📖	Toxyloxanthone A; 9-Hydroxy, 10-Me ether	C24H24O6
📖	Toxyloxanthone A; Δ3'-Isomer, 2'ξ,9-dihydroxy	C23H22O7
📖	Toxyloxanthone A; Δ3'-Isomer, 2'ξ -hydroperoxy, 10-deoxy, 8-hydroxy	C23H22O7
📖	Toxyloxanthone A; 8-Methoxy, 10-deoxy, 9-hydroxy	C24H24O6
📖	Toxyloxanthone A; 8-Methoxy, 9-hydroxy	C24H24O7
📖	Toxyloxanthone A; 2',3,3',4-Tetrahydro, 3'-hydroxy	C23H26O6
📖	Toxyloxanthone B	C18H14O6
📖	Toxyloxanthone B; 1',2'-Dihydro	C18H16O6
📖	Toxyloxanthone B; 5,9-Di-Me ether	C20H18O6
📖	Toxyloxanthone B; 5-Me ether	C19H16O6
📖	Toxyloxanthone C	C18H16O6
📖	Toxyloxanthone C; 1-Me ether	C19H18O6
📖	Toxyloxanthone C; 6-O-(3-Methyl-2-butenyl)	C23H24O6
📖	2,4,6-Trichloro-1,5-dihydroxy-7-methylxanthone	C14H7Cl3O4
📖	2,4,7-Trichloro-3,5,6,8-tetrahydroxy-1-methylxanthone	C14H7Cl3O6
📖	2,4,7-Trichloro-3,5,6,8-tetrahydroxy-1-methylxanthone; 5-Me ether	C15H9Cl3O6
📖	2,4,5-Trichloro-1,3,6-trihydroxy-8-methylxanthone	C14H7Cl3O5
📖	2,4,5-Trichloro-1,3,6-trihydroxy-8-methylxanthone; 3,6-Di-Me ether	C16H11Cl3O5
📖	2,4,5-Trichloro-1,3,6-trihydroxy-8-methylxanthone; 3-Me ether	C15H9Cl3O5
📖	2,4,5-Trichloro-1,3,6-trihydroxy-8-methylxanthone; 6-Me ether	C15H9Cl3O5
📖	2,4,5-Trichloro-1,3,6-trihydroxy-8-methylxanthone; Tri-Me ether	C17H13Cl3O5
📖	2,4,5-Trichloro-3,6,8-trihydroxy-1-methylxanthone	C14H7Cl3O5
📖	2,4,5-Trichloro-3,6,8-trihydroxy-1-methylxanthone; 3-Me ether	C15H9Cl3O5
📖	2,4,5-Trichloro-3,6,8-trihydroxy-1-methylxanthone; 6-Me ether	C15H9Cl3O5
📖	2,4,7-Trichloro-1,3,6-trihydroxy-8-methylxanthone	C14H7Cl3O5
📖	2,4,7-Trichloro-1,3,6-trihydroxy-8-methylxanthone; 3-Me ether	C15H9Cl3O5
📖	2,4,7-Trichloro-3,6,8-trihydroxy-1-methylxanthone	C14H7Cl3O5
📖	2,4,7-Trichloro-3,6,8-trihydroxy-1-methylxanthone; 3,6-Di-Me ether	C16H11Cl3O5
📖	2,4,7-Trichloro-3,6,8-trihydroxy-1-methylxanthone; 6-Me ether	C15H9Cl3O5
📖	Trichodermaxanthone	C16H12O6
📖	2,9,11-Trihydroxy-12H-benzo[a]xanthen-12-one	C17H10O5
📖	2,9,11-Trihydroxy-12H-benzo[a]xanthen-12-one; 2-Me ether	C18H12O5
📖	2,9,11-Trihydroxy-12H-benzo[a]xanthen-12-one; 2-Me ether, 9-O-β-D-glucopyranoside	C24H22O10
📖	6,10,11-Trihydroxy-3,3-dimethyl-8,9-diprenyl-3H,7H-pyrano[2,3-c]xanthen-7-one	C28H30O6
📖	6,10,11-Trihydroxy-3,3-dimethyl-8,9-diprenyl-3H,7H-pyrano[2,3-c]xanthen-7-one; 1',2'-Dihydro, 2'ξ-hydroxy	C28H32O7
📖	6,10,11-Trihydroxy-3,3-dimethyl-8,9-diprenyl-3H,7H-pyrano[2,3-c]xanthen-7-one; 2'',3''-Dihydro, 3''-hydroxy	C28H32O7
📖	6,10,11-Trihydroxy-3,3-dimethyl-8,9-diprenyl-3H,7H-pyrano[2,3-c]xanthen-7-one; 1',2',2'',3''-Tetrahydro, 3''-hydroxy	C28H34O7
📖	5,8,9-Trihydroxy-2,2-dimethyl-2H,6H-pyrano[3,2-b]xanthen-6-one	C18H14O6
📖	5,8,9-Trihydroxy-2,2-dimethyl-2H,6H-pyrano[3,2-b]xanthen-6-one; 8-Me ether	C19H16O6
📖	6,8,9-Trihydroxy-3,3-dimethyl-3H,7H-pyrano[2,3-c]xanthen-7-one	C18H14O6
📖	6,8,9-Trihydroxy-3,3-dimethyl-3H,7H-pyrano[2,3-c]xanthen-7-one; 8-Deoxy	C18H14O5
📖	6,9,10-Trihydroxy-3,3-dimethyl-3H,7H-pyrano[2,3-c]xanthen-7-one	C18H14O6
📖	6,9,10-Trihydroxy-3,3-dimethyl-3H,7H-pyrano[2,3-c]xanthen-7-one; 6-Me ether	C19H16O6
📖	6,9,10-Trihydroxy-3,3-dimethyl-3H,7H-pyrano[2,3-c]xanthen-7-one; 6-Me ether, di-Ac	C23H20O8
📖	6,9,10-Trihydroxy-3,3-dimethyl-3H,7H-pyrano[2,3-c]xanthen-7-one; Tri-Me ether	C21H20O6
📖	6,10,11-Trihydroxy-3,3-dimethyl-3H,7H-pyrano[2,3-c]xanthen-7-one	C18H14O6
📖	6,10,11-Trihydroxy-3,3-dimethyl-3H,7H-pyrano[2,3-c]xanthen-7-one; 11-O-β-D-Glucopyranoside	C24H24O11
📖	6,10,11-Trihydroxy-3,3-dimethyl-3H,7H-pyrano[2,3-c]xanthen-7-one; 11-Me ether	C19H16O6
📖	6,10,11-Trihydroxy-3,3-dimethyl-3H,7H-pyrano[2,3-c]xanthen-7-one; 8-Methoxy, 10,11-di-Me ether	C21H20O7
📖	6,10,11-Trihydroxy-3,3-dimethyl-3H,7H-pyrano[2,3-c]xanthen-7-one; 10,11-Methylene, 6-Me ether	C20H16O6
📖	6,10,11-Trihydroxy-3,3-dimethyl-3H,7H-pyrano[2,3-c]xanthen-7-one; Tri-Me ether	C21H20O6
📖	1,3,5-Trihydroxy-2,4-diprenylxanthone	C23H24O5
📖	1,3,5-Trihydroxy-2,4-diprenylxanthone; 3,5-Di-Me ether	C25H28O5
📖	1,3,5-Trihydroxy-2,4-diprenylxanthone; Δ3',Δ3''-Isomer, 2',2''-dihydroxy	C23H24O7
📖	1,3,5-Trihydroxy-2,4-diprenylxanthone; 3-Me ether	C24H26O5
📖	1,3,5-Trihydroxy-2,8-diprenylxanthone	C23H24O5
📖	1,3,5-Trihydroxy-2,8-diprenylxanthone; 2'',3''-Dihydro, 3''-hydroxy	C23H26O6
📖	1,3,5-Trihydroxy-2,8-diprenylxanthone; 2'',3''-Dihydro, 3''-methoxy	C24H28O6
📖	1,3,5-Trihydroxy-2,8-diprenylxanthone; 2',2'',3',3''-Tetrahydro, 3'-ethoxy, 3''-hydroxy	C25H32O7
📖	1,3,5-Trihydroxy-4,8-diprenylxanthone	C23H24O5
📖	1,3,7-Trihydroxy-2,4-diprenylxanthone	C23H24O5
📖	1,3,7-Trihydroxy-2,4-diprenylxanthone; Δ3'-Isomer, 2'ξ-hydroxy	C23H24O6
📖	1,3,7-Trihydroxy-2,8-diprenylxanthone	C23H24O5
📖	1,3,7-Trihydroxy-2,8-diprenylxanthone; 2'',3''-Dihydro, 3''-hydroxy	C23H26O6
📖	1,3,7-Trihydroxy-2,8-diprenylxanthone; 7-O-(1,1-Dimethyl-2-propenoyl)	C28H32O5
📖	1,3,7-Trihydroxy-2,8-diprenylxanthone; 7-Me ether	C24H26O5
📖	1,4,5-Trihydroxy-3,6-diprenylxanthone	C23H24O5
📖	2,6,8-Trihydroxy-1,5-diprenylxanthone	C23H24O5
📖	2,6,8-Trihydroxy-1,5-diprenylxanthone; Δ3',Δ3''-Isomer, 2'ξ,2''ξ-dihydroxy	C23H24O7
📖	1,3,7-Trihydroxy-6-(2-hydroxyethyl)xanthone	C15H12O6
📖	1,3,7-Trihydroxy-6-(2-hydroxyethyl)xanthone; 1,3,7-Tri-Me ether	C18H18O6
📖	1,3,8-Trihydroxy-4-(2-hydroxyethyl)xanthone	C15H12O6
📖	1,3,8-Trihydroxy-4-(2-hydroxyethyl)xanthone; 3,8-Di-Me ether	C17H16O6
📖	1,3,8-Trihydroxy-4-(2-hydroxyethyl)xanthone; 3-Me ether	C16H14O6
📖	4,5,8-Trihydroxy-6-(2-hydroxyethyl)xanthone-1-carboxylic acid	C16H12O8
📖	4,5,8-Trihydroxy-6-(2-hydroxyethyl)xanthone-1-carboxylic acid; 8-Me ether, Me ester	C18H16O8
📖	1,3,8-Trihydroxy-4-(3-hydroxy-3-methylbutanoyl)-2-prenylxanthone	C23H24O7
📖	2,7,8-Trihydroxy-1-(hydroxymethyl)-3-methylxanthone	C15H12O6
📖	2,7,8-Trihydroxy-1-(hydroxymethyl)-3-methylxanthone; 1'-O-(1,1-Dimethyl-2-propenyl), 7,8-di-Me ether	C22H24O6
📖	2,7,8-Trihydroxy-1-(hydroxymethyl)-3-methylxanthone; 2-O-(3-Methyl-2-butenyl), 7,8-di-Me ether	C22H24O6
📖	2,7,8-Trihydroxy-1-(hydroxymethyl)-3-methylxanthone; 2-O-(3-Methyl-2-butenyl), 7,8-di-Me ether, 1'-Ac	C24H26O7
📖	2,7,8-Trihydroxy-1-(hydroxymethyl)-3-methylxanthone; 2-O-(3-Methyl-2-butenyl), 8-Me ether	C21H22O6
📖	2,7,8-Trihydroxy-1-(hydroxymethyl)-3-methylxanthone; 2,7,8-Tri-Me ether	C18H18O6
📖	1,5,8-Trihydroxy-3-(hydroxymethyl)xanthone	C14H10O6
📖	1,5,8-Trihydroxy-3-(hydroxymethyl)xanthone; 5-Me ether	C15H12O6
📖	2,3,6-Trihydroxy-7-(hydroxymethyl)xanthone-1-carboxylic acid	C15H10O8
📖	1,3,8-Trihydroxy-4-(1-hydroxy-3-oxobutyl)xanthone	C17H14O7
📖	1,3,8-Trihydroxy-4-(1-hydroxy-3-oxobutyl)xanthone; (S)-form	C17H14O7
📖	1,3,8-Trihydroxy-4-(1-hydroxy-3-oxobutyl)xanthone; (S)-form, 3,8-Di-Me ether	C19H18O7
📖	1,3,8-Trihydroxy-4-(1-hydroxy-3-oxobutyl)xanthone; (S)-form, 3-Me ether	C18H16O7
📖	1,3,8-Trihydroxy-4-methyl-2,7-diprenylxanthone	C24H26O5
📖	1,3,6-Trihydroxy-8-methylxanthone	C14H10O5
📖	1,3,6-Trihydroxy-8-methylxanthone; 3,6-Di-Me ether	C16H14O5
📖	1,3,6-Trihydroxy-8-methylxanthone; 1-Me ether	C15H12O5
📖	1,3,6-Trihydroxy-8-methylxanthone; 3-Me ether	C15H12O5
📖	1,3,6-Trihydroxy-8-methylxanthone; 6-Me ether	C15H12O5
📖	1,3,6-Trihydroxy-8-methylxanthone; 3-Me ether, 6-O-[3-methoxy-4-(tetracosyloxy)-E-cinnamoyl]	C49H68O8
📖	1,3,6-Trihydroxy-8-methylxanthone; 3-Me ether, 6-O-sulfate	C15H12O8S
📖	1,3,6-Trihydroxy-8-methylxanthone; 6-O-(4-O-Methyl-β-D-glucopyranoside)	C21H22O10
📖	1,3,8-Trihydroxy-6-methylxanthone	C14H10O5
📖	1,3,8-Trihydroxy-6-methylxanthone; 1,3-Di-Me ether	C16H14O5
📖	1,3,8-Trihydroxy-6-methylxanthone; 3-O-(3,7-Dimethyl-2E,6-octadienyl)	C24H26O5
📖	1,3,8-Trihydroxy-6-methylxanthone; 3-O-(4-Hydroxy-3-hydroxymethyl-2-butenyl)	C19H18O7
📖	1,3,8-Trihydroxy-6-methylxanthone; 3-O-(3-Hydroxymethyl-2E-butenyl)	C19H18O6
📖	1,3,8-Trihydroxy-6-methylxanthone; 3-Me ether	C15H12O5
📖	1,3,8-Trihydroxy-6-methylxanthone; 3-Me ether, 8-O-[β-D-glucopyranosyl-(1→6)-β-D-glucopyranoside]	C27H32O15
📖	1,3,8-Trihydroxy-6-methylxanthone; 3-Me ether, 8-O-[α-L-rhamnopyranosyl-(1→6)-β-D-glucopyranoside]	C27H32O14
[truncated: 223 more rows]
